# 1 **The geometry of domain-general performance monitoring** 2 **representations in the human medial frontal cortex**

3

4 Zhongzheng Fu<sup>1,2</sup>, Danielle Beam<sup>1</sup>, Jeffrey M. Chung<sup>3</sup>, Chrystal M. Reed<sup>3</sup>, Adam N. Mamelak<sup>1</sup>,  
5 Ralph Adolphs<sup>2,4</sup>, Ueli Rutishauser<sup>1,3,4,5,\*</sup>

6

7 <sup>1</sup> Department of Neurosurgery, Cedars-Sinai Medical Center, Los Angeles, CA, USA

8 <sup>2</sup> Division of Humanities and Social Sciences, California Institute of Technology, Pasadena, CA,  
9 USA

10 <sup>3</sup> Department of Neurology, Cedars-Sinai Medical Center, Los Angeles, CA, USA

11 <sup>4</sup> Division of Biology and Bioengineering, California Institute of Technology, Pasadena, CA, USA

12 <sup>5</sup> Center for Neural Science and Medicine, Department of Biomedical Sciences, Cedars-Sinai  
13 Medical Center, Los Angeles, CA, USA

14

15 \*Correspondence: [rutishauseru@csmc.edu](mailto:rutishauseru@csmc.edu)

16

17

18

19

20

21

22

23

24

25

26

27

28

29

30

31

32

33

34

35

36 **Abstract**

37

38 Flexibly adapting behavior to achieve a desired goal depends on the ability to monitor one's own  
39 performance. A key open question is how performance monitoring can be both highly flexible to  
40 support multiple tasks and specialized to support specific tasks. We characterized performance  
41 monitoring representations by recording single neurons in the human medial frontal cortex  
42 (MFC). Subjects performed two tasks that involve three types of cognitive conflict. Neural  
43 population representations of conflict, error and control demand generalized across tasks and  
44 time while at the same time also encoding task specialization. This arose from a combination of  
45 single neurons whose responses were task-invariant and non-linearly mixed. Neurons encoding  
46 conflict ex-post served to iteratively update internal estimates of control demand as predicted  
47 by a Bayesian model. These findings reveal how the MFC representation of evaluative signals are  
48 both abstract and specific, suggesting a mechanism for computing and maintaining control  
49 demand estimates across trials and tasks.

50

51

## 52 **Introduction**

53

54         Successful goal-directed behavior in uncertain environments depends critically on  
55 continual evaluation of one's own performance (Ullsperger, 2017; Ullsperger et al., 2014). We  
56 constantly evaluate whether we made an error, experienced conflict, received reward, or  
57 responded fast or slow. Information about past and present performance is in turn used by  
58 various downstream processes for cognitive control, affective responses and autonomic  
59 homeostasis. The resulting behavioral and physiological adaptations encompass task-specific  
60 attentional modulation of perception (Danielmeier et al., 2011; Egner and Hirsch, 2005; King et  
61 al., 2010; Purcell and Kiani, 2016), estimation of control demand (Darlington et al., 2018; Jiang et  
62 al., 2015; Shenhav et al., 2013), global modulation of motor system readiness (Aron et al., 2007;  
63 Danielmeier et al., 2011; King et al., 2010; Murphy et al., 2016; Niv et al., 2007; Wessel and Aron,  
64 2017), emotional state (Bach and Dayan, 2017; Eldar et al., 2016; Shackman et al., 2011), or  
65 arousal levels (Crone et al., 2004; Ebitz and Platt, 2015). The medial frontal cortex (MFC)  
66 computes and represents many aspects of performance monitoring (Bonini et al., 2014; Carter et  
67 al., 1998; Ebitz and Platt, 2015; Fu et al., 2019; Heilbronner and Hayden, 2016; Ito et al., 2003;  
68 Kerns et al., 2004; Pouget et al., 2011; Sajad et al., 2019; Sarafyazd and Jazayeri, 2019; Shenhav  
69 et al., 2013; Sheth et al., 2012; Stuphorn et al., 2000; Tang et al., 2016; Ullsperger et al., 2014;  
70 Wang et al., 2018a, 2018b), making it a primary substrate for communicating evaluative signals  
71 to downstream processes (Miller and Cohen, 2001; Shenhav et al., 2013; Ullsperger, 2017;  
72 Ullsperger et al., 2014).

73

74         On the one hand, cognitive control involves modulating specific sensory or motor  
75 processes involved in the task performed, thus requiring the availability of task-specific  
76 information in performance monitoring signals, a form of "credit assignment" (McDougle et al.,  
77 2016; Sarafyazd and Jazayeri, 2019). For example, an error made by dialing the wrong number  
78 should be distinguishable from an error made by calling an old friend by the wrong name because  
79 they require different correction mechanisms. On the other hand, humans excel at performing  
80 novel tasks with little prior training – an aspect of flexible behavior that is difficult to study in

81 nonhuman primates, since they cannot be verbally instructed to execute an untrained novel task.  
82 This kind of cognitive flexibility requires domain-general mechanisms that abstract from the  
83 sensorimotor details of any particular task (Bernardi et al., 2020; Minxha et al., 2020). In a novel  
84 setting, errors and conflicts can have unanticipated causes, and generic control mechanisms such  
85 as slowing all movement down and increasing arousal are adaptive because they buy time to  
86 recruit more resources for domain-specific adaptations to take effect (Ullsperger, 2017;  
87 Ullsperger et al., 2014). Downstream processes implementing generic adaptations in arousal,  
88 global motor suppression (Danielmeier et al., 2011; King et al., 2010; Wessel and Aron, 2017),  
89 and urgency (Cavanagh et al., 2011; Heitz and Schall, 2012; Murphy et al., 2016; Thura and Cisek,  
90 2017) also depend on the availability of domain-general performance monitoring signals to avoid  
91 the need to re-learn how to interpret them for every task. Together, these requirements raise  
92 the critical question of how performance monitoring signals are represented in the MFC so that  
93 they are accessible to inform both domain-specific and domain-general downstream processes.  
94 Answering this question requires recording from multiple single neurons in order to characterize  
95 the population-level structure of representations in MFC, about which little is known.

96  
97         Theoretically, a fundamental trade-off exists between representations that support task  
98 specialization and generalization (DiCarlo and Cox, 2007; Fusi et al., 2016). Specialization requires  
99 that as many different conditions as possible can be differentiated from each other by a  
100 downstream process that has access to a large subset of the neurons in the representation  
101 (“dichotomies” in the case of pairwise differentiations as implemented, for instance, by a linear  
102 classifier). This requirement can be fulfilled by increasing the dimensionality of the  
103 representation: if there are as many dimensions as differentiations, all possible dichotomies can  
104 be read out, in principle. By contrast, generalization requires low-dimensional representations  
105 that abstract away (“disentangle”) details specific to a single task (DiCarlo and Cox, 2007; Higgins  
106 et al., 2016, 2018). Theoretical work shows that the geometry of neural representations can be  
107 configured to accommodate both of these seemingly conflicting needs (Bernardi et al., 2020).  
108 Given a representation formatted in this way, linear decoders (which represent conservatively  
109 what downstream neurons could read out assuming a feed-forward architecture), depending on

110 how they are trained, can either differentiate between many different conditions (specialization)  
111 or generalize across conditions, tasks, and time (abstraction, “cross-condition generalization”).  
112 In such a geometry, closely related conditions in each task/context are placed at similar locations  
113 on low-dimensional manifolds; these manifolds in turn are approximately parallel to each other  
114 to allow generalization. On each manifold, different conditions within a task/context are placed  
115 sufficiently apart to allow maximal differentiation (Bernardi et al., 2020). To satisfy these  
116 conditions at the population level, the constituent single neurons must be tuned to combinations  
117 of several cognitive variables at once (“non-linear mixed selectivity”) (Rigotti et al., 2013). This  
118 set of clear theoretical predictions has been supported empirically to some extent by rare  
119 empirical studies in monkeys (Bernardi et al., 2020) and humans (Minxha et al., 2020), but has so  
120 far not been explored for the important topic of performance monitoring. Here, we examine the  
121 hypothesis that neuronal populations in the human MFC represent conflict, error, and estimated  
122 control demand in such a format, making them accessible to the many downstream domain-  
123 specific and domain-general processes we reviewed above.

124

125 Estimation of the statistical likelihood of environmental events is essential for efficient  
126 goal-directed behavior (Behrens et al., 2007; Jiang et al., 2015; Shenhav et al., 2013). A key aspect  
127 of this process is estimating the probability of encountering a situation where cognitive control  
128 will be needed (Jiang et al., 2015; Shenhav et al., 2013). Human participants engage reactive or  
129 proactive control depending on whether conflict is likely or not (Braver, 2012; Carter et al., 2000;  
130 Logan and Zbrodoff, 1979; Tzelgov et al., 1992). The former strategy is efficient when conflict is  
131 rarely encountered, whereas the latter is necessary when conflict occurs often (Braver, 2012).  
132 Neuroimaging studies have shown that the MFC encodes contexts that are implicitly defined by  
133 conflict probability (Carter et al., 2000), but it remains unknown how knowledge about such  
134 implicit contexts is acquired from the ‘trial-by-trial’ feedback provided by performance  
135 monitoring. Motivated by prior results (Behrens et al., 2007; Darlington et al., 2018; Jiang et al.,  
136 2015; Shenhav et al., 2013; Sohn et al., 2019), we here examine the hypothesis that human MFC  
137 neurons signal and continuously update the probability of encountering a control-demanding  
138 situation. Since the type of control triggered by different kinds of conflicts differs, this requires

139 representations that support both domain-specific as well as domain-general readouts.  
140 Estimating the expected frequency of each type of trial requires integrating information over the  
141 history of trials, offering the unique opportunity to examine the mechanisms whereby  
142 representations are maintained and updated over time. We model the trial-by-trial changes of  
143 activity of the neurons encoding estimated conflict probability as a Bayesian updating process, in  
144 which estimated priors are updated iteratively every time after an action is completed. We show  
145 that a novel type of conflict signal appears only after an action is completed and thereby provides  
146 the critical information for updating the conflict prior into a posterior.

147

148 We recorded single neurons in the MFC while human epilepsy subjects perform two  
149 different cognitive control tasks in blocks: the Multi-source Interference task (“MSIT”) (Bush and  
150 Shin, 2006) and the color-word Stroop task (“Stroop”)(Stroop, 1935). The causes of conflict and  
151 thus errors are different in the two tasks - stimulus-response spatial incompatibility (“Simon”  
152 effect) and/or stimulus conflict (“Flanker” effect) in the MSIT, and stimulus-response  
153 incompatibility due to reading colored words in the Stroop task. This allowed us to study how  
154 different sources of conflict are encoded within a single task and across tasks, and how errors are  
155 encoded across tasks. Subjects were instructed verbally and performed both tasks with little prior  
156 practice, which is critical to examine the underlying neural mechanisms (which might be different  
157 for extensively practiced tasks as is typically done in animals).

158

## 159 **Results**

160

### 161 *Task and behavior*

162 We recorded well-isolated single units in the dorsal ACC and pre-SMA, which are two  
163 areas within MFC associated with different aspects of performance monitoring. Subjects  
164 performed two speeded response tasks that require cognitive control: the multi-source  
165 interference task (MSIT) and the color-word Stroop task (Stroop) (**Fig. 1a** and **Methods**; Stroop:  
166 593 neurons in dACC and 607 neurons in pre-SMA across 32 participants (10 females); MSIT: 326  
167 neurons in dACC and 412 neurons in pre-SMA in 12 participants (6 females); some patients only

168 performed one of the tasks due to time constraints, **Table S1**). In the MSIT task (**Fig. 1a**, left),  
169 conflict arises due to incompatibility between target identity and target location (Simon conflict,  
170 or “si” trials) and/or distracting number identity (Flanker conflict, or “fl” trials; trials with both  
171 are referred to as “sf” trials). In the Stroop task (**Fig. 1b**, right), conflict arises due to  
172 incompatibility between ink color and semantic meaning of the displayed words. In both tasks,  
173 sequences of stimuli were randomized, with each type of trial occurring with a fixed probability  
174 (In Stroop, 33% of trials had conflict; In MSIT, 15%, 15% and 30% of trials had si, fl, and sf type of  
175 conflict, respectively). Subjects were encouraged to respond quickly by an adaptive response  
176 threshold (see **Methods**), ensuring maximal task engagement. The different stimulus-response  
177 mappings lead to different goal-relevant and irrelevant stimulus features and thus to different  
178 kinds of cognitive conflict and reasons for committing errors.

179 Reaction times (RT) were significantly prolonged in the presence of conflicts,  
180 demonstrating the Simon and Flanker effect in the MSIT task (**Fig. 1b**, left; average RT of 0.76s,  
181 0.86s, 0.93s, 1.03s for non-conflict, si, fl, and sf, respectively) and the Stroop effect in the Stroop  
182 task (**Fig. 1b**, right; Stroop: 0.76s vs 0.97s for non-conflict and conflict, respectively). We analyzed  
183 participants’ sequential performance (RT and accuracy) with a Bayesian online learning  
184 framework, building on existing models (Behrens et al., 2007; Jiang et al., 2014, 2015). Our  
185 models assume that participants iteratively estimate of how likely it is to encounter a certain type  
186 of conflict on the next trial. We refer to this variable as the prior for conflict probability (a real  
187 number between 0-1 referred to as ‘conflict prior’). Since trial sequences were randomized,  
188 subjects could not predict with certainty whether the upcoming trial involved conflict or not.  
189 However, they could estimate the conflict probability, which is a task parameter set by the  
190 experimenter whose value is unknown to the subject a priori. For MSIT, our models estimated  
191 two conflict probabilities (one for si, one for fl) at the same time, based on the finding that both  
192 conflicts influenced RT (**Fig. 1b**, left). The trial horizon by which past trials (“conflict history”)  
193 informed the current estimate was dynamically adjusted by a learning rate parameter, which was  
194 also estimated online from the data. In order to obtain an individual conflict prior for every  
195 subject (even if the trial sequence was identical), we tuned the iterative estimation model by  
196 incorporating RT information, using the expectation-maximization procedure described in prior

197 work (Friston, 2002; Jiang et al., 2015). We modelled the RT generation process as a drift-  
198 diffusion process (DDM), where the decision variable represents the *difference* in evidence for  
199 the target and distractor response; one bound thus represents the correct outcome whereas the  
200 other represents the erroneous outcome. This DDM likelihood function for RT is specified with  
201 three hyperparameters: decision bound, drift rates, and drift rate bias (Navarro and Fuss, 2009).  
202 Conflict prior entered the decision process by biasing the drift rate (Urai et al., 2019) (**Fig. 1c**,  
203 right; term  $v_{bias}$ ): the bias term was the scaled Stroop prior for the Stroop model and the sum of  
204 independently scaled Simon prior and the Flanker prior for the MSIT model. The same scaling  
205 parameters were used regardless of whether the trial had conflict or not because, by definition,  
206 the effect of conflict prior started before the trial congruency was revealed.

207 We estimated the hyperparameters of this model using an expectation-maximization  
208 algorithm (see **Methods** for details). Conflict probability was estimated iteratively by updating  
209 the current prior with the observed conflict type on each trial using the Bayes' law; the updated  
210 conflict posterior then served as the prior for the next trial. This online nature of the model  
211 captured how human subjects learned about the statistics of conflict trials as they were  
212 experienced sequentially. In the following analyses, we refer to the means of the prior and  
213 posterior distributions as conflict "prior" (before stimulus onset) or "posterior" (after action  
214 completion; **Fig. 1d** shows an example MSIT session). We considered two alternative classes of  
215 models with additional free parameters: 1) models estimating conflict probability (Stroop, Simon  
216 or Flanker) using all data at once instead of trial-by-trial updating; 2) reinforcement learning  
217 models that perform trial-by-trial updating using a constant learning rate. All of these alternative  
218 models required offline fitting using all data. Our RT-tuned Bayesian learning model performed  
219 significantly better than either class of alternative models in terms of explaining RT and the  
220 conflict sequence (**Tables S2 and S3** for a summary of model comparisons). Additionally, RT  
221 tuning significantly improved the Bayesian model in terms of explaining RT (**Table S2**, compare  
222 columns "RT tuned" and "no RT tuned"; MSIT delta BIC = -348.5; Stroop delta BIC = -508) and the  
223 trial congruency sequence (**Table S3**, compare columns "RT tuned" and "no RT tuned"; MSIT delta  
224 BIC = -157; Stroop delta BIC = -232). We thus used the RT-tuned Bayesian model for all neural  
225 analyses.



226 We next examined what aspects of behavior were related to the model-derived  
227 regressors (see **Fig. S2** for values of derived hyperparameters). First, in addition to current trial  
228 conflict, the estimated conflict prior had a significantly positive (i.e., an increase in RT) main effect  
229 on RT in both tasks (**Fig. 1e**;  $\chi^2(1) = 6.75$ ,  $p = 0.009$  for Simon and  $\chi^2(1) = 6.79$ ,  $p = 0.009$  for  
230 Flanker in MSIT;  $\chi^2(1) = 28.1$ ,  $p < 0.001$  for Stroop. Likelihood ratio test). The extent to which RT  
231 varied with the conflict prior depended on the type of conflict (in the case of MSIT, Simon and  
232 Flanker separately), as indicated by a significant negative interaction term ( $\chi^2(1) = 12.94$  for  
233 Simon and  $\chi^2(1) = 14.2$  for Flanker in MSIT;  $\chi^2(1) = 33.3$  for Stroop.  $p < 0.001$  for all conflict types.  
234 Likelihood ratio test). This relation between conflict prior and RT remained significant when trial  
235 ID was added as a nuisance variable (**Fig. S1a**), or when the conflict prior was estimated without  
236 RT tuning (**Fig. S1b**). These RT effects were replicated by online participants collected using  
237 Amazon mTurk as behavioral controls (**Fig. S1d**). Conflict prior was systematically related to  
238 errors: when conflict was likely, subjects were *less* likely to commit an error on this trial,  
239 suggesting that more control was engaged (**Fig. S1c**; for MSIT we only considered “sf” trials where  
240 most errors occurred; significant main effect  $\chi^2(1) = 6.81$ ,  $p = 0.009$  for MSIT; significant  
241 interaction with non-significant main effect  $\chi^2(1) = 18.59$ ,  $p < 0.001$  for Stroop. Likelihood ratio  
242 test). Prior work analyzes the influence conflict on the immediately preceding trial has on RT as  
243 a signature of cognitive control (Egner and Hirsch, 2005; Kerns et al., 2004). However, the  
244 robustness and generality of the conflict adaptation effect varies between studies (Duthoo et al.,  
245 2014; Egner, 2007; Schmidt and De Houwer, 2011) and is not the focus of our study. Rather, we  
246 here consider conflict learning effects that occur over the span of many trials and that exists  
247 independent of conflict adaptation, as shown in prior work (Jiang et al., 2015). In fact, in our data,  
248 conflict on the immediately preceding trial provided a poor estimate of conflict probability;  
249 compared to our model, previous trial conflict alone explained significantly less variance in RT  
250 (MSIT delta BIC = -365.6; Stroop delta BIC = -298.5; **Table S2**, compare columns “RT tuned” and  
251 “Prev conflict”), suggesting that our participants incorporated conflict information from multiple  
252 trials back. Collectively, these behavioral data from two tasks demonstrate that our models that  
253 estimate conflict probability online explained variance in RT and error likelihood, demonstrating  
254 a proactive engagement of control.

255

256 *Neuronal correlates of performance monitoring signals*

257

258 We focused on three types of epochs for analyses (**Fig. 3a**): baseline before stimulus onset,  
259 a 500ms epoch centered at the mid-point between 100ms after stimulus onset and button  
260 presses (“ex-ante”), and epochs immediately following button presses (“ex-post”). To assess  
261 whether signals relevant for performance monitoring are represented in each epoch, we  
262 classified neurons by cognitive variables important for performance monitoring. We identified  
263 neurons selective for prior mean or prior variance in the baseline period, for conflict in the ex-  
264 ante and ex-post period, and for error, surprise, posterior, and posterior variance in the ex-post  
265 period (see single-unit examples in **Fig. 2**; schematic of analysis epochs in **Fig. 3a**; and a summary  
266 of overall cell counts in **Fig. 3b**). In MSIT, in order to isolate effects related to the Simon conflict,  
267 we refer to the union of “si” and “sf” trials as “Simon trials” and the union of “fl” and no-conflict  
268 trials as “non-Simon trials”. Similarly, to isolate the effect of Flanker conflict we refer to the union  
269 of “fl” and “sf” trials as “Flanker trials”, and the union of “si” and no-conflict trials as “non-Flanker  
270 trials”. Except when noted otherwise, we pooled neurons across dACC and pre-SMA because  
271 neuronal responses were similar across areas (**Fig. S3a-b**).

272 Single units tracked aspects of performance monitoring in both tasks (single-unit  
273 examples in **Fig. 2**; summary in **Fig. 3b**). During the baseline epoch, a significant proportion of  
274 neurons encoded the mean or the variance of the prior distribution for conflict probability (**Fig.**  
275 **3b**, blue). In the ex-ante epoch, a significant proportion of neurons encoded conflict (15% in MSIT  
276 and 12% in Stroop; **Fig. 3b**, green), consistent with previous reports (Fu et al., 2019; Sheth et al.,  
277 2012). In the ex-post epoch (**Fig. 3b**, yellow), neurons encoded conflict (20% in MSIT; 17% in  
278 Stroop), conflict surprise (19% in MSIT; 10% in Stroop), occurrence of errors (22% in MSIT; 19%  
279 in Stroop), and the mean and variance of posterior distribution of conflict probability (14/26% in  
280 MSIT; 20/12% in Stroop). The signal we refer to as conflict surprise is an unsigned conflict  
281 prediction error generated by the experienced conflict given the current prior estimate, a critical  
282 component in computing the posterior from the prior (see below). The percentage of units  
283 selective for a given variable were similar between the two tasks (**Fig. 3b**).

284 Many identified neurons showed selectivity for more than one cognitive variable (**Fig. 3c-**  
285 **d**), suggesting a role in bridging different types of information. Approximately 30% of conflict  
286 neurons were active *exclusively* in either the ex-ante, early (0-0.5s after button presses) or late  
287 (0.5-1.5s after button presses) ex-post epochs (**Fig. 3c**), with some (~12%) active throughout the  
288 trial after stimulus onset (“extended”). The distribution of conflict signals across time was  
289 strikingly similar between MSIT and Stroop (**Fig. 3c**, compare left and right). We were particularly  
290 intrigued by the prominence of neurons signaling conflict ex-post (15-20% of neurons in both  
291 tasks; **Fig. 2c** shows an example), which has not been reported before. This conflict signal, whose  
292 timing was too late to be useful for within-trial cognitive control, was more prominent compared  
293 to the one found in the ex-ante epoch in both tasks (15% vs 20%,  $\chi^2(1) = 5.08$ ,  $p = 0.024$  for MSIT;  
294 12% vs 16%,  $\chi^2(1) = 9.19$ ,  $p = 0.0024$  for Stroop, chi-squared test). We note that signaling conflict  
295 “after the fact” is predicted by our Bayesian conflict learning framework, in which this ex-post  
296 conflict serves as the conflict “outcome” signal indicating that the trial was not only *correct* but  
297 also with or without conflict, information necessary for computing the conflict posterior from the  
298 prior. We found that many conflict neurons also signaled errors, surprise, posterior, or  
299 combinations of these variables (for example, signaling conflict, error, and posterior at the same  
300 time) (**Fig. 3d**). This multiplexing of signals depended on the timing of conflict signals. The  
301 proportion of conflict neurons that also carried information about the posterior (light green bars)  
302 increased significantly towards the end of the ex-post epoch, when updating would be most  
303 complete and thus the conflict posterior was computed (compare proportion of conflict neurons  
304 that multiplexed posterior information in the late ex-post epoch with those that do so in other  
305 epochs;  $\chi^2(1) = 6.14$ ,  $p = 0.01$  for MSIT;  $\chi^2(1) = 6.22$ ,  $p = 0.01$  for Stroop, chi-squared test).  
306 Consistent with this idea, the group of neurons signaling conflict exclusively in the ex-ante epoch  
307 (“ex-ante conflict only”) showed the least multiplexing, indicating a primary role in monitoring  
308 conflict during action production (proportion of “pure” conflict neurons active only during the  
309 ex-ante epoch vs. those that are active in other epochs;  $\chi^2(1) = 5.31$ ,  $p = 0.02$  for MSIT;  $\chi^2(1) =$   
310  $8.78$ ,  $p = 0.003$  for Stroop, chi-squared test). Additional evidence for a differential role of ex-ante  
311 and ex-post conflict signals is provided by comparing the point in time when these signals were  
312 first available in each brain area. Here, we extracted for each *conflict* trial the point in time when

313 spike train was first significantly modulated for ex-ante and ex-post conflict neurons (using a  
314 Poisson spike train statistics-based approach (Hanes et al., 1995)). By this measure, ex-ante  
315 conflict information was first available in dACC, followed by pre-SMA (**Fig. 3e**; median difference  
316 = 138ms;  $p < 0.001$ , Wilcoxon rank sum test). By contrast, ex-post conflict information was  
317 available first in pre-SMA, followed by dACC (**Fig. 3e**; median difference = 161ms;  $p = 0.002$ ,  
318 Wilcoxon rank sum test). This pattern is consistent with a leading role of pre-SMA in post-action  
319 performance monitoring (Fu et al., 2019), and a leading role of dACC in conflict monitoring during  
320 action production. Collectively, these ex-post neuronal responses appeared to reflect the process  
321 of updating internal estimates of conflict probability based on present trial outcome as signaled  
322 by conflict and error neurons. We next tested this hypothesis.

323       Posterior neurons demonstrated the greatest degree of multiplexing (**Fig. 3f**). Only ~18%  
324 of posterior neurons signaled posterior exclusively, with the remainder in addition also signaling  
325 prior, conflict, surprise, or a mixture of these. This extensive overlap between posterior signals  
326 and each of these ex-post constituents might reflect the computation of the conflict posterior,  
327 which would involve all these variables. We next tested whether prior neurons (which are  
328 selected during the baseline period) changed their spike rates to reflect the updating process in  
329 the ex-post epoch (1s after button press). If a neuron correlates with prior on a trial-by-trial basis  
330 and the prior is updated into the posterior after each action, the spike rates of this neuron should  
331 reflect this updating. As a neural measure of updating, we used the difference of mean-removed  
332 firing rates in two epochs: the early ex-post epoch (1s after button presses) and the baseline. As  
333 a behavioral measure of updating, we used the numerical difference between posterior and prior  
334 means as estimated by the Bayesian models. We then correlated these two trial-by-trial  
335 measures for each prior neuron. Across all prior neurons, correlation was significantly positive  
336 for all types of conflict priors (**Fig. 3g**,  $p < 0.001$ , t test against zero. Mean correlations in Simon,  
337 Flanker and Stroop are 0.042, 0.032, 0.065, respectively). This result indicates that prior neurons  
338 changed their spike rates in the early ex-post epoch, where the conflict outcome was revealed,  
339 to reflect the updated posterior. Together, these data demonstrate that a potential role for the  
340 ex-post monitoring signals is to update an online estimate of conflict probability.

341

342 Event-related potentials that reflect activity of prior cells

343

344 The intracranial EEG data recorded simultaneously with the single units revealed an event  
345 related potential following button presses on correct trials (**Fig. 3h**; “CRP”, or correct-related  
346 potentials). Event-related potentials (ERPs) reflect synchronous postsynaptic potentials of  
347 cortical pyramidal neurons within the cortical microcircuitry (Buzsáki et al., 2012; Herrera et al.,  
348 2020; Woodman, 2010). Similar to the ex-post neurons we investigated, CRPs on average  
349 followed button presses, had larger amplitude on conflict trials compared to non-conflict trials  
350 (**Fig. S3c**,  $\chi^2(1) = 21.05$ ,  $p < 0.001$ , likelihood ratio test) and showed an interaction effect between  
351 trial congruency and conflict prior (a measure of conflict surprise;  $\chi^2(1) = 8.48$ ,  $p < 0.001$ ,  
352 likelihood ratio test), carrying population-level information important for updating conflict prior.  
353 We thus hypothesized that these prominent ERPs might represent inputs for the prior neurons  
354 recorded simultaneously. We tested whether variance in the spike counts of prior neurons could  
355 be explained by the CRP amplitude for each point in time across the trial (mixed-effect Poisson  
356 regression models tested with likelihood ratio test, see methods). We investigated dACC and pre-  
357 SMA separately, consistent with our previous work (Fu et al., 2019). We found that the activity  
358 of prior neurons in both dACC and pre-SMA around button presses was significantly correlated  
359 with the CRP amplitude on a trial-by-trial basis (**Fig. 3i-j**, Poisson mixed-effect regression model,  
360 which included RT and prior as nuisance variables.  $p < 0.01$  for all time bins marked by black dots  
361 on top, likelihood ratio test. Multiple comparisons were corrected for using the false-discovery  
362 rate method), but with earlier onset in dACC than in pre-SMA (0s vs 0.325s after button presses).  
363 This indicates that the CRP amplitude (which occurs in the ex-post period) predicted the activity  
364 of prior neurons around button presses on a trial-by-trial basis, revealing a neuronal correlate for  
365 this prominent ERP.

366

367 Biophysical basis for encoding of prior/posterior

368

369 Estimating priors/posteriors in our task necessitates the integration and maintenance of  
370 information across multiple trials, a non-trivial property of neural circuitry (Wang, 2002). We

371 therefore investigated whether the functional properties of neurons that encoded priors differed  
372 from those that did not. The metrics we used was the temporal correlation profile of baseline  
373 spike counts across trials and the width of the extracellular waveform. We chose these properties  
374 because the autocorrelation of spike counts at rest of PFC neurons predicts a neuron's  
375 participation in working memory (Cavanagh et al., 2018) as well as value coding (Cavanagh et al.,  
376 2016), and PFC neurons that encode past reward outcomes have narrower waveforms (Kawai et  
377 al., 2019). The timescale of autocorrelation we sought to investigate here is over the span of  
378 minutes (multiple trials). To this end, we employed Detrended Fluctuation Analysis (DFA) (Peng  
379 et al., 1994) to quantify the self-similarity of baseline spike counts for each neuron, treating the  
380 trial-by-trial baseline spike counts as time series data. DFA provides a measure of self-similarity  
381 closely related to the slope of the power spectrum (and thus the autocorrelation), but without  
382 assuming stationarity. A DFA  $\alpha$  value greater than 0.5 indicates a positively correlated process,  
383 whereas  $\alpha = 0.5$  indicates an uncorrelated process. We found that in both tasks, neurons  
384 representing priors had significantly higher DFA  $\alpha$  values compared to other categories of  
385 neurons (**Fig. 4a-b**, left panels;  $p < 0.001$ , ANOVA), with DFA  $\alpha$  positively correlated with the  
386 strength of prior information carried by a particular neuron (**Fig. 4a-b**, right panels;  $p < 0.001$ ,  $r =$   
387 0.24 for MSIT,  $p < 0.001$ ,  $r = 0.21$  for Stroop, Spearman's rank correlation. Separate data were  
388 used for computing these two metrics, see **Methods** for detail).

389 We next investigated the relation between a neuron's tendency for long-term  
390 maintenance of information (as indicated by  $\alpha > 0.5$ ) and its spike width, a biophysical measure  
391 that differs between different types of cells (Bean, 2007; Mosher et al., 2020). The relation  
392 between DFA  $\alpha$  value, autocorrelation, slope of the power spectrum, and spike width can be seen  
393 in the two example neurons shown in **Fig. 4c-f**. The orange neuron, which had a  $\alpha = 0.91$ , had a  
394 narrower spike waveform, larger autocorrelation and steeper power spectrum slope than the  
395 gray neuron with  $\alpha = 0.54$ . Across all recorded neurons in both tasks, DFA  $\alpha$  values were  
396 negatively correlated with spike width (**Fig. 4g-h**;  $r = -0.19$  in MSIT,  $r = -0.12$  in Stroop,  $p < 0.001$   
397 in both cases, Spearman's rank correlation). Neurons encoding conflict prior/posterior, which  
398 requires long-term maintenance, in either task had significantly narrower spike waveforms than  
399 all other recorded neurons (**Fig. 4g-h**, right;  $p < 0.001$ , Wilcoxon's rank sum test). Taken together,

400 these data establish that the long-range temporal correlation of baseline spike counts is an  
401 intrinsic firing property of neurons that was predictive of the neuron's spike width as well as the  
402 encoding strength of conflict prior/posterior. Neurons that represent conflict priors/posteriors  
403 appear to be biophysically distinct and of a different cell type from those that do not code such  
404 information, due to their systematically different extracellular waveform and firing properties.

405  
406

### 407 Temporal progression of performance monitoring signals

408

409 Given the diversity of firing dynamics seen at the single neuron level (**Figs. 2 and 3**), we  
410 next examined the temporal dynamics and robustness of performance monitoring signals at the  
411 population level using decoding. We used linear classifiers that had access to *all* recorded  
412 neurons, which represents a conservative measure of information available to downstream  
413 neurons (Fusi et al., 2016). We first focused on within-time decoding (i.e., training and testing a  
414 decoder using data collected in the same epoch). Error, conflict, prior and posterior could be  
415 decoded reliably on single trials with high cross-validated accuracy (**Fig. 5a-g** and **Fig. S5a-d**,  
416 dotted traces or dotted square shows within-time decoding accuracy). In both tasks, the error  
417 signal was decodable with high accuracy throughout the whole ex-post epoch, consistent with  
418 our previous report of its role in mediating post-error RT adjustments (Fu et al., 2019) (**Fig. 5a-b**,  
419 dotted line). Decoding performance of conflict in both tasks peaked first in the ex-ante epoch  
420 (**Fig. 5c-e**, dotted line in the green shading) and then again in the early ex-post epoch (**Fig. 5c-e**,  
421 dotted line in the orange shading), before gradually decreasing towards the end of the trial. This  
422 time course is consistent with a putative role in estimating conflict probability: conflict is first  
423 monitored before committing to a response (ex-ante), followed by a representation of the  
424 detected conflict as an outcome signal after button press (ex-post).

425 We next investigated whether the neural code changed over time by using cross-temporal  
426 generalization analysis (i.e., training and testing a decoder in different periods of time). We tested  
427 the temporal generalization performance of error and conflict decoders trained using data from  
428 three defined ROIs: the ex-ante epoch (0.5s; green shading), the early ex-post epoch (0-0.5s after

429 button presses; orange shading) and the late ex-post epoch (0.75-1.25s after button presses; blue  
430 shading). In terms of error coding, the early ex-post decoder generalized poorly to later periods  
431 (**Fig. 5a-b**; orange line) whereas the late ex-post decoder generalized well across early and late  
432 ex-post epochs (**Fig. 5a-b**; blue line). This interesting asymmetry in generalization suggests that  
433 there are two groups of error neurons, one signaling errors strongly but transiently, and one  
434 signaling error persistently throughout the entire ex-post epochs. In terms of conflict coding,  
435 population decoders performed well only within the training epochs but generalized poorly to  
436 other epochs for both tasks and all types of conflict (**Fig. 5c-e**), suggesting a dynamic coding  
437 patterns for conflict that changed rapidly as the trial unfolds. In particular, the ex-ante decoder  
438 did not decode conflict above chance in the ex-post epochs (green traces in **Fig. 5c-e**). This  
439 confirms our single neuron findings that the ex-post conflict signals were not simply a  
440 continuation of ex-ante conflict signals, but rather signals carried by different groups of neurons  
441 at different points in time.

442 For the population coding patterns of prior/posterior, we took a region of interest (ROI)  
443 approach given their slow-varying nature, using the baseline and ex-post epochs for prior and  
444 posterior, respectively. Since the conflict priors are continuously valued and differed between  
445 sessions, we binned trials using quartiles of conflict prior to aggregate data across sessions  
446 (labelling trials by four prior levels). We also binned the trials by quartiles of posterior for  
447 posterior-related analyses (labelling trials by four posterior levels). We then trained a linear  
448 decoder to differentiate between priors/posteriors of two different quantiles. The prior and  
449 posterior decoder could differentiate between all pairs of prior/posterior quantiles with high  
450 accuracy (**Fig. 5f-g** and **Fig. S5a-d**; within-ROI decoding, upper or lower triangular matrices  
451 enclosed by dotted boxes), with accuracy scaling with the distance between pairs of quartiles  
452 (i.e., higher accuracy for differentiating 1<sup>st</sup> vs. 4<sup>th</sup> than for 1<sup>st</sup> vs. 2<sup>nd</sup> levels). The prior decoders  
453 are able to decode all pairs of posterior levels with high accuracy and vice-versa (**Fig. 5f-g** and **Fig.**  
454 **S5a-d**, plots *not* enclosed by dotted boxes), indicating that the representation of prior/posterior  
455 is stable across time.

456 Decoding performance for error, conflict and prior/posterior had similar temporal profiles  
457 in both dACC and pre-SMA, but with higher decoding accuracy in pre-SMA (**Fig. S4a-e**). Notably,



458 conflict in the immediately preceding trial could be decoded only weakly (lower than 60% in  
459 accuracy) in the baseline, as expected, and in the early ex-post epoch for Stroop conflict (**Fig. S5e-**  
460 **g**). The weak representation of previous conflict is consistent with our observation that the  
461 previous conflict alone was a poor predictor of RT compared to the conflict prior (**Table S2**).  
462 Together, these data demonstrate that error, conflict and prior/posterior information can be  
463 read out trial-by-trial from the MFC population with high accuracy, with dynamic coding patterns  
464 for conflict and error and static coding patterns for prior/posterior.

465

#### 466 *State-space representation of conflict*

467

468 We have shown robust encoding of each of the four conflict types involved in both tasks  
469 (sf, fi, sf, Stroop) separately, leaving open the question of how the different encoding schemes  
470 are related to each other. Are the different types of conflict encoded along a common ‘conflict’  
471 axis or are they encoded separately with no generalization between the types of conflict? We  
472 tested this question in the MSIT task, which has three types of conflict (Simon, Flanker, both). We  
473 took as a putative common conflict coding dimension the line that, in neural state space,  
474 connects the neural state during “sf” and “none” trials (both conflict vs. no conflict; **Fig. 6a-b**,  
475 dotted lines). Projecting left-out single trials from all four trial types onto this coding dimension  
476 allowed differentiation between all pairs of conflict conditions in the ex-ante epoch (**Fig. 6b**, left).  
477 and all pairs but one (si vs. sf) in the ex-post epochs (**Fig. 6b**, right). Importantly, this result holds  
478 even when RT was equalized across the four conflict conditions (**Fig. S6c**; si, fl, sf, non-conflict.  
479 See **Methods** for RT equalization procedure), suggesting that this conflict coding dimension was  
480 independent of trial difficulty for which RT is a proxy (Gratton et al., 1992). We next investigated  
481 whether Simon and Flanker conflict encoding is related to each other by projecting the activity  
482 of single trials onto the coding dimension formed by connecting, in the neural state space, the  
483 mean of Simon (si+sf) with the mean of non-Simon (fl+none) separately for each time bin (and  
484 vice-versa for Flanker (fl+sf) vs non-Flanker (si+none)). Data for testing were held out (not used  
485 for constructing the coding dimensions). Coding dimensions for one type of conflict allowed  
486 decoding of the other type of conflict with high accuracy (**Fig. 6c**; black trace, coding dimension

487 of Flanker tested with Simon vs. non-Simon; gray trace, coding dimension of Simon tested with  
488 Flanker vs. non-Flanker). Together, these data demonstrate that within a single cognitive task,  
489 the MFC population formed a conflict representation that generalized across two types of conflict  
490 while at the same time also allowed maximal separation between the different types of conflict,  
491 a geometry that supports both abstraction as well as task-specific specialization (Bernardi et al.,  
492 2020).

493         When two types of conflict coincide on a trial (“sf” trials in MSIT), is the neural state  
494 occupied equal to the sum of the two states occupied by the components (“si” and “fl”)? In other  
495 words, is the Simon and Flanker representation compositional? Perfect compositionality implies  
496 that the vectors for the four trial types (“si”, “fl”, “none”, “sf”) are coplanar and form a  
497 parallelogram, with the “sf” vector being the diagonal and the opposite sides being parallel to  
498 each other (**Fig. 6a-b**). We tested this prediction of parallelism (**Fig. 6a-b**, orange edges and blue  
499 edges, respectively) using decoding. If the opposing sides are parallel, a decoder trained to  
500 differentiate the two classes connected by one edge should be able to decode two classes  
501 connected by the opposite edge (and vice-versa). We found that this was largely the case for both  
502 ex-ante and ex-post conflict representation: a decoder trained to differentiate “sf” from “fl” trials,  
503 which is simply the axis connecting “sf” and “fl” (orange edge in **Fig. 6a**), was able to differentiate  
504 “si” from non-conflict trials projected to this axis above chance, and vice versa (**Fig. 6d**,  $p < 0.001$   
505 for both the ex-ante and ex-post data, permutation test). The same was true for the other pair  
506 of parallel edges (**Fig. 6d**, testing blue edges in **Fig. 6a**;  $p < 0.001$  for both the ex-ante and ex-post  
507 data, permutation test). The parallelism was not perfect because the decoding accuracy, while  
508 above chance, was relatively low ( $< 70\%$ ) compared to the performance reached when decoding  
509 individual types of conflict (**Fig. 6c**). This structure of the representation was disrupted on error  
510 trials, in which generalization performance dropped significantly in the ex-ante (**Fig. S6d**; for both  
511 edges, 68% and 58% on correct trials vs. 56% and 47% on error trials) as well as the ex-post epoch  
512 (**Fig. S6d**; for both edges, 55% and 66% on correct trials vs. 51% and 59% on error trials) on error  
513 trials. Lastly, we examined which neurons contributed to the deviation that keeps the axes from  
514 being perfectly parallel and thus perfectly compositional, which was assessed by the mismatch  
515 between the actual location of “sf” and the predicted location by vector addition of fl + si.

516 Neurons that encoded Simon and Flanker non-linearly (as measured by the F statistic of the  
517 interaction term between Simon and Flanker derived from an ANOVA model) contributed the  
518 most to the deviation from linear additivity at the population level (**Fig. 6e**,  $r = 0.74$ ,  $p < 0.001$ ,  
519 for ex-post data; **Fig. S6e**,  $r = 0.75$ ,  $p < 0.001$ , for ex-ante data; Spearman's rank correlation).  
520 Collectively these data suggested that in the MSIT task, neural representations of conflict were  
521 structured in a compositional way that separated the four conflict conditions in a parallelogram.  
522 This geometry was disrupted on error trials, indicating that this representation was behaviorally  
523 relevant.

524

### 525 State-space representation of prior/posterior

526

527 We reasoned that the conflict prior can be viewed as a state (an initial condition) that is  
528 present before stimulus and to which the population returns after completing a trial. To test this  
529 idea, we again binned trials using quartiles of prior/posterior of each trial (labelling trials with 4  
530 prior or posterior levels) and aggregated data across the population. Plotting the neural dynamics  
531 in a low-dimensional space spanned by three principal components with largest variance  
532 explained (PCA is unsupervised and has no access to the ordinal relation between prior/posterior  
533 levels) revealed that the variability across different levels of prior/posterior (~8% of variance) was  
534 captured mostly by a single axis (PC3s in **Fig. 6f-h**; green dots mark trial start, red dot trial end),  
535 which was orthogonal to most of the time-dependent state changes (captured by PC1s and PC2s,  
536 ~68% of variance). During the baseline period (green to cyan dots in **Fig. 6f-h**) neural state  
537 changed with low speed (**Fig. 6i** and **Fig. S6f-g**), whereas the speed of changed increased  
538 significantly after stimulus onset (**Fig. 6i** and **Fig. S6f-g**, red;  $p < 0.001$ , paired t-test), eventually  
539 returning to baseline near the starting position (red dots in **Fig. 6f-h**). The distance between the  
540 four trajectories was kept approximately constant at all time (**Fig. 6i** and **Fig. S6f-g**), consistent  
541 with the levels of prior/posterior being states stably maintained at the individual trial level.  
542 Remarkably, the state-space trajectories are not only stable but also preserves the ordinal  
543 relation between prior/posterior levels: projection values onto the PC that captured the most  
544 variance across prior/posterior levels were arranged in an order consistent with the

545 prior/posterior levels, even though PCA did not have access to such ordinal information (**Fig. 6j-**  
546 **I**, see **Legends** for statistics of the multinomial logistic regression). Taken together, the MFC  
547 representation of the conflict prior/posterior information is low-dimensional, stable across time  
548 and parametric, consistent with the dynamics of line attractors.

549

#### 550 Domain-general performance monitoring signals at the population

551

552 What was the relationship between the performance monitoring signals we documented  
553 separately in the MSIT and Stroop tasks? Did neurons specialize in encoding a given signal in only  
554 a given task or did neurons form a domain-general representation across tasks? If the latter, was  
555 this representation abstract in the sense that information about the task identity or task-specific  
556 conditions (e.g., the different types of conflicts in MSIT) were no longer available? To answer  
557 these questions, we next analyzed a subset of data in which we tracked the same neuron in both  
558 Stroop and MSIT (see **Table S1** for a tally of recordings). Note that participants had no knowledge  
559 of the second experiment they were going to perform when they performed the first (which was  
560 either MIST or Stroop), thereby allowing us to ask how two novel tasks with no prior practice  
561 engaged MFC. We used demixed PCA (dPCA) (Kobak et al., 2016) on the neural activity recorded  
562 across both tasks to identify coding dimensions for error, conflict and conflict prior/posterior  
563 which were stable across time and with task information maximally marginalized out. Namely,  
564 the goal is to factorize data into performance monitoring signals, non-specific temporal dynamics  
565 as well as signals related to task sets (see **Methods** for details). To match the number of  
566 conditions between tasks, we picked non-conflict and “sf” trials in MSIT and non-conflict and  
567 Stroop trials in the Stroop task to construct the task-invariant conflict dimension. To assess  
568 whether the extracted coding dimensions were meaningful statistically, we used them to decode  
569 left-out data that were not used to construct these dimensions. To test generalization across  
570 tasks, we first projected both left-out training and testing data onto a dPCA dimension, and then  
571 classified the testing data in task using training data from the other task.

572 We found that the dPCA task-invariant coding dimensions identified this way explained  
573 between 9-12% of the variance and allowed training of a decoder in one task and testing it in the

574 other with high accuracy (**Fig. 7a-c**; > 80% accuracy for error and conflicts). To quantify the extent  
575 of “demixing” of performance monitoring signals from task set information, we computed the  
576 angle between the task invariant coding dimensions and their corresponding task dimension. The  
577 error dimension supported task-invariant decoding of error throughout the ex-post epoch (**Fig.**  
578 **7a**; significant clusters see horizontal bars;  $p < 0.001$ , cluster-based permutation tests). The angle  
579 between the error coding dimension and the task dimension was  $94.47^\circ$  and did not deviate  
580 significantly from orthogonality ( $p = 0.53$ ,  $\tau = -0.032$ , Kendall rank correlation). The conflict  
581 dimension supported task-invariant decoding in the ex-ante and the early ex-post epoch (**Fig. 7b-**  
582 **c**; significant clusters see horizontal bars;  $p < 0.001$ , cluster-based permutation tests). The angles  
583 between Stroop-Simon conflict coding dimensions and the task dimension were  $81.13^\circ$ , which  
584 did not differ significantly from orthogonality ( $p=0.19$ ,  $\tau = 0.048$ , Kendall rank correlation). The  
585 angles between Stroop-Flanker conflict coding dimensions and the task dimension were  $78.6^\circ$ ,  
586 which deviated weakly from orthogonality ( $p=0.02$ ,  $\tau = 0.086$ , Kendall rank correlation). This  
587 task generalizability did not compromise the capacity of this coding dimension to separate  
588 different kinds of conflict within MSIT: classifiers could differentiate between 5 out of 6 pairs of  
589 conflict conditions with high accuracy (60% - 90%) in both the ex-ante and ex-post periods based  
590 on data projected onto the task-invariant dPCA conflict axes (**Fig. 7d**;  $p$  values see figure legend,  
591 permutation tests). As a control, we repeated all above dPCA decoding analyses using trial  
592 conditions equalized by RT (e.g., selecting conflict and non-conflict trials that had similar RTs) and  
593 obtained very similar findings (**Fig. S7a-d**). These results suggests that task-invariant  
594 representation of error and conflict did not result from the coincidental condition differences in  
595 difficulty for which RT is a proxy (Gratton et al., 1992).

596 Similarly, the representation of conflict priors and posteriors also allowed task-invariant  
597 decoding of this information while at the same time differentiation between 94% of pairs of  
598 prior/posterior levels in both tasks (**Fig. 7e-f**;  $p$  values see figure; permutation tests). None of the  
599 coding dimensions for conflict prior or posterior were significantly non-orthogonal with the task  
600 dimension (angles and Kendall’s  $\tau$  values see **Legend**;  $p > 0.2$  for all, Kendall rank correlation),  
601 suggesting that the coding dimensions identified for conflict prior or posterior were significantly  
602 “demixed” from the task set dimension, a complete factorization. Consistent with this, the task

603 dimension support decoding of which task a trial was from with very high accuracy (>90% leave-  
604 one-out accuracy,  $p < 0.001$  by permutation tests). Together, these data demonstrate that the  
605 neural representation of performance monitoring signals in MFC is configured in such a way that  
606 it supports generalizability between two different tasks while at the same time also allowing the  
607 readout of task-specific information.

608

### 609 *Domain-general performance monitoring signals at the single-neuron level*

610 What gave rise to the flexible coding scheme that supported both task-invariant and task-  
611 specific readouts as revealed above? Was this a population level phenomenon or did individual  
612 neurons encode a given variable reliably in both tasks? To answer this question, we quantified  
613 cross-task coding stability for each neuron using linear regression (see **Methods**). To do so, we  
614 pooled data from both tasks and regressed firing rates against a performance-monitoring  
615 variable (error, conflict, prior or posterior), a task indicator, and an interaction term  
616 (performance monitoring x task). The statistical significance for each regressors were determined  
617 by an F test. We refer to neurons that had a significant main performance-monitoring effect but  
618 non-significant interaction as “task invariant”, and to neurons that had a significant “performance  
619 monitoring x task” interaction as “task dependent” neurons. We selected neurons whose  
620 response signaled conflict in ex-ante and ex-post epochs, error in the ex-post epoch, prior in the  
621 baseline epoch, and posterior in the ex-post epoch.

622 Out of the selected neurons of each kind (error, conflict, prior), 33-68% were classified as  
623 task invariant (**Fig. 7g-j** and **Fig. S7g-k**, red in pie charts). The extent to which a given neuron  
624 encoded a performance-monitoring variable by itself (assessed by t statistic for the main effect)  
625 and as part of a population (as derived by weight assigned to the neuron by the identified  
626 common dPCA coding dimensions) correlated significantly (**Fig. 7g-j**, scatter; see **Legend** for  
627 statistics), with the signs of these measures agreeing with each other in most cases (**Fig. 7g-j** and  
628 **Fig. S7 g-k**; for cases where signs differed, see **Fig. S7i-j**). Our dPCA analyses marginalized out  
629 information about task and time. As a result, neurons selective during either the ex-ante and/or  
630 ex-post epochs contributed to the identified common axis and their contribution were thus  
631 analyzed separately. On average, neurons identified as “task invariant” or “task dependent” were

632 assigned significantly larger absolute dPCA weights than non-selective neurons (“others” neurons)  
633 (**Fig. 7g-j** and **Fig.S7g-k**, dot density plots on the right). While “task-invariant” neurons in many  
634 cases had numerically larger dPCA weights than “task-dependent” neurons, on average they did  
635 not contribute significantly more to the task-invariant coding dimensions (**Fig. 7g-j** and **Fig.S7 g-**  
636 **k**, dot density plots on the right; see **Fig. S7g-k** for the case where task-invariant neurons  
637 contributed significantly more than task-dependent neurons). This illustrates how the diversity  
638 of encoding schemes at the single neuron level gave rise to a population-level one-dimensional  
639 coding dimension that supports a robust domain-general readout of performance monitoring  
640 signals with high accuracy in both tasks (**Fig. 7a-f** and **Fig. S7a-f**). A downstream neuron receiving  
641 input from MFC could in theory derive domain-general performance monitoring signals simply  
642 by taking a linear sum and thresholding, with the weights equal to those assigned by dPCA.

## 643 **Discussion**

644

645           We found that neurons in the human MFC represent estimated control demand (conflict  
646 prior) during the baseline, conflict during action production, and conflict outcome and error  
647 immediately after an action was performed in both the Stroop and MSIT tasks. A Bayesian conflict  
648 learning model that updated conflict probability iteratively after every trial predicted the  
649 existence of a novel kind of outcome signal (ex-post conflict signals) and neurons signaling  
650 estimated conflict probability, and we identified neurons encoding both of these cognitive  
651 variables. Single neurons encoded a diverse array of variables: some neurons encoded conflict,  
652 error and conflict prior/posterior in a task-invariant way, some encoded these variables  
653 exclusively in one task but not the other, and some multiplexed task information to varying  
654 degrees. Neurons with different encoding profiles were randomly and homogeneously sampled  
655 within MFC with no apparent clustering. Such interdigitated representation patterns would be  
656 difficult to detect with fMRI because even one voxel aggregates the activity from hundreds of  
657 thousands of neurons. This complexity at the level of single neuron responses precludes a clear  
658 interpretation of domain generality or domain specificity and instead requires an analysis of  
659 population-level representations in a high-dimensional state-space. The key insight in this study  
660 is that the representational geometry of performance monitoring takes advantage of this  
661 complex pattern of single neuron responses. Neuronal populations in the human MFC  
662 represented performance monitoring signals in a geometry that allows domain-general readout  
663 across tasks, while simultaneously also allowing linear decoders to extract task-specific details.  
664 Achieving this tradeoff, in turn, requires that the constituent single neurons multiplex  
665 information about the different variables required (i.e., show mixed selectivity).

666

### 667 **Domain-general performance monitoring**

668

669           The evidence for domain generality of performance monitoring from neuroimaging  
670 studies is mixed. Some studies conclude that representations of conflict are domain-general from  
671 spatially overlapping BOLD activation maps, but the extent of such overlap could depend on the



672 statistical thresholding used (Fan et al., 2003; Liu et al., 2004). Using multi-voxel pattern analysis  
673 (MVPA) that avoids statistical thresholding, one study finds voxel clusters that simultaneously  
674 encode different types of conflict in the superior frontal gyrus (Jiang and Eger, 2014). However,  
675 the majority of conflict-encoding voxel clusters, notably those found in dACC, are specific to one  
676 particular type of conflict; domain-general and domain-specific clusters are distributed in distinct  
677 anatomical locations. Direct comparisons between single-unit recordings and BOLD-fMRI have  
678 demonstrated that the former can exhibit multivariate representations that cannot be detected  
679 with fMRI (Dubois et al., 2015). Additional difficulty for neuroimaging studies is the variation in  
680 human cingulate anatomy, which reduces the overall signal resolution when registering to a  
681 common template brain (Crosson et al., 1999; Vogt et al., 1995) (a constraint our work does not  
682 suffer from since we mapped anatomy in individual brains). In the present study we find that it  
683 is the *same* group of neurons within MFC that form a geometry allowing the readout of both  
684 domain-general and domain-specific conflict signals. The conflict representation we discovered  
685 not only generalizes between two types of conflict involved within a single task (which was found  
686 with MVPA-fMRI as well (Jiang and Eger, 2014)), but also between two tasks with completely  
687 different stimuli, response requirements, and task rules. A key component of performance  
688 monitoring is the ability to detect action errors without relying on external feedback. This type  
689 of self-monitoring is a central component of metacognition (Yeung and Summerfield, 2012). In  
690 the case of confidence judgments, which are also metacognitive, fMRI results indicate that the  
691 same parts of MFC are involved across different cognitive domains (perception or memory,  
692 (Morales et al., 2018)), but it remains unknown whether this also holds for error monitoring. We  
693 show that a subset of neurons signal errors in a domain general manner across the two tasks and  
694 all types of conflict. At the population level, these domain-general error neurons enabled  
695 domain-general readouts of self-monitored error across both tasks (**Fig. 7g**). Future work is  
696 needed to demonstrate whether this is also the case for metacognitive signals other than errors.

697

#### 698 **Domain-specific performance monitoring**

699

700 We found error neurons independently in both the Stroop task (as previously reported  
701 (Fu et al., 2019)) and the MSIT task (a new finding), with a subset of these neurons signaling error  
702 only in one or the other task. This would be expected given that what causes an error in the two  
703 tasks differs substantially: distraction by the prepotent tendency to read in the case of the Stroop  
704 task, and distraction by the tendency to respond to different keys (Simon) or distraction by the  
705 flanker number (Flanker) in the case of the MSIT. Importantly, these call for different  
706 compensatory mechanisms: for example, Stroop errors can be compensated for by suppressing  
707 attention to the word meaning, Simon errors by suppressing attention to the spatial location of  
708 the target, and Flanker errors by suppressing attention to the flanking distractors. The same  
709 argument applies to the conflict signal; together, these considerations highlight the fact that  
710 cognitive control requires information about performance specific to the task performed.  
711 Consistent with this requirement, the MFC neural states varied both along a generic conflict  
712 dimension that generalized across tasks as well as along all six types of specialized conflict  
713 dimensions. By changing connection weights, downstream neuronal processes can flexibly access  
714 performance monitoring signals at both extreme as well as intermediate levels of abstraction and  
715 drive behavioral adaptations accordingly. Prior work demonstrate the MFC's causal role in credit  
716 assignment within a single task by showing that macaque MFC neurons are involved in attributing  
717 the cause of an error to either low-level perceptual noise or exogenous changes in the response  
718 rule (high-level) (Sarafyazd and Jazayeri, 2019). We found that both at the level of single neuron  
719 and population activity, error and conflict signaling offered a robust readout of the task in which  
720 these performance disturbances were experienced, even when the subject had no prior task  
721 exposure. This task specificity at the population level is supported by the fact that some MFC  
722 neurons which did not signal errors or conflict in a previous task started to do so in a novel task  
723 with no prior training (**Fig. 7g-I** and **Fig. S7g-h**). These results are broadly consistent with the  
724 MFC's role in credit assignment within a task and demonstrate the remarkable flexibility of the  
725 MFC performance monitoring circuitry.

726

## 727 **Compositionality of conflict representation**

728

729 Further insight into how representations can be both general and specific is offered by  
730 examining the activity during “sf” conflict trials (both Simon and Flanker conflict) in the MSIT task.  
731 The potential compositionality of the representation of two kinds of conflict can be formulated  
732 as a generalization problem: if Simon and Flanker conflict are linearly additive, decoders trained  
733 to identify the presence of only Simon or Flanker conflict should generalize to the “novel”  
734 situation where both types of conflict are present. We found that this was the case, with the  
735 neural state approximately equal to the linear vector sum of the two neural states when the two  
736 types of conflict are present individually. This suggests that conflict representations are additive  
737 to a large extent (with the extent of deviation predicted by the degree of nonlinear mixing  
738 present). The (approximate) factorization of conflict representation is important for both  
739 domain-specific and domain-general adaptation: when different types of conflict occur  
740 simultaneously and the representation can be factorized, downstream processes responsible for  
741 resolving each type of conflict can all be initiated. On the other hand, domain-general processes  
742 can also read out the representation as a sum and initiate domain-general adaptations.

743

#### 744 **Estimating control demand enabled by ex-post conflict neurons**

745

746 We found that subjects’ performance in two conflict tasks was best explained by models  
747 that iteratively estimate how likely the next trial is to contain each possible type of conflict. These  
748 models integrate information across many trials and outperform the conflict adaptation model  
749 whose horizon only includes one trial back in terms of estimating and predicting control demand.  
750 We modelled the abstract decision process (which predicts RT and correct/incorrect, but not the  
751 actual choices) as a drift diffusion process with different drift rates on a conflict and non-conflict  
752 trial. Conflict prior was incorporated by adding a bias to the drift rates. The choice of DDM is  
753 informed by prior work demonstrating that sequential effects in perceptual decisions are  
754 modelled best with drift rate biases (rather than biases in other factors such as starting point or  
755 boundary) (Urai et al., 2019). We chose a Bayesian DDM framework because: 1) it estimates  
756 control demand (conflict probability) iteratively as our participants did and is thus neurally  
757 feasible; 2) similar models have found success in explaining behavior in cognitive control tasks

758 (Ide et al., 2013; Jiang et al., 2015); 3) it provides trial-by-trial regressors for neural analyses.  
759 Notably, this model performed significantly better than one assuming that subjects try to  
760 estimate a fixed conflict probability (which is how the task is designed). This shows that subjects  
761 were sensitive to the random variability in the trial congruency sequence to adjust their response  
762 strategy as reflected in their response times.

763  
764 A prediction of our Bayesian learning framework is that during the ex-post period,  
765 neurons would signal whether the just completed trial was a conflict or not. This is because this  
766 kind of “after the fact” conflict signal is needed to compute the posterior from the prior.  
767 Confirming this prediction, we found two kinds of conflict signals: one that occurred after action  
768 completion as predicted (“ex-post”), and one that occurred during action production (“ex-ante”)  
769 as expected (Botvinick et al., 2001; Sheth et al., 2012). Separate groups of neurons gave rise to  
770 these two types of conflict signals. To the best of our knowledge, this ex-post coding of conflict  
771 is a novel kind of conflict signal not previously documented. We posit that the ex-post conflict  
772 signal is an outcome signal (Shenhav et al., 2013) that is used for updating slowly varying  
773 representations of estimated conflict probability. Interestingly, there is significant overlap  
774 between error neurons and these ex-post conflict neurons. Confirming this, we found that a  
775 common coding axis exists that supports decoding of both error and conflict, though the  
776 decoding accuracy is significantly lower for conflict than for error (**Fig. S6a-b**). These results  
777 suggest the origins of ex-post conflict and error signals may be similar: a putative prediction error  
778 computed based on an efference copy (Lo and Wang, 2006). Future work is needed to test this  
779 new hypothesis. We also revealed a direct neural correlate of the updating step: firing rate  
780 changes of prior neurons during the ex-post period are positively correlated with prior-posterior  
781 differences in the model. Altogether, the neuronal responses we found fit remarkably well to the  
782 parameters of a Bayesian model that used trial-wise updating to estimate upcoming conflict – a  
783 critical ingredient in the control of flexible behavior in changing environments.

784

785 **Prior neurons as a substrate for proactive control**

786

787           The dual mechanisms of control (DMC) framework (Braver, 2012) distinguishes between  
788 proactive and reactive control and suggests that proactive control involves sustained anticipatory  
789 activity. We posit that the prior-signaling neurons reported in this study can inform proactive  
790 control processes about the estimated demand for control in the upcoming trial. Compatible with  
791 this view, responses of these prior/posterior neurons in the MFC were sustained and stable  
792 across time. At the population level, the prior/posterior representations were parametric with  
793 dynamics indicative of a line attractor, from which neural activity departs and then returns to  
794 when completing a trial. The distance in neural state space between neural trajectories remained  
795 stable across the trial, as expected from a signal that only varies slowly and that reflects a learning  
796 process that occurs over multiple trials.

797  
798           A likely contribution to the temporal stability of prior coding are the biophysical  
799 properties of prior neurons, which differed from other neurons in two ways. First, these neurons  
800 exhibited long-range autocorrelations in their baseline spike counts. While spike-count  
801 autocorrelations in the range of seconds are known to differ between brain regions (Bernacchia  
802 et al., 2011) and between neurons with different tuning (Cavanagh et al., 2016, 2018), here we  
803 examined long-range temporal correlation on a substantially longer timescale (minutes) by  
804 assessing the self-similarity of trial-by-trial spike counts during the baseline using Detrended  
805 Fluctuation Analysis (DFA) (Hardstone et al., 2012). Our finding that DFA values for prior-encoding  
806 neurons are high (indicating long-range temporal autocorrelations) suggests that they are ideal  
807 substrates for representing a slowly varying internal state. In addition, these neurons tended to  
808 have shorter extracellular waveforms. While this relationship is complex (Vigneswaran et al.,  
809 2011), neurons with narrower spikes are more likely to be interneurons and the functional role  
810 of thin- and broad- spike MFC neurons is often different (Bean, 2007; Sajad et al., 2019). Notably,  
811 in macaques, thinner-spike neurons are more likely to have long autocorrelations making them  
812 ideal to carry slowly changing information across trials (Kawai et al., 2019). Our findings tie  
813 together the biophysical properties of single neurons with their tuning, indicating that conflict  
814 prior neurons are ideally suited to carry slowly changing information across trials.

815

816

817 **Acknowledgments:** We thank the members of the Adolphs and Rutishauser labs and Lawrence  
 818 J. Jin for discussion. We thank all subjects and their families for their participation and the staff  
 819 of the Cedars-Sinai Epilepsy Monitoring Unit for their support.

820  
 821 **Funding:** This work was supported by NIMH (R01MH110831 to U.R.), the NIMH Conte Center  
 822 (P50MH094258 to R.A. and U.R.), the National Science Foundation (CAREER Award BCS-1554105),  
 823 the BRAIN initiative through the NIH Office of the Director (U01NS117839), and the Simons  
 824 Foundation Collaboration on the Global Brain (RA, ZF).

825

## 826 Figures

827

### 828 Figure 1. Tasks, model, and behavioral results.

829

Figure 1

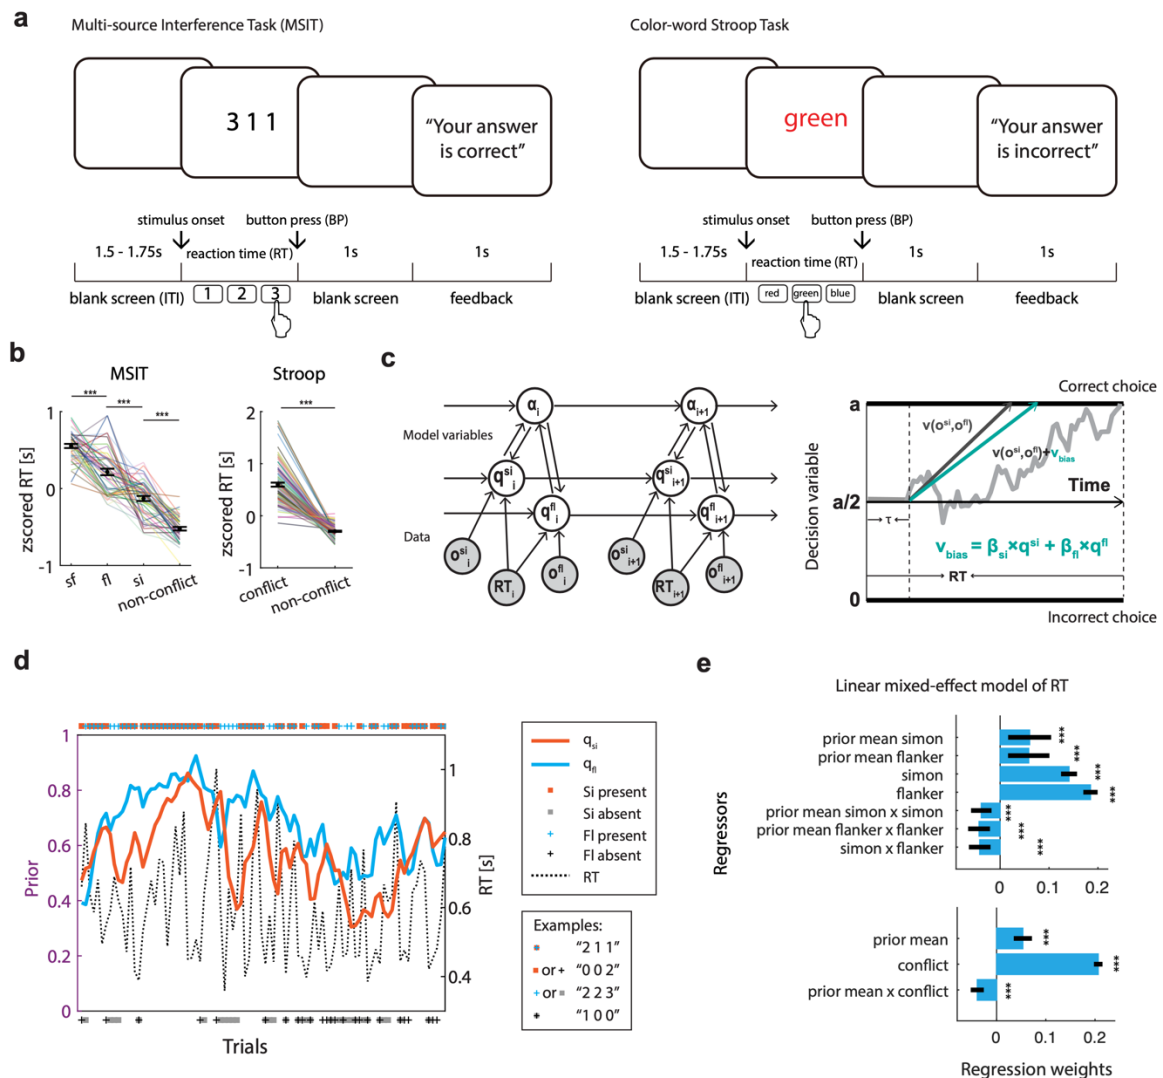

830

831 (a) Tasks. MSIT (left) and Stroop (right). Participants indicated the identity (1,2, or 3) of the unique  
832 number in MSIT, and the ink color of a colored word in Stroop. Feedback followed 1s after  
833 responses and indicated trial outcome.  
834 (b) RTs were significantly prolonged by conflict in MSIT (left) and Stroop (right), showing the  
835 Simon, Flanker and Stroop effects. Each line is a session (N = 41 and 82, respectively).  
836 (c) Graphical representation of the updating process (left) and the decision process modelled as  
837 a drift diffusion process (right). Incorporating RT likelihood function (DDM) allows the tuning of  
838 model estimate for conflict probability. Shown is the MSIT model, which has the five variables  
839 volatility ( $\alpha$ ), predicted Simon conflict ( $q_{si}$ ), predicted Flanker conflict ( $q_{fl}$ ), observed Simon  
840 conflict ( $o_{si}$ ), observed Flanker conflict ( $o_{fl}$ ), and RT. Observables (conflict type, RT, and outcome)  
841 are shown in gray, internal variables in white. Arrows indicate information flow. As the trial  
842 started, the volatility variable is updated first, and then both predicted conflicts are updated by  
843 the respective observed conflicts (Bernoulli likelihood) and RT (DDM likelihood). A linear  
844 combination of the Simon conflict and Flanker conflict priors on each trial are entered as a drift  
845 rate bias. The hyperparameters for RT tuning included the two linear coefficients before conflict  
846 priors ( $\beta_{si}$ ,  $\beta_{fl}$ ), boundary separation ( $a$ ) and the four separate drift rates for the four conflict  
847 conditions (si only, fl only, si+fl, no-conflict). The conflict priors and posteriors were used as  
848 regressors for subsequent behavioral and neural analyses.  
849 (d) Estimated mean of the prior for Simon probability (orange) and Flanker probability (blue) from  
850 an example MSIT session. Markers placed on the top indicated that either Simon conflict (orange  
851 square) or Flanker conflict (blue cross), or both, was *present* on a trial. As is shown here, the  
852 priors increase when there is a run of conflict (left part of the graph, both blue and orange traces  
853 go up).  
854 (e) Regression analyses of RT using linear mixed-effect models. Blue bars show regression  
855 coefficients; black bars show confidence interval. All regressors explained significant variance as  
856 determined by the likelihood ratio test (see **Methods**). Conflict prior positively predicted RT in  
857 MSIT and Stroop.  
858 \* $p < 0.05$ , \*\*  $p < 0.01$ , \*\*\*  $p < 0.001$ , n.s., not significant ( $p > 0.05$ ).  
859

860 **Figure 2. Example neurons in Stroop (left) and MSIT (right).**

Figure 2

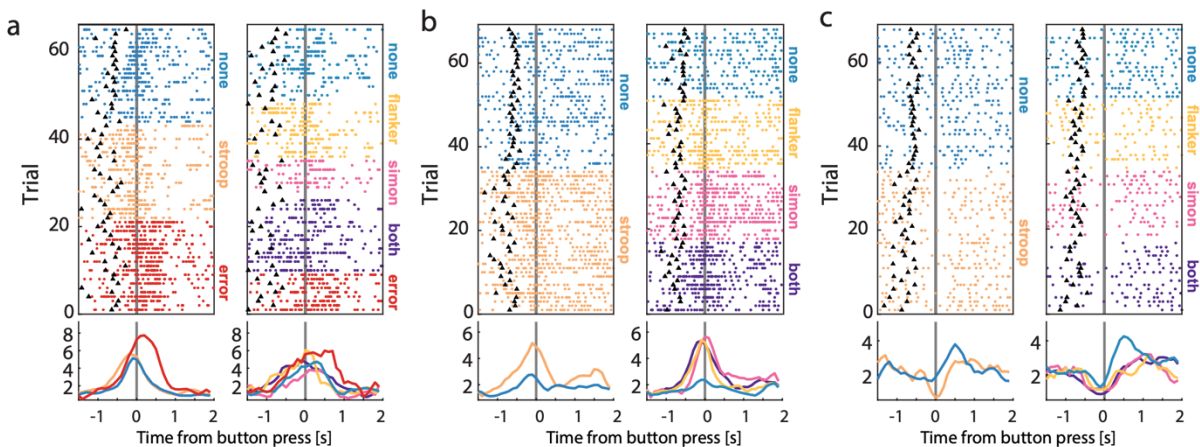

862

863 Shown here are raster plots and peri-stimulus time histograms for three example neurons in both  
 864 tasks. Left panel shows data from Stroop, right show data from MSIT. Data are aligned to button  
 865 presses ( $t=0$ ). The black triangles mark stimulus onset.

866 (a) Neuron signaling action errors.

867 (b) Neuron signaling conflict by firing rate increase around button presses.

868 (c) Neuron signaling conflict by a firing rate decrease around button presses.

869 Trial types are marked by colored words on the right side of the box. These example neurons  
 870 show similar responses dynamics in both tasks. Trials were re-sorted into groups for display  
 871 purposes only.

872

873 **Figure 3. Neuronal selection and ERP analysis.**

874

Figure 3

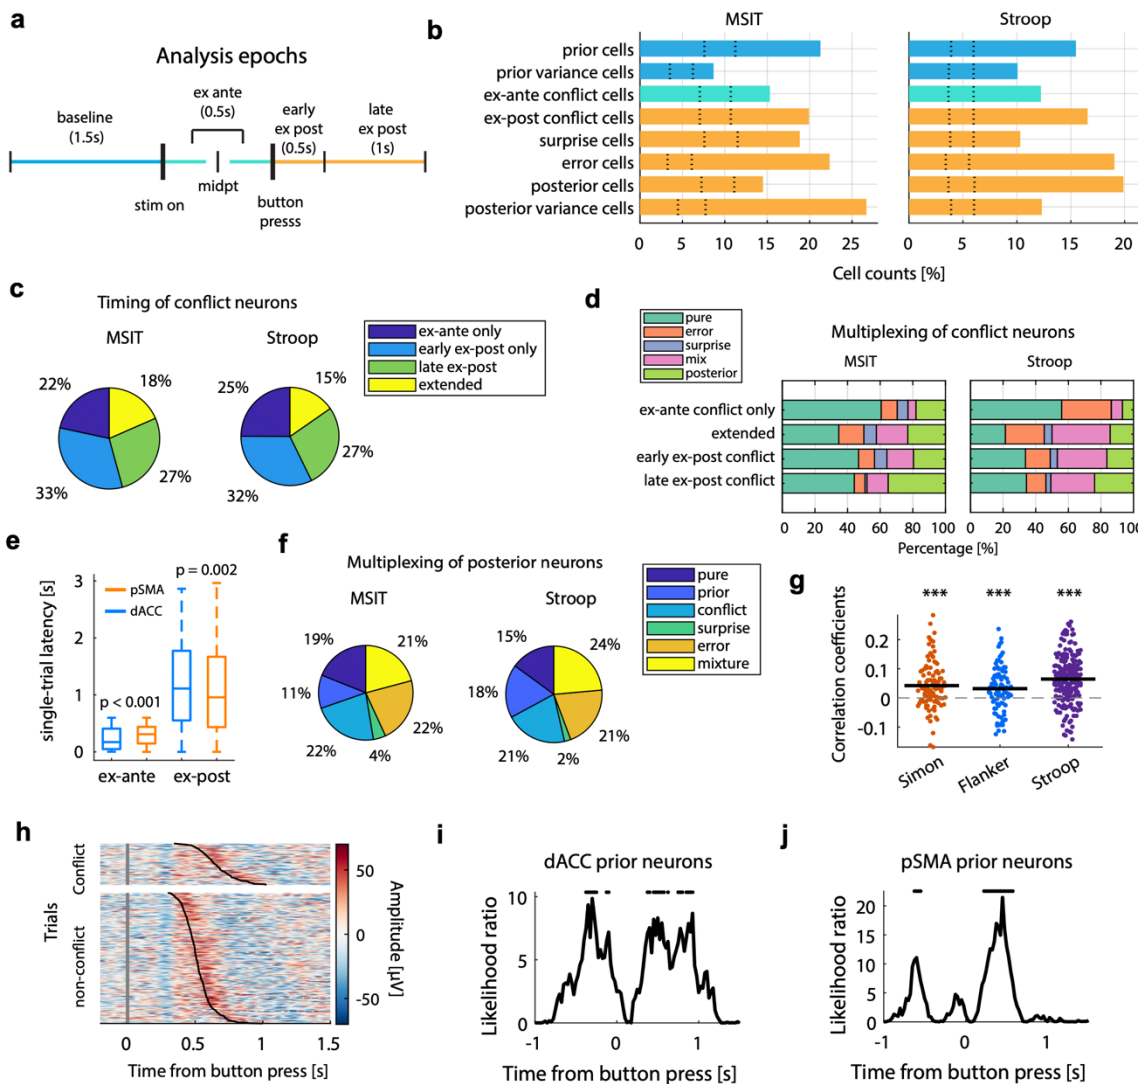

875

876



877 (a) Analyses epochs used in neural analyses. The ex-ante epoch is defined as 0.5s epoch centered  
878 at the midpoint between 100ms after stimulus onset and button presses. This was the moment  
879 when conflict should achieve its maximum. Ex-post epochs are defined as epochs following  
880 button presses. Epochs are colored by blue (baseline), cyan (ex-ante) and orange (ex-post). The  
881 thickened vertical bars represent actual physical events, the slim vertical bars demarcate epochs.  
882 Note that we also sometimes use 1s after button press as an analysis window.  
883 (b) Percentage of neurons that encode task variables in MSIT (left) and Stroop (right). The color  
884 code represents the epochs used to select these neurons (see (a)). Rows are arranged from top  
885 to bottom in temporal order. Dotted lines represent 2.5<sup>th</sup> and 97.5<sup>th</sup> percentiles of the null  
886 distribution obtained from permutation. For all groups shown,  $p < 0.001$ .  
887 (c) Percentage of conflict neurons that are active exclusively in four groups: ex-ante, early ex-  
888 post, late ex-post, and throughout ex-ante and ex-post epochs.  
889 (d) Percentage of conflict neurons that were also selective for error, surprise, posterior, or any  
890 combination of these factors (“mix”). Substantial proportions of conflict neurons multiplex error  
891 and posterior information. The intersection between conflict and posterior increases towards the  
892 later part of the trial. Rows are arranged from top to bottom in temporal order.  
893 (e) Comparison of single-trial neuronal response latency of conflict neurons in dACC and pre-SMA.  
894 Ex-ante conflict neurons become active earlier in dACC than in pre-SMA, whereas ex-post conflict  
895 neurons become active earlier in pre-SMA than in dACC. Only correct conflict trials are used in  
896 this analysis.  
897 (f) Percentage of posterior neurons that intersect with prior, conflict, surprise and error signaling.  
898 We hypothesize that the extensive overlap between these groups reflects posterior computation.  
899 (g) Neuronal signature of updating conflict prior based on the posterior. Correlation is computed  
900 between the difference between prior and posterior (behavioral update) and the difference  
901 between demeaned  $FR_{\text{ex-post}}$  and  $FR_{\text{baseline}}$  (neural update) for all prior neurons. On average, the  
902 correlation is significantly positive, suggesting that the change in firing rates is commensurate  
903 with the extent of updating derived from the behavioral model.  
904 (h) An example session of intracranial EEG in Stroop, aligned to stimulus onset (grey vertical bars)  
905 and sorted by RT (black lines). Color code represents amplitude in micro volt. An event-related  
906 potential, named correct-trial potential (CRP), occurs shortly after button presses that is present  
907 on both conflict and non-conflict trials.  
908 (i) Relation between CRP amplitude and spiking activity of prior neurons. Both data were  
909 simultaneously recorded in dACC. Likelihood ratio computed by comparing the full Poisson  
910 regression model with CRP as a fixed effect with a reduced model without the CRP term, and is  
911 plotted as a function of time. Black dots on top mark significant time bins, corrected for multiple  
912 comparisons using the false discovery rate (FDR) method.  
913 (j) Same as in (i), but for pre-SMA data.

914  
915 **Figure 4. Long-range temporal correlation autocorrelation of spiking of prior neurons.**

916

Figure 4

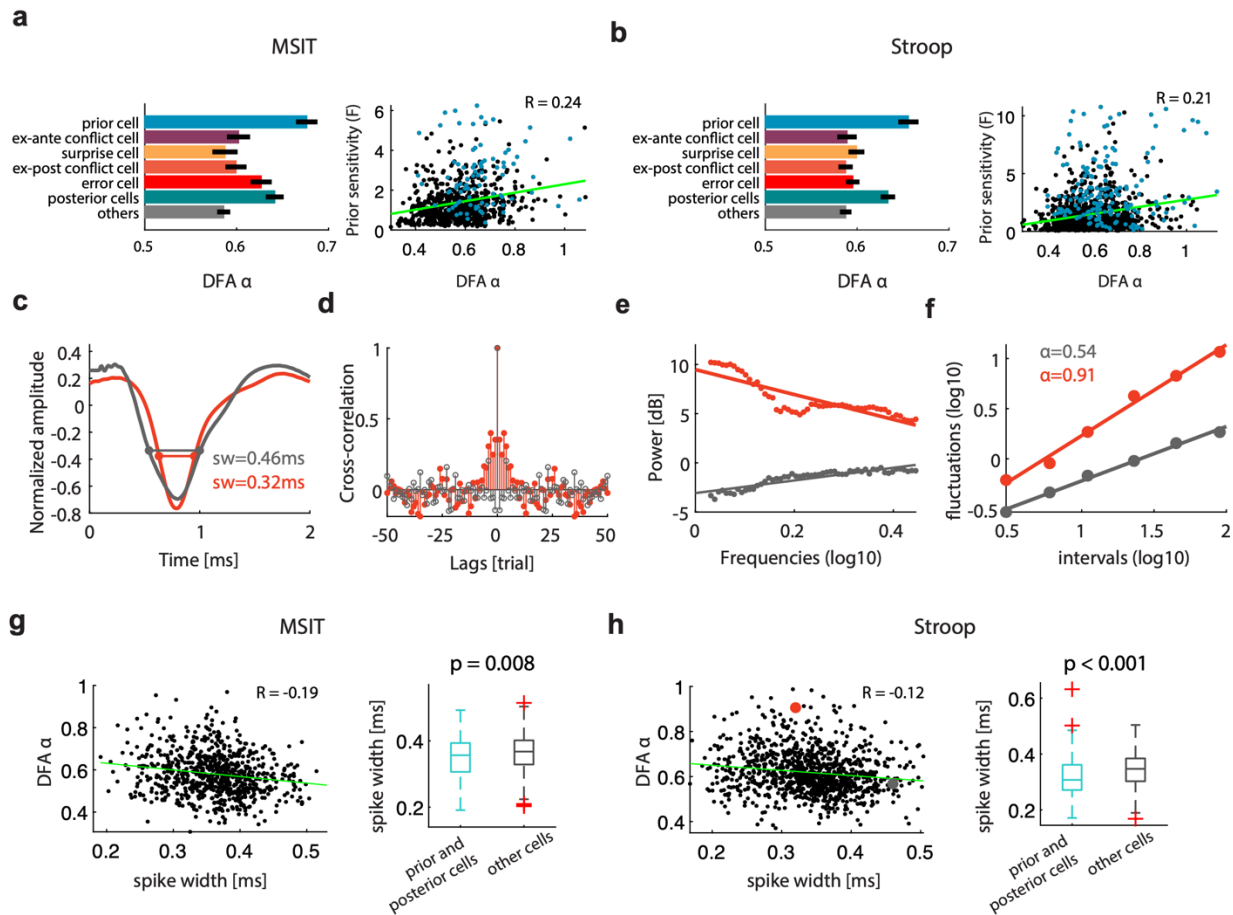

917  
 918 (a) Mean baseline DFA  $\alpha$  value for different groups of neurons (left), and correlation between  
 919 baseline DFA  $\alpha$  value and the coding strength of prior, which is assessed by the F statistic  
 920 computed from regressing prior against baseline spike counts (right) for MSIT. Separate data  
 921 were used to compute  $\alpha$  value and prior coding strength to avoid selection bias. Prior neurons  
 922 have significant larger baseline DFA  $\alpha$  value than any other groups ( $p < 0.001$ , ANOVA). The  
 923 coding strength of prior was correlated strongly with the baseline  $\alpha$  value ( $r = 0.24$ ,  $p < 0.001$ ).  
 924 (b) same as in (a) but computed for the Stroop task.  
 925 (c-f) Two example neurons, showing (c) waveforms, (d) autocorrelation, (e), power spectrum,  
 926 and (f) fluctuations as a function of time intervals used to compute DFA  $\alpha$  value (slope). The  
 927 neuron with narrower spike width has higher DFA  $\alpha$  value ( $r = -0.19$ ,  $p < 0.001$ ).  
 928 (g) DFA  $\alpha$  value is negatively correlated with spike width for MFC neurons (left) in MSIT. Prior and  
 929 posterior neurons as a group have significantly narrower spikes than other neurons (right).  
 930 (h) same as in (g) but for the Stroop task.  
 931

931

932 **Figure 5. Temporal dynamics and cross-time generalization.**

Figure 5

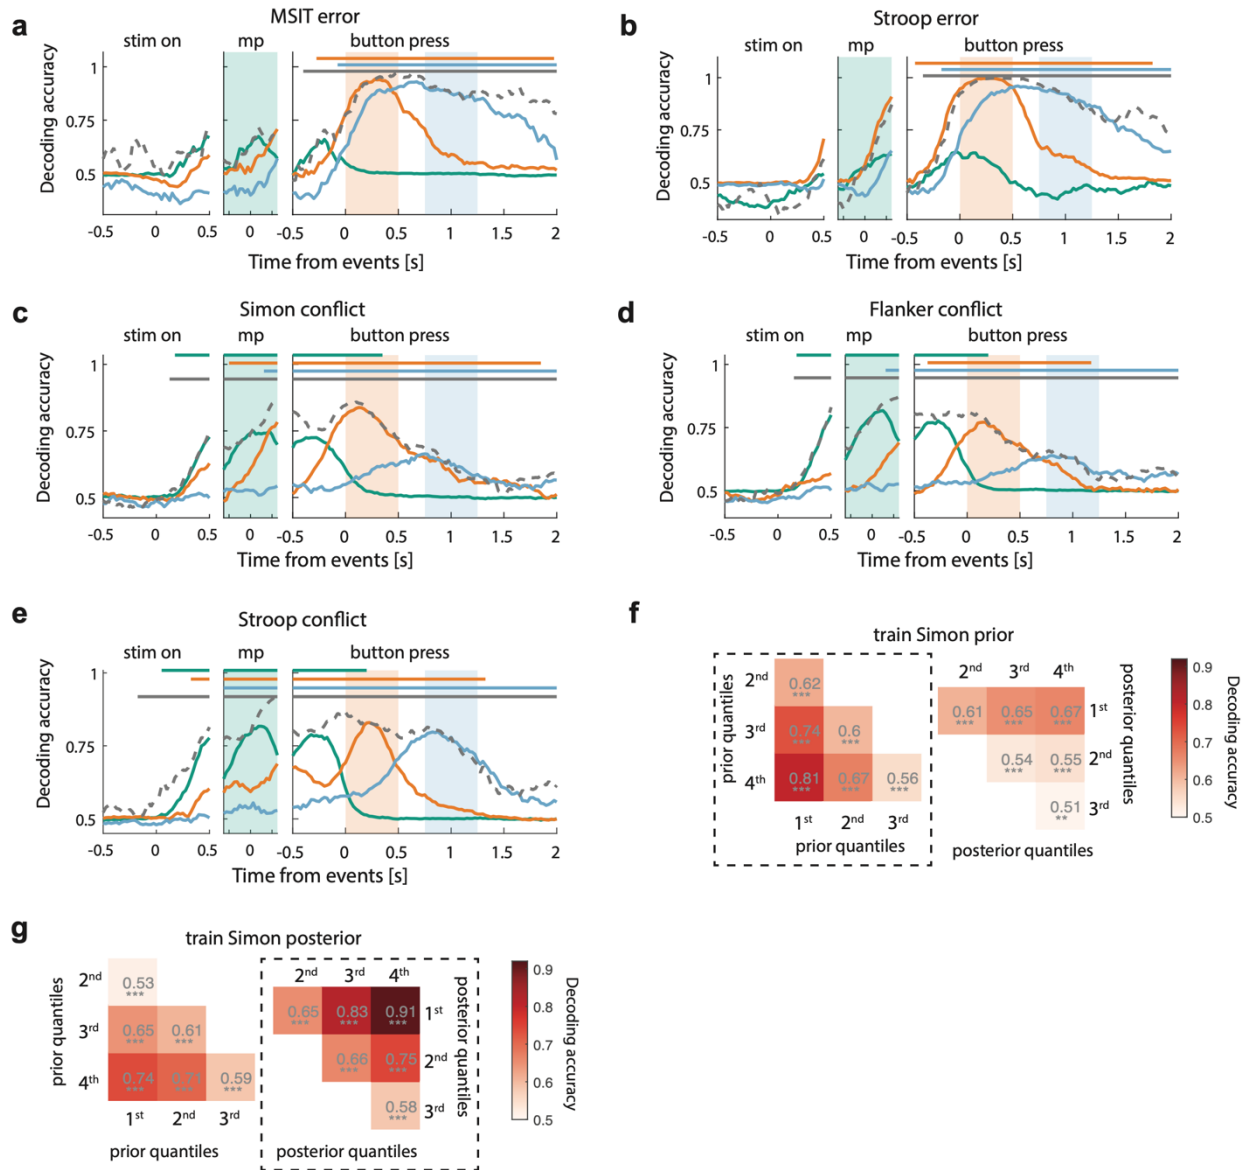

933  
 934 (a-e) Decoding accuracy as a function of time for Stroop error, MSIT error, Simon conflict, Flanker  
 935 conflict and Stroop conflict. The three panels show data aligned to stimulus onset, midpoint  
 936 between 100ms after stimulus onset and button presses, button press onset. Dotted gray trace  
 937 represents within-time decoding accuracy, i.e., the data from the same epoch were used to train  
 938 and test a decoder. Green, blue and orange traces represent decoding accuracy of decoders  
 939 trained with data from the epochs demarcated by shading with the same colors, which is a test  
 940 of the temporal generalization of these decoders. Horizontal bars demarcate the extent of  
 941 significant clusters in time as determined by the cluster-based permutation test ( $p < 0.5$ ).

942 (f-g) Decoding accuracy for classifying between pairs of Simon prior or posterior levels (binned  
 943 by quartiles). Color bars show decoding accuracy. Dotted frames mark the within-time decoding  
 944 results. Decoders that classify prior quartiles are trained using baseline spike counts (1.5s before

945 stimulus onset), whereas decoders that classify posterior quartiles are trained using ex-post spike  
 946 counts (2s after button press). To test temporal generalization of these decoders, prior-trained  
 947 decoders are tested with posterior data and labels, and vice versa. Dashed boxes represent  
 948 within-time decoding.

949

950 **Figure 6. State-space representation of conflicts, prior, and posterior.**

951

Figure 6

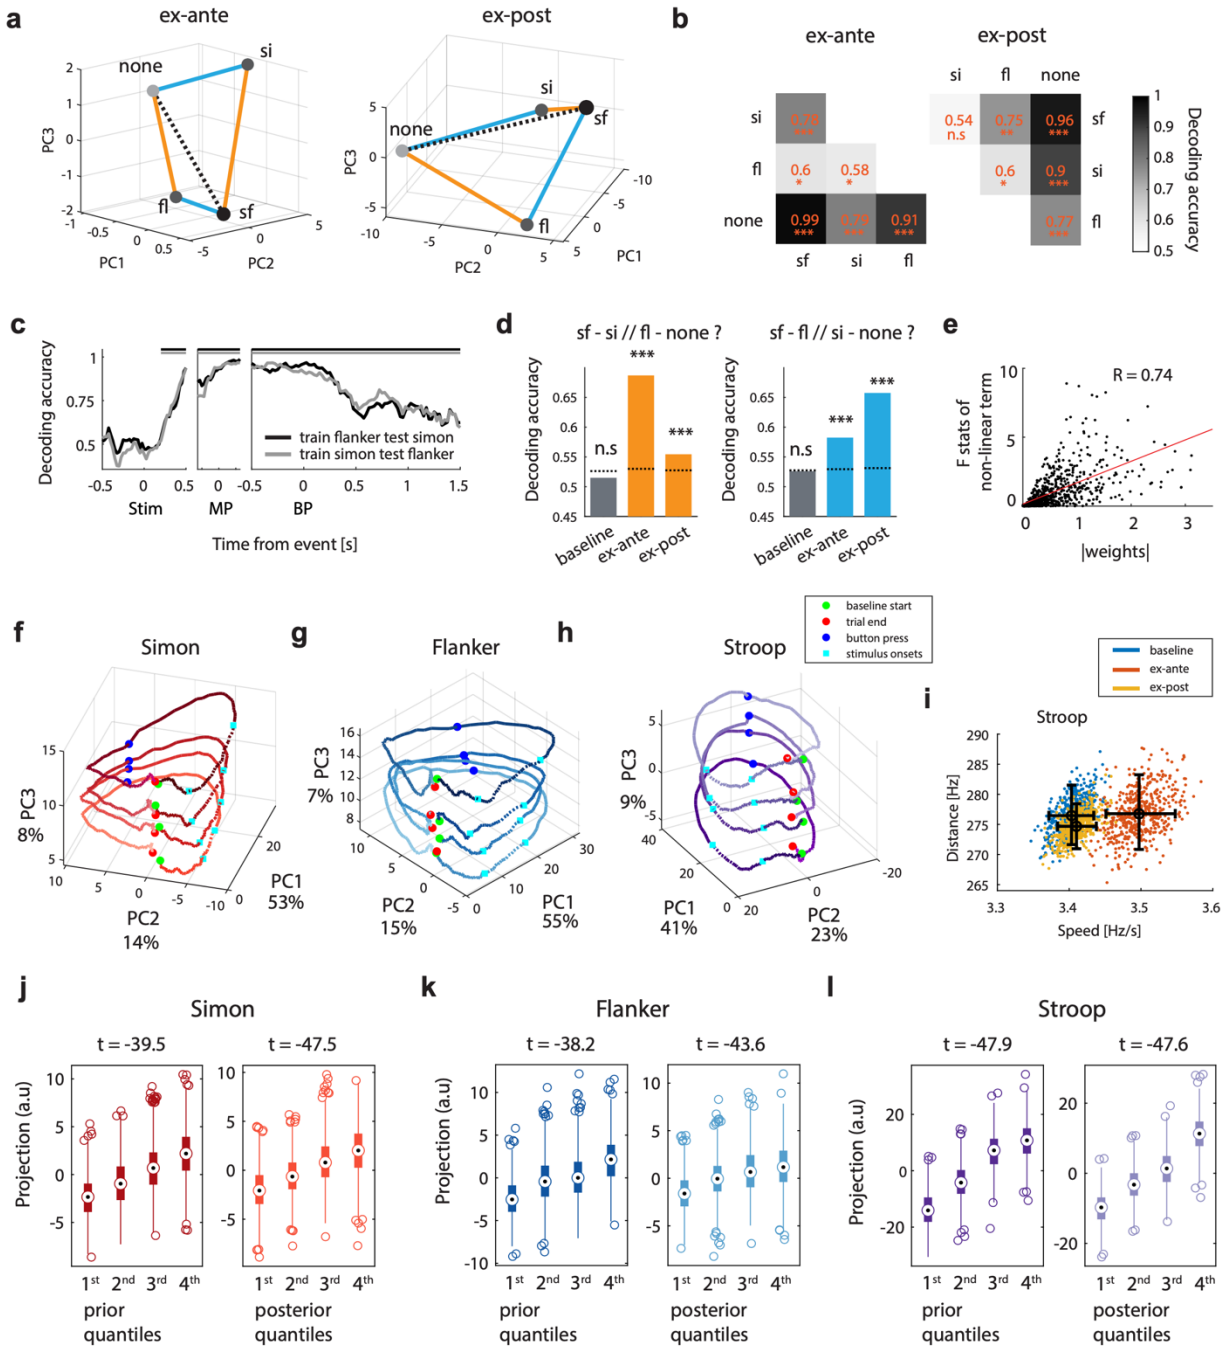

952

953 (a) Visualization of the conflict population representation in MSIT. Trial mean of four MSIT  
954 conflict conditions, Simon only (“si”), Flanker only (“fl”), Simon and Flanker both present (“sf”),  
955 and non-conflict (“none”), plotted in space spanned by three principal components. Left panel  
956 uses ex-ante data. Right panel uses ex-post data. The extent of compositionality of conflict  
957 representation is tested by condition generalization of decoding in (d). Dotted line is the vector  
958 used to classify pairs of conflict conditions in (b).

959 (b) Decoding accuracy of pairwise classification of conflict conditions. Training data and left-out  
960 testing data from the four conflict conditions are projected to the population vector flanked by  
961 averages of non-conflict trials and sf trials, shown as the dotted line in (a). Color code represents  
962 decoding accuracy. This coding dimension separates the four conflict conditions well.

963 (c) Abstract conflict signal. The three panels show decoding accuracy using data aligned to  
964 stimulus onset, midpoint between 100ms after stimulus onset and button press onset, and  
965 button press onset. For each time point, a decoder is trained with Simon (union of si and sf) vs.  
966 non-Simon (union of fl and none) trials or Flanker (union of fl and sf) vs non-Flanker (union of si  
967 and none) trials and used to classify left-out data of Flanker vs non-Flanker trials (grey) or Simon  
968 vs. non-Simon trials (black).

969 (d) Testing compositionality of conflict representation with condition generalization of decoding.  
970 If compositional, the sum of the representations of fl and si (vectors none  $\rightarrow$  fl, none  $\rightarrow$  si)  
971 be equal to the representation of sf (none  $\rightarrow$  sf), and the four condition means should form a  
972 parallelogram. We tested the condition generalization using raw spike count data from the ex-  
973 ante and ex-post (1s after button presses) epochs and from the baseline as a control without  
974 dimensionality reduction. Data from the means connected by one of the blue edges in (a) were  
975 used to train a decoder, which was then tested with left-out data from the means connected by  
976 the opposite blue edge, and vice versa. Blue bars show decoding accuracy (baseline 0.51, ex-ante  
977 0.69, ex-post 0.55). Same was also tested with data connected by the orange edges. Orange bars  
978 show decoding accuracy (baseline 0.53, ex-ante 0.58, ex-post 0.66). Both the blue and orange  
979 pairs of opposing edges supported such generalization simultaneously as indicated by the above-  
980 chance decoding accuracy ( $p < 0.001$ ), demonstrating parallelism and thus the compositionality  
981 of conflict representation. Dotted lines show 97.5<sup>th</sup> percentile of the null distribution from  
982 permutation.

983 (e) Single neuron with nonlinear coding of Simon and Flanker conflict contribute to deviation of  
984 conflict representation from perfect linearity. Data used here are from the ex-post epoch.  
985 Nonlinear coding of conflict by a single neuron is measured by the F statistic of the interaction  
986 term between Simon and Flanker conflict in an ANOVA model with spike counts as the dependent  
987 variable. Each neuron’s contribution to the deviation from linear additivity in the high  
988 dimensional neural space is quantified by the weight of the difference vector between “sf” and  
989 “si + fl”. Scatter plot shows the relation between these two measures. Red line shows the linear  
990 fit.

991 (f-h) Visualization of prior/posterior population representation in MSIT and Stroop. Green dots  
992 mark the onset of trial baseline, cyan squares mark the range of possible stimulus onsets, blue  
993 dots mark button press and red dots mark end of trial. The range of stimulus onsets (a range  
994 because trials are aligned to button press onsets) is shown as broken lines for each prior level.  
995 For the portion before button presses (blue dots), the four trajectories correspond to the mean  
996 of trials grouped by quartiles of prior. For the portion after button presses, the four trajectories

997 correspond to the mean of trials grouped by quartiles of posterior for after button presses. Trials  
 998 are aligned to button press onset. The color of trajectories fades as the trial progresses towards  
 999 the end (dark and light colors correspond to start and end of the trial). Most of the variance  
 1000 related to prior/posterior is captured by PC3, which is orthogonal to most of the time-dependent  
 1001 dynamics.

1002 (i) Distance between trajectories and average speed computed from trials grouped by quartiles  
 1003 of Simon conflict prior in the baseline (blue) and the ex-ante (orange) epoch, and trials grouped  
 1004 by Simon conflict posterior in the ex-post epoch (yellow). Trajectories are visualized in Figure 6f.  
 1005 The state space speed stays low during baseline, increases significantly during the ex-ante epoch  
 1006 and decreases back to a value similar to that during the baseline. Distance between trajectories  
 1007 is stable across time.

1008 (j-l) Projection values on the coding dimension of Simon (J,  $p < 0.001$  for both prior/posterior,  
 1009 prior  $t(11996) = -39.5$ , posterior  $t(11996) = -47.5$ ), Flanker (K,  $p < 0.001$  for both prior/posterior,  
 1010 prior  $t(11996) = -38.2$ , posterior  $t(11996) = -43.6$ ) or Stroop (L,  $p < 0.001$  for both prior/posterior,  
 1011 prior  $t(11996) = -47.9$ , posterior  $t(11996) = -47.6$ ) prior or posterior (PC3 in f-h). The order of  
 1012 projection values is on average consistent with the order of the prior/posterior quartiles, even  
 1013 though PCA does not have access to the order information.

1014

1015

**Figure 7. Domain-general representation of performance monitoring signals.**

Figure 7

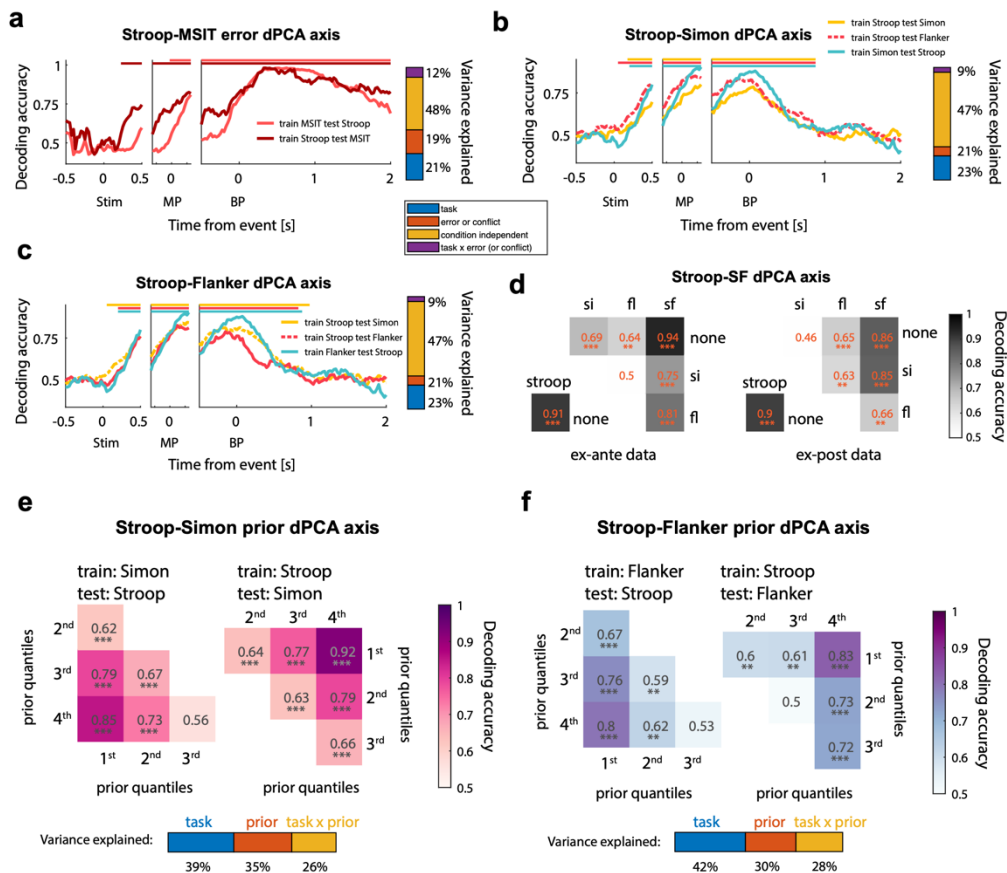

1016

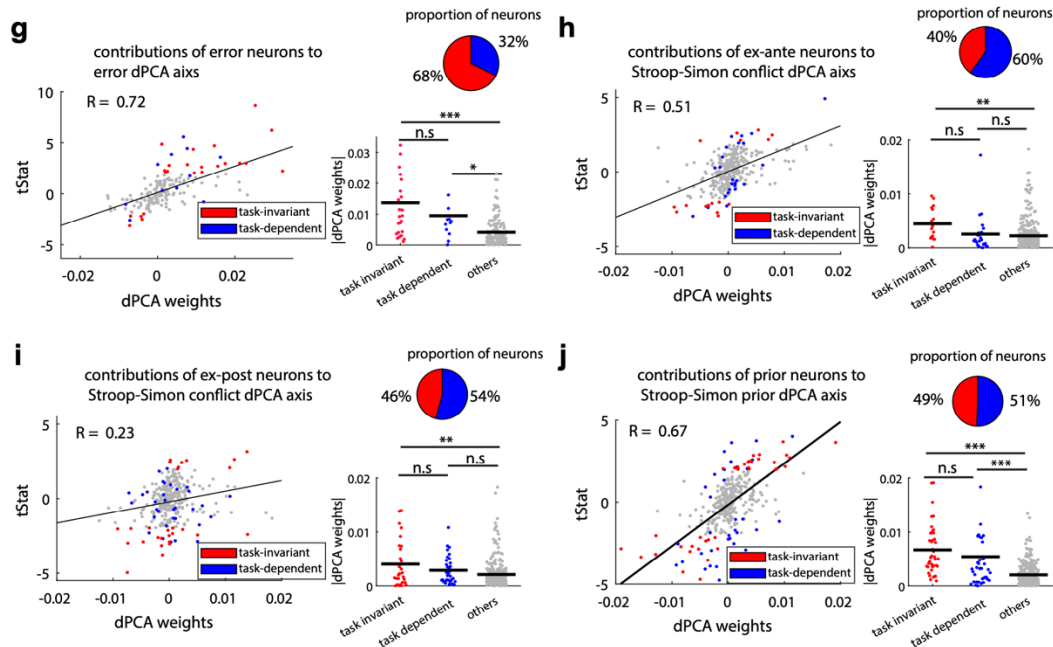

1017

1018

1019

1020

1021

1022

1023

1024

1025

1026

1027

1028

1029

1030

1031

1032

1033

1034

1035

1036

1037

1038

1039

1040

1041

1042

1043

(a) Task-invariant decoding of errors in both MSIT (salmon) and Stroop (crimson). The task-invariant coding dimension is extracted using dPCA that marginalizes out task information and time. This dPCA coding dimension is extracted from the error contrast in Stroop (error conflict vs. correct conflict trials) and the error contrast in MSIT (error “sf” trials and correct “sf” trials). This controls for trial conflict and isolates effects related only to error. Left, Accuracy for decoding errors as a function of time. Bar on the right shows the variance explained by the different dPCA components (color code see figure legend). The angle between the error dPC and the task dPC derived from dPCA is  $94.47^\circ$  and did not differ significantly from orthogonality ( $p = 0.53$ ,  $\tau = -0.032$ , Kendall rank correlation).

(b-c) Task-invariant decoding of conflict in both MSIT (Simon, yellow; Flanker red) and Stroop (green). Because MSIT has two conflict conditions, Simon and Flanker, task invariance was investigated between Stroop/Simon and between Stroop/Flanker conflicts separately. This dPCA coding dimension is extracted from conflict and non-conflict trials in Stroop and either from Simon and non-Simon trials (b) or from Flanker and non-Flanker trials (c), by marginalizing out task and time. The angle between the Stroop-Simon conflict dPC and the task dPC is  $81.13^\circ$  and did not differ significantly from orthogonality ( $p = 0.19$ ,  $\tau = 0.048$ , Kendall rank correlation). The angle between the Stroop-Flanker conflict dPC and the task dPC is  $81.13^\circ$  and is significantly but weakly non-orthogonal ( $p = 0.018$ ,  $\tau = 0.087$ , Kendall rank correlation). Left-out conflict trials and non-conflict trials in Stroop, and left-out Simon, non-Simon, Flanker, non-Flanker trials in MSIT are projected and classified by this coding dimension. Left, decoding accuracy of conflict as a function of time. The bar on the right represents variance explained by the different dPCA components (color code see figure legend).

(d) Testing separability of conflict conditions in Stroop and MSIT using data from the ex-ante (left) and ex-post epochs (right). The dPCA coding dimension used in this analysis is extracted by using conflict and non-conflict trials in Stroop and sf and non-conflict trials in MSIT by marginalizing out task information. Because data from ROIs are used, the time dimension is already marginalized

1044 out before entering dPCA algorithm. This coding dimension support classification of 83% of pairs  
1045 of MSIT conflict conditions (upper triangle matrices) as well as Stroop conflict (left corner). Color  
1046 coding represents decoding accuracy, orange numbers indicate the numerical values of decoding  
1047 accuracy of that pair of conflict conditions (e.g., the accuracy is 0.69 for decoding si vs. none).  
1048 Conflict monitoring is thus task-invariant but still preserves maximal separability of task-specific  
1049 conflict conditions (MSIT).

1050 (e) Task-invariant decoding of all pairs of conflict prior levels in Stroop (lower triangle matrix) and  
1051 Simon (upper triangle matrix). The dPCA coding dimension here is extracted by using the Stroop  
1052 conflict prior contrast (the 1<sup>st</sup> vs. 4<sup>th</sup> quartiles of Stroop conflict prior) and the Simon conflict prior  
1053 contrast (the 1<sup>st</sup> vs. 4<sup>th</sup> quartiles of Simon conflict prior), marginalizing out task information. Color  
1054 code represents decoding accuracy. Bar at the bottom shows variance explained of dPCA  
1055 components (for decoding, the component labelled as “prior” is used). The angle between  
1056 Stroop-Simon conflict prior dPC and the task dPC is 106.42° and did not differ significantly from  
1057 orthogonality ( $p = 0.78$ ,  $\tau = -0.01$ , Kendall rank correlation). The angle between Stroop-Flanker  
1058 conflict prior dPC and the task dPC is 74.42° and did not differ significantly from orthogonality ( $p$   
1059  $= 0.30$ ,  $\tau = -0.038$ , Kendall rank correlation).

1060 (f) Same as in (e) but for Flanker prior.

1061 (g-j) Contribution of single neuron coding of error (g), Stroop-Simon ex-ante conflict (h), Stroop-  
1062 Simon ex-post conflict (i) and Stroop-Simon prior (j) to the task-invariant population coding of  
1063 these variables. Because MSIT has two conflict conditions, Simon and Flanker, task invariance  
1064 was tested between Stroop and Simon or between Stroop and Flanker separately. We modelled  
1065 each neuron’s baseline (j), ex-ante (h) or ex-post (g, i) response using ANOVA. The main effects  
1066 are a dummy variable indicating error (g) or Stroop-Simon conflict (h, i) or Stroop-Simon prior (j)  
1067 and task ID (Stroop or MSIT), and the interaction term between these two. A significant  
1068 interaction suggests that the coding is more prominent in one task than the other. Task-invariant  
1069 neurons is defined as having a significant main effect of the variable of interest but an  
1070 insignificant interaction with the task ID. Task-dependent neurons is defined as having a  
1071 significant interaction term.

1072 (g) Contribution of single neuron ex-post coding of error to task-invariant population coding of  
1073 error. Of the 37 of neurons that were selected as signaling error in the ex-post epoch in either  
1074 task, 68% did so in a task-invariant way (red) and 32% in a task-dependent (blue) way (pie chart).  
1075 There is a strong correlation between the error t-statistic and the dPCA weight of a particular  
1076 neuron (scatter plot on the left;  $R = 0.72$ ). Comparing the mean absolute value of dPCA weights  
1077 between task-invariant, task-dependent and uncategorized neurons, both the task-invariant ( $p <$   
1078  $0.01$ ) and task-dependent ( $p < 0.05$ ) neurons had significantly larger absolute weights than the  
1079 uncategorized neurons.

1080 (h) Contribution of single neuron ex-ante coding of Stroop-Simon conflict to task-invariant  
1081 population coding of Stroop-Simon conflict. Of the 40 of neurons that were selected as signaling  
1082 conflict in the ex-ante epoch in either task, 40% did so in a task-invariant way (red) and 60% in a  
1083 task-dependent (blue) way (pie chart). There is a strong correlation between the error t-statistic  
1084 and the dPCA weight of a particular neuron (scatter plot on the left;  $R = 0.51$ ). Comparing the  
1085 mean absolute value of dPCA weights between task-invariant, task-dependent and uncategorized  
1086 neurons, only the task-invariant neurons had significantly larger absolute weights than the  
1087 uncategorized neurons ( $p < 0.01$ ).



1088 (i) Contribution of single neuron ex-post coding of Stroop-Simon conflict to task-invariant  
 1089 population coding of Stroop-Simon conflict. Of the 46 of neurons that were selected as signaling  
 1090 conflict in the ex-post epoch, 46% did so in a task-invariant way (red) and 54% in a task-  
 1091 dependent (blue) way (pie chart). There is a strong correlation between the error t-statistic and  
 1092 the dPCA weight of a particular neuron (scatter plot on the left;  $R = 0.51$ ). Comparing the mean  
 1093 absolute value of dPCA weights between task-invariant, task-dependent and uncategorized  
 1094 neurons, only the task-invariant neurons had significantly larger absolute weights than the  
 1095 uncategorized neurons ( $p < 0.01$ ).

1096 (j) Contribution of single neuron baseline coding of Stroop-Simon conflict prior to task-invariant  
 1097 population coding of Stroop-Simon conflict prior. Of the 75 of neurons that were selected as  
 1098 signaling prior in the baseline in either task, 49% did so in a task-invariant way (red) and 51% in  
 1099 a task-dependent (blue) way (pie chart). There is a strong correlation between the error t-statistic  
 1100 and the dPCA weight of a particular neuron (scatter plot on the left;  $R = 0.51$ ). Comparing the  
 1101 mean absolute value of dPCA weights between task-invariant, task-dependent and uncategorized  
 1102 neurons, both the task-invariant ( $p < 0.001$ ) and task-dependent ( $p < 0.001$ ) neurons had  
 1103 significantly larger absolute weights than the uncategorized neurons.

1104  
 1105 \* $p < 0.05$ , \*\*  $p < 0.01$ , \*\*\*  $p \leq 0.001$ , n.s., not significant ( $p > 0.05$ ).  
 1106

1107 **Table S1. Number of sessions and neurons recorded**

1108 Summary of number of neurons recorded in each subject. For some subjects, both the Stroop  
 1109 task and MSIT were performed.  
 1110

| Patients ID | Sex | Age | Stroop     |      |      | MSIT       |      |      |
|-------------|-----|-----|------------|------|------|------------|------|------|
|             |     |     | # sessions | dACC | pSMA | # sessions | dACC | pSMA |
| P9HMH       | M   | 55  | 1          | 9    | 0    | NA         | NA   | NA   |
| P11HMH      | M   | 16  | 2          | 26   | 0    | NA         | NA   | NA   |
| P14HMH      | M   | 31  | 2          | 5    | 0    | NA         | NA   | NA   |
| P16HMH      | F   | 34  | 2          | 22   | 0    | NA         | NA   | NA   |
| P19HMH      | M   | 34  | 1          | 13   | 0    | NA         | NA   | NA   |
| P21HMH      | M   | 20  | 2          | 8    | 0    | NA         | NA   | NA   |
| 'P31HMH'    | M   | 30  | 1          | 3    | 0    | NA         | NA   | NA   |
| 'P41HMH'    | M   | 19  | 1          | 2    | 0    | NA         | NA   | NA   |
| 'P42HMH'    | M   | 29  | 1          | 2    | 0    | NA         | NA   | NA   |
| 'P24CS'     | F   | 47  | 2          | 17   | 46   | NA         | NA   | NA   |
| 'P25CS'     | F   | 36  | 2          | 32   | 0    | NA         | NA   | NA   |
| 'P26CS'     | F   | 36  | 1          | 16   | 0    | NA         | NA   | NA   |
| 'P27CS'     | M   | 45  | 1          | 2    | 2    | NA         | NA   | NA   |
| 'P29CS'     | M   | 19  | 1          | 9    | 9    | NA         | NA   | NA   |
| 'P31CS'     | M   | 31  | 2          | 38   | 9    | NA         | NA   | NA   |
| 'P32CS'     | M   | 19  | 1          | 0    | 5    | NA         | NA   | NA   |
| 'P33CS'     | F   | 44  | 4          | 66   | 25   | NA         | NA   | NA   |
| 'P34CS'     | M   | 70  | 5          | 26   | 0    | 1          | 4    | 0    |
| 'P35CS'     | M   | 63  | 6          | 1    | 47   | 1          | 0    | 9    |
| 'P36CS'     | M   | 45  | 6          | 8    | 64   | NA         | NA   | NA   |
| 'P37CS'     | F   | 33  | 11         | 107  | 40   | 5          | 64   | 17   |
| 'P39CS'     | M   | 26  | 6          | 21   | 96   | NA         | NA   | NA   |
| 'P40CS'     | M   | 25  | 3          | 7    | 25   | 3          | 20   | 34   |
| 'P42CS'     | F   | 25  | 5          | 83   | 60   | 8          | 45   | 97   |
| 'P47CS'     | M   | 33  | 2          | 0    | 18   | NA         | NA   | NA   |
| 'P48CS'     | F   | 32  | 1          | 20   | 21   | NA         | NA   | NA   |
| 'P44CS'     | F   | 53  | 2          | 20   | 42   | 2          | 17   | 36   |
| 'P49CS'     | F   | 24  | NA         | NA   | NA   | 1          | 0    | 4    |
| 'P51CS'     | M   | 17  | NA         | NA   | NA   | 9          | 107  | 17   |
| 'P55CS'     | F   | 43  | NA         | NA   | NA   | 4          | 14   | 67   |
| 'P56CS'     | M   | 48  | 3          | 4    | 15   | NA         | NA   | NA   |
| 'P60CS'     | M   | 67  | NA         | NA   | NA   | 2          | 29   | 49   |
| 'P61CS'     | F   | 52  | 4          | 7    | 79   | 4          | 7    | 77   |
| 'P71CS'     | M   | 40  | 1          | 19   | 4    | 1          | 19   | 5    |

1111

1112  
1113  
1114

**Table S2. Model comparisons for RT**

Table S2

BIC of RT

|        | RT Tuned | no RT tuning | RL     |        | RT Tuned | Prev conflict |
|--------|----------|--------------|--------|--------|----------|---------------|
| MSIT   | -686.3   | -337.8       | -450.9 | MSIT   | -805.7   | -440.1        |
| Stroop | -1412.1  | -904.1       | -972.5 | Stroop | -1733.6  | -1435.1       |

1115  
1116  
1117  
1118  
1119  
1120  
1121  
1122  
1123  
1124  
1125  
1126  
1127  
1128  
1129  
1130

Model comparison for RT using BIC. To test whether our RT-tuned Bayesian model explains variance in RT better than other models, we used linear mixed-effect models that takes into account subject variability (details of the model see **Methods**) and computed BIC for these models. The conflict prior is entered as a main fixed-effect and also as a by-session random effect. Here, conflict priors generated by four models are considered: “RT tuned”, Bayesian conflict learning model with DDM hyperparameters and thus the conflict prior is tuned by RT. “No RT tuning”, Bayesian conflict learning model without incorporating DDM likelihood for RT. “RL”, a reinforcement learning model where the conflict probability is modelled as a “value” function and updated trial-by-trial by a simple update rule. “Prev conflict”, a dummy variable indicating previous trial conflict. These linear mixed-effect models all have the same number of free parameters. A separate comparison was done between the RT tuned model with the model that uses the previous conflict (sub-table on the right) because the number of trials must be kept the same for the comparison and the “prev conflict” model did not consider the first trial for each session (there was no “prev conflict” in that case).

1131 **Table S3 Model comparison for trial congruency**

Table S3

BIC of conflict

|        | RT Tuned | no RT tuning | RL    | constant prior |
|--------|----------|--------------|-------|----------------|
| MSIT   | 26517    | 26674        | 26958 | 28271          |
| Stroop | 23807    | 24039        | 24779 | 26498          |

1132  
1133  
1134

Model comparison for trial congruency using BIC. We used Bernoulli likelihood when computing BIC for the conflict sequence. Note that the number of fitted parameters for Bayesian models is

1135 zero, for the “RL” model is one (learning rate), and for “constant prior” model is one (the constant  
 1136 prior). BIC penalizes free parameters.

1137

1138

1139 **Figure S1 Behavioral models. Related to Figure 1.**

Figure S1

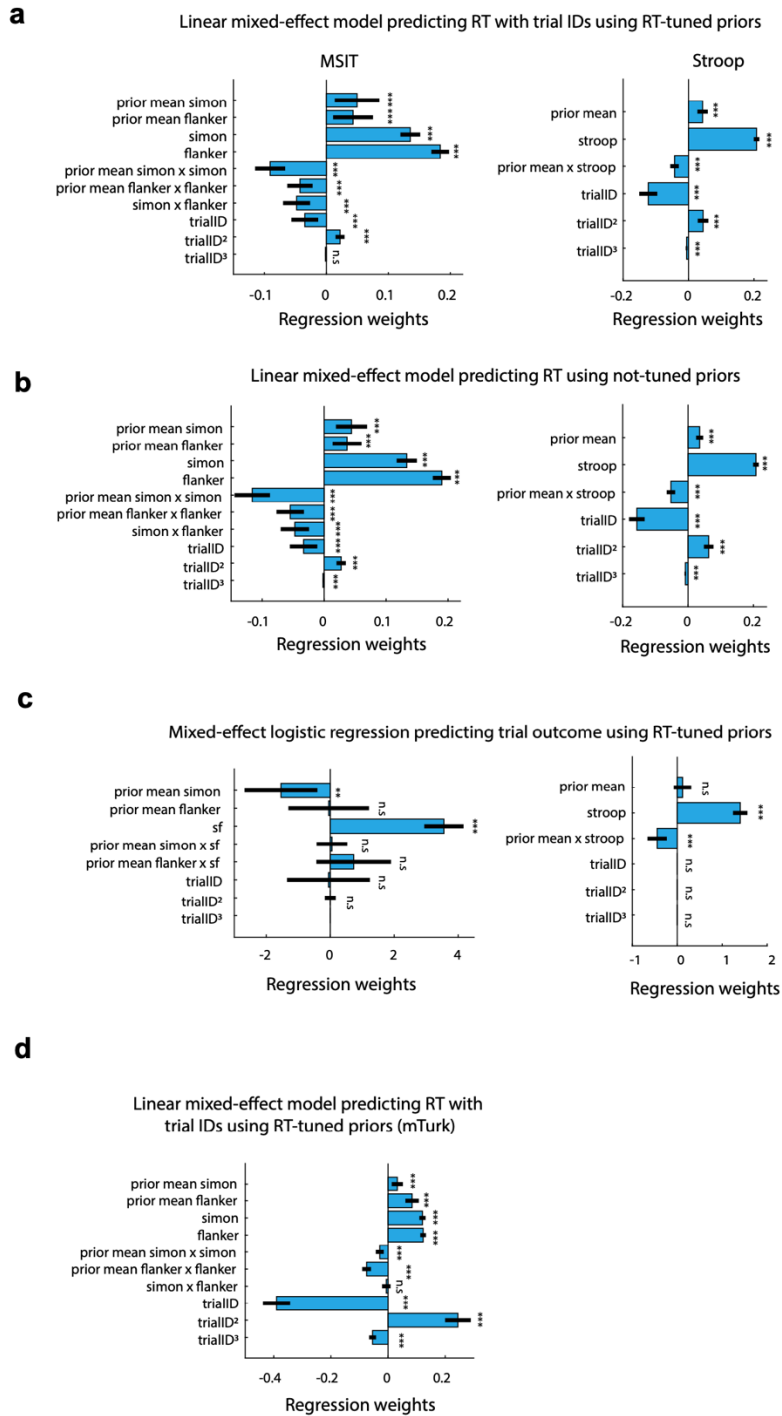

1140

1141 Statistical significance of regressors is determined by comparing the full model and a reduced  
1142 model with a particular regressor removed, using a likelihood ratio test.

1143 (a) Linear mixed-effect model for RT that incorporates trial ID regressors for MSIT (left) and  
1144 Stroop (right). Conflict priors used are from the Bayesian online learning models with RT tuning.  
1145 We added the first, second and third -order trial ID regressors to model putative practice effects.  
1146 The main effects of conflict priors, conflict, and their interaction are all significant even in the  
1147 presence of trial ID regressors, suggesting these regressors capture behavioral effect that do not  
1148 depend on trial ID.

1149 (b) Same as (a), but for the Bayesian online learning models without RT tuning. Thus, in this  
1150 instance, conflict prior is estimated based on conflict sequence alone. The main effects of conflict  
1151 priors (not tuned by RT), conflict, and their interaction are all significant in the presence of trial  
1152 ID regressors. Therefore, RT tuning improves conflict prior (see (a) and Table S2, S3), but this is  
1153 not required.

1154 (c) Mixed-effect logistic regression for predicting trial outcome (error or correct) for MSIT (left)  
1155 and Stroop (right). Conflict priors used are from the Bayesian online learning models with RT  
1156 tuning. For MSIT, we consider only “sf” trials for conflict trials, on which most of errors occur, and  
1157 non-conflict trials. Conflict prior reduces error likelihood in both MSIT (significant main effect,  $p$   
1158 = 0.009) and Stroop (significant interaction term),  $p < 0.001$ ).

1159 (d) Linear mixed-effect model for RT that incorporates trial ID regressors for MSIT. Data were  
1160 collected from online participants using Amazon Mechanical Turk.

1161  
1162 **Figure S2. DDM hyperparameters used in Bayesian conflict learning models. Related to Figure**  
1163 **1.**

Figure S2

**a**

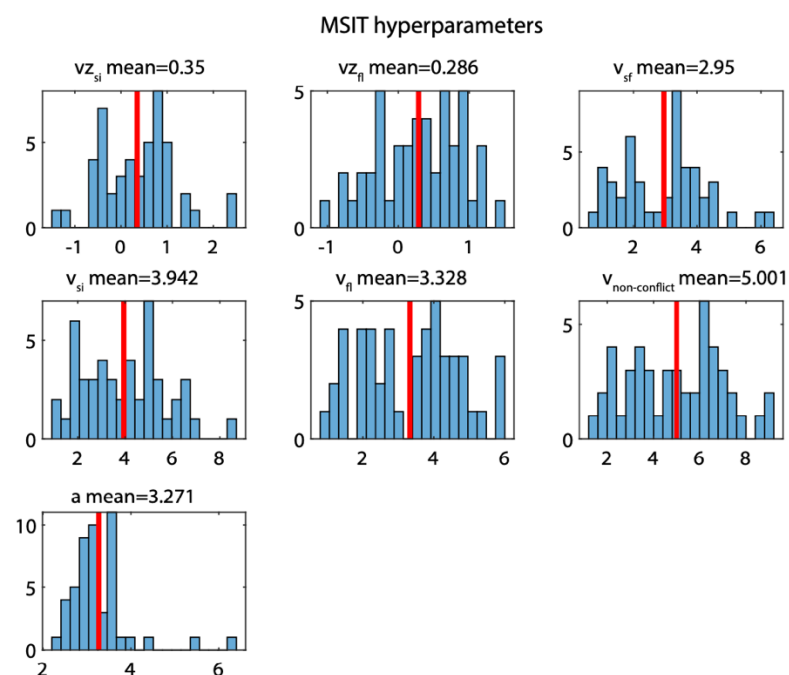

**b**

Stroop hyperparameters

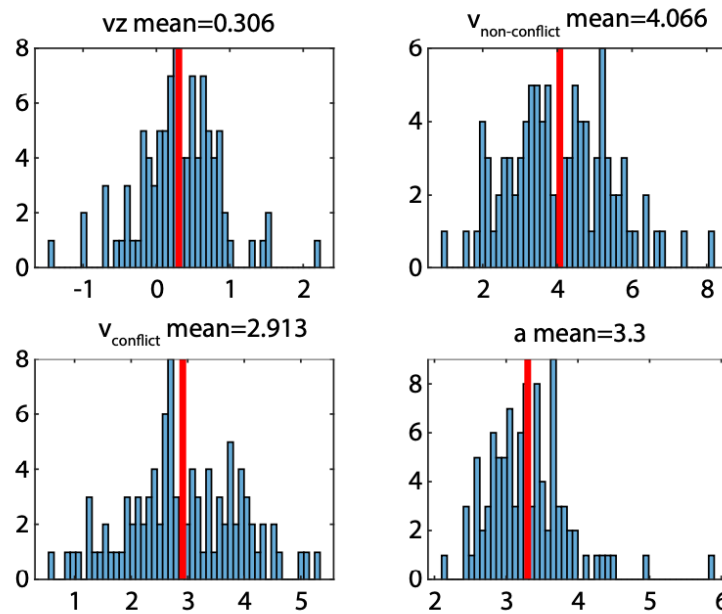

1165  
1166 (a) Hyperparameters used in the Bayesian conflict learning model for MSIT.  $v_{z_{si}}$  and  $v_{z_{fl}}$  are  
1167 coefficients scaling Simon and Flanker prior.  $v_{sf}$ ,  $v_{si}$ ,  $v_{fl}$ ,  $v_{non-conflict}$  are base drift rates in  
1168 both Simon and Flanker present (“sf”), Simon-only (“si”), Flanker-only (“fl”), non-conflict trials.  $a$   
1169 is the boundary separation. The effective drift rate was the sum of the base drift rate and the  
1170 scaled conflict prior. The base drift rates were significantly different from each other ( $p < 0.001$ ,  
1171 ANOVA). Post-hoc pairwise testing from a multiple comparison test determined that  $v_{si}$  did not  
1172 differ significantly from  $v_{fl}$ ;  $v_{sf}$  were significantly larger than either  $v_{si}$  or  $v_{fl}$ ; both  $v_{si}$  and  $v_{fl}$   
1173 were significantly larger than  $v_{non-conflict}$ . These

1174 (b) Hyperparameters used in the Bayesian conflict learning model for Stroop.  $v_z$  is the coefficient  
1175 scaling Stroop prior.  $v_{conflict}$ ,  $v_{non-conflict}$  are base drift rates in conflict and non-conflict trials.  
1176  $a$  is the boundary separation.  $v_{non-conflict}$  are significantly larger than  $v_{conflict}$  across sessions  
1177 ( $p < 0.001$ , t test).

1178 Hyperparameters are used in the DDM likelihood function for tuning the prior estimation process  
1179 using an expectation-maximization algorithm.

1180  
1181 \* $p < 0.05$ , \*\*  $p < 0.01$ , \*\*\*  $p < 0.001$ , n.s., not significant ( $p > 0.05$  or not significant determined  
1182 using FDR).

1183

1184

1185

1186

**Figure S3. Neuronal selection by areas and ERP analysis. Related to Figure 3.**

Figure S3

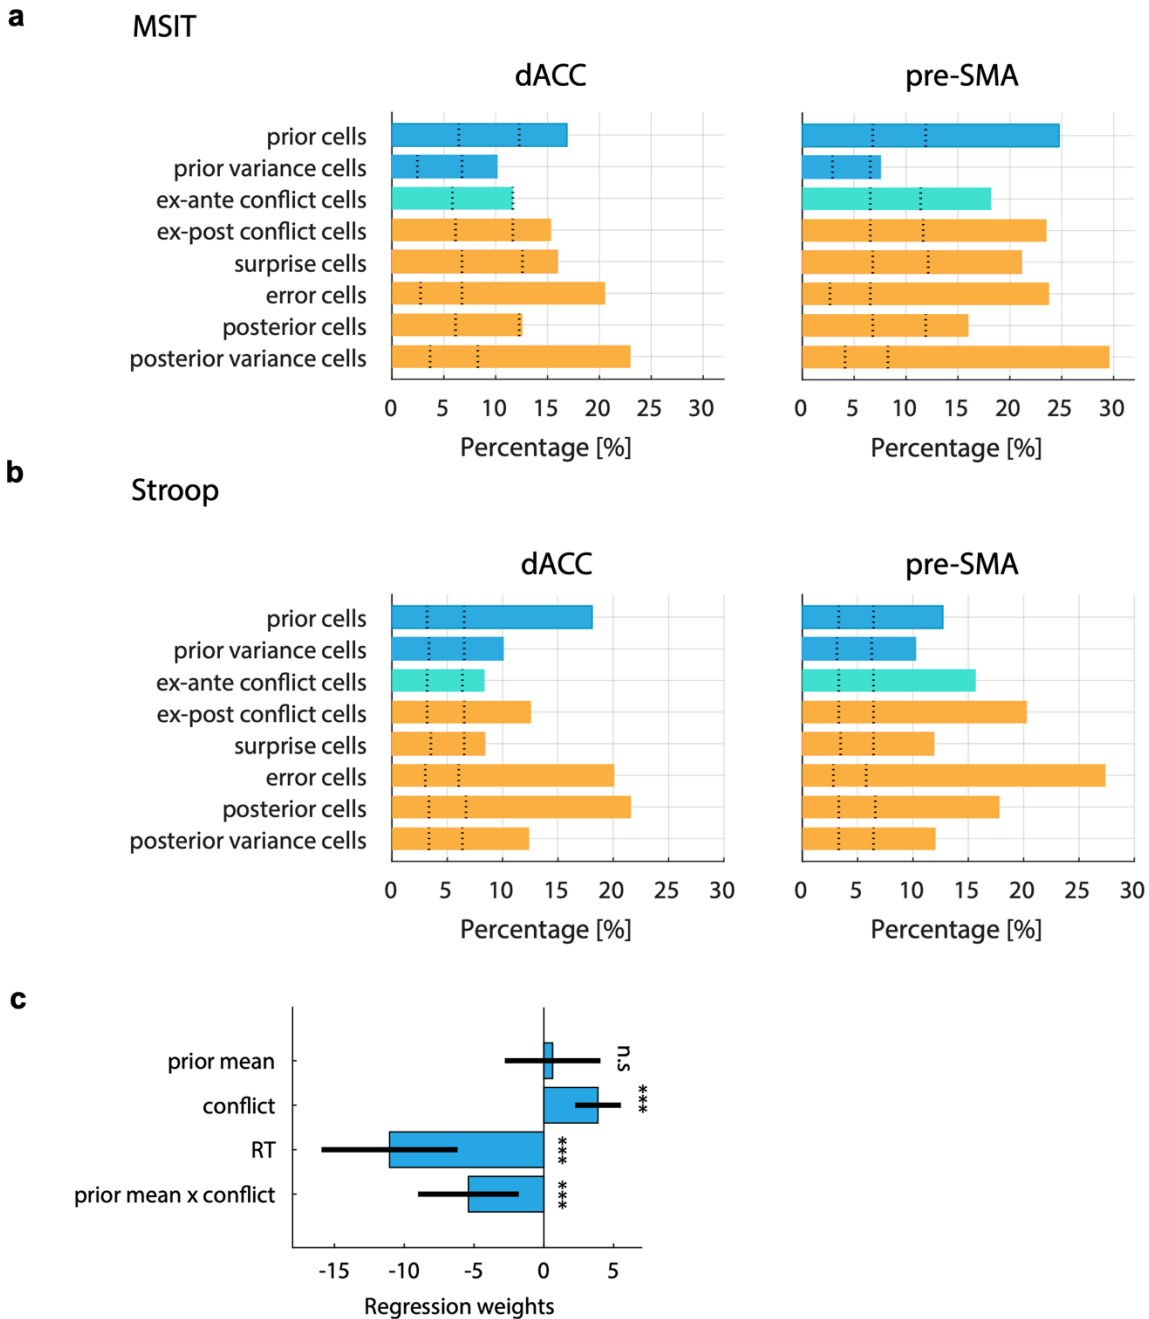

1187

1188 (a) Percentages of significant neurons in both dACC (left) and pre-SMA (right) in MSIT.

1189 (b) Percentages of significant neurons in both dACC (left) and pre-SMA (right) in Stroop.

1190 Dotted lines represent 2.5<sup>th</sup> and 97.5<sup>th</sup> percentiles of the null distribution obtained from

1191 permutation. For all groups shown,  $p < 0.001$ . Patterns of neuronal selection are similar between

1192 dACC and pre-SMA.

1193 (c) Linear mixed-effect model for CRP amplitude in the Stroop task. Conflict priors used are from

1194 the Bayesian online learning models with RT tuning. The main effects of conflict, RT and the

1195 interaction between prior and conflict were all significant. The main effect of conflict prior was  
1196 not significant. Statistical significance was determined by a likelihood ratio test (comparing  
1197 between the full model and the reduced models with regressors of interest removed).  
1198

1199 **Figure S4. Population decoding of error and conflict by areas. Related to Figure 5.**  
1200

Figure S4

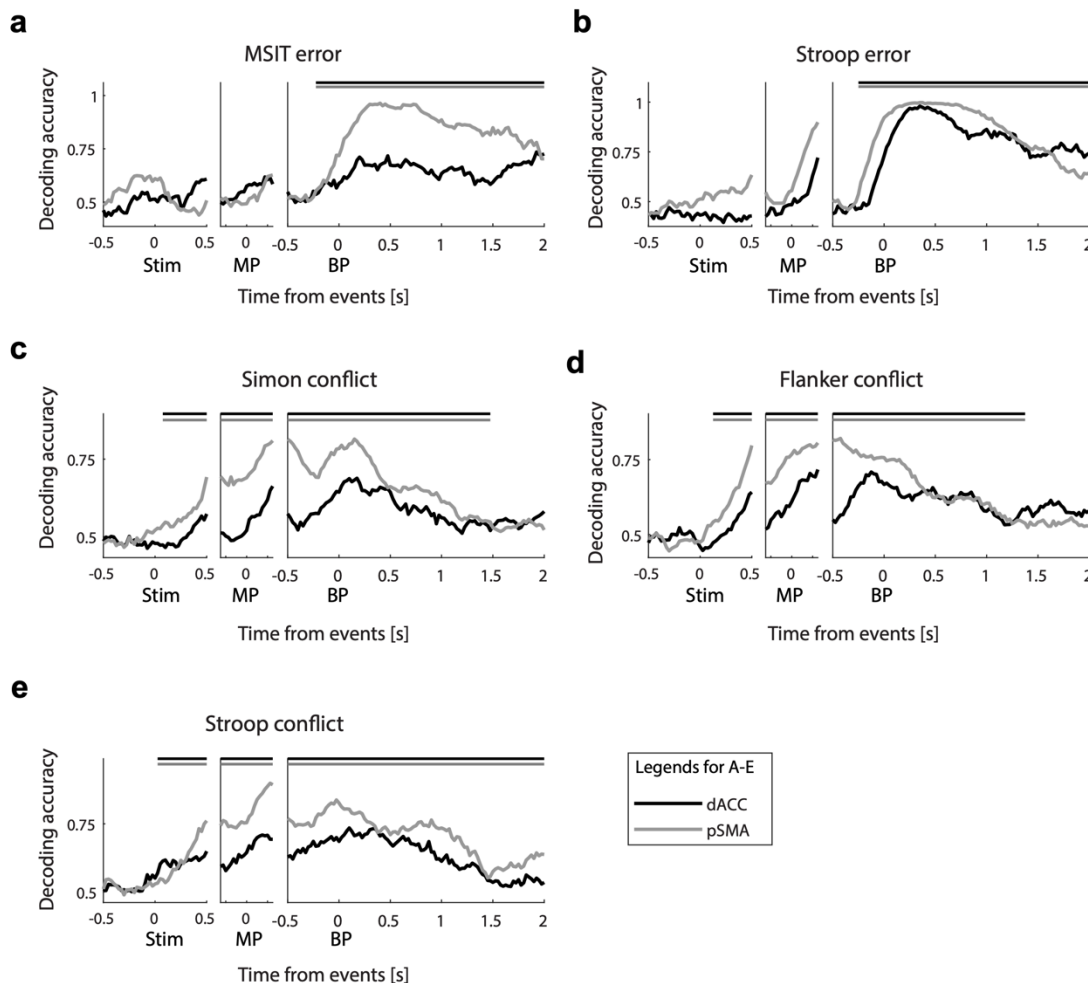

1201 (a-e) Population decoding accuracy for MSIT error (a), Stroop error (b), Simon conflict (c), Flanker  
1202 conflict (d), Stroop conflict (e). For (a-e), black traces are from dACC data and grey traces are  
1203 from pre-SMA data. Horizontal bars at the top demarcate significant cluster as determined by  
1204 the cluster-based permutation test ( $p < 0.05$ ). Overall dynamics are similar between dACC and  
1205 pre-SMA, though the decoding accuracy on average is lower in the former.  
1206

1207

1208

1209 **Figure S5. Population decoding of prior/posterior (Flanker and Stroop) and past-trial conflict.**  
1210 **Related to Figure 5.**

Figure S5

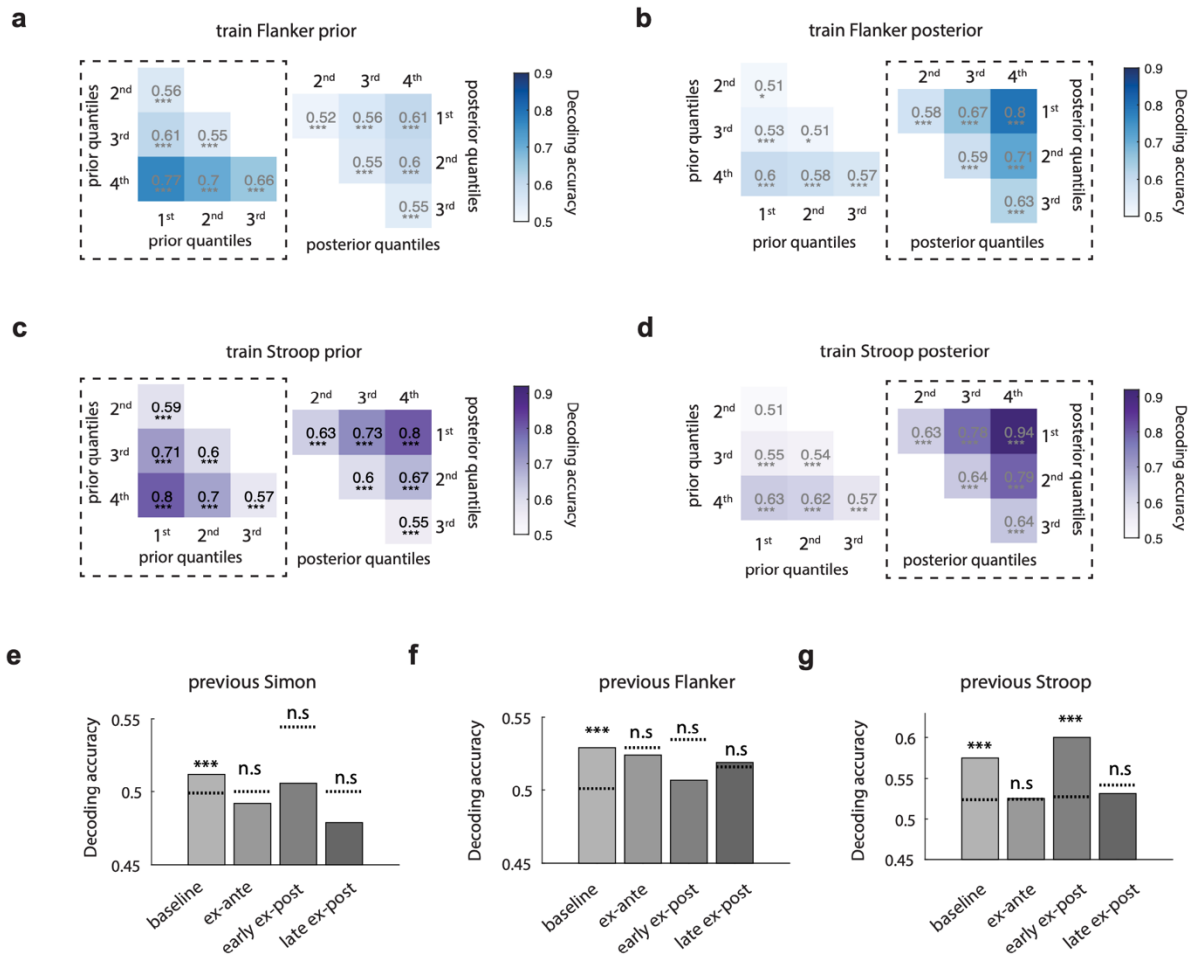

1211  
 1212 (a-d) Decoding accuracy for classifying between pairs of Flanker (a-b) and Stroop (c-d) prior or  
 1213 posterior quartiles. Color bars show decoding accuracy. Dotted frames mark the within-time  
 1214 decoding results. Decoders that classify prior quartiles are trained using baseline spike counts  
 1215 (1.5s before stimulus onset), whereas decoders that classify posterior quartiles are trained using  
 1216 ex-post spike counts (2s after button press). To test temporal generalization of these decoders,  
 1217 prior-trained decoders are tested with posterior data and labels, and vice versa. Dashed boxes  
 1218 represent within-time decoding.

1219 (e-g) Population decoding of Simon (e), Flanker (f), Stroop (g) on the immediately preceding trial  
 1220 in different epochs. Dotted lines show 97.5% percentile from the null distribution (permutation).  
 1221 During baseline, there is significant coding of past trial conflict as expected from the persistence  
 1222 of ex-post conflict signals. Coding of the past trial conflict was non-significant during all other  
 1223 epochs except for past trial Stroop conflict in the early ex-post epochs, suggesting that this  
 1224 information in our experimental setup was likely not reliable for cognitive control.

1225  
 1226 \* $p < 0.05$ , \*\*  $p < 0.01$ , \*\*\*  $p < 0.001$ , n.s., not significant ( $p > 0.05$  or not significant determined  
 1227 using FDR).  
 1228



1229  
1230  
1231

**Figure S6. Within-task state space analyses. Related to Figure 6.**

**Figure S6**

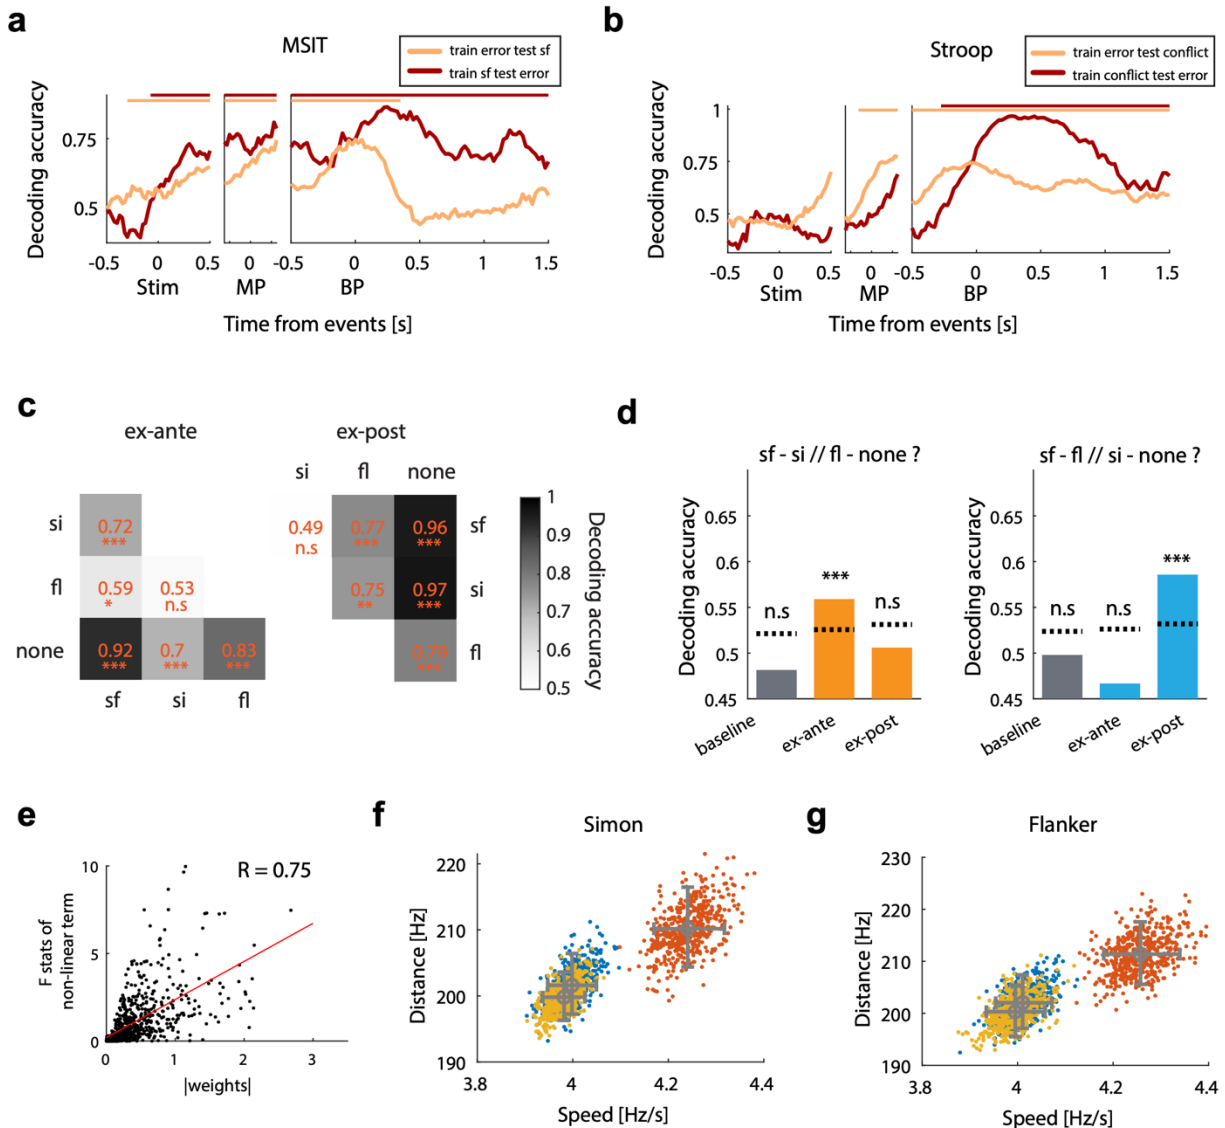

1232  
1233  
1234  
1235  
1236  
1237  
1238  
1239  
1240  
1241  
1242

(a) A common population coding dimension for error and conflict in MSIT. This coding dimension is extracted using dPCA, using an error contrast (error “sf” trials vs. “sf” trials) and a conflict contrast (“sf” trials vs. no conflict). “sf” trials are split into two non-overlapping groups for this. Plot show the decoding accuracy of both sf (apricot) vs no-conflict trials, and error “sf” vs. “sf” trials (out-of-sample). Horizontal bars at the top demarcate significant clusters, as determined by the cluster-based permutation test ( $p < 0.05$ ).

(b) A common population coding dimension for both error and conflict in Stroop. This coding dimension is extracted using dPCA, using an error contrast (error conflict trials vs. conflict trials) and a conflict contrast (conflict trials vs. no conflict) and by marginalizing out the contrast dimension. Conflict trials are split into two non-overlapping groups for this. Plot show the

1243 decoding accuracy of both sf (apricot) vs no-conflict trials, and error “sf” vs. “sf” trials (out-of-  
1244 sample). Horizontal bars at the top demarcate significant clusters, as determined by the cluster-  
1245 based permutation test ( $p < 0.05$ ).

1246 (c) Decoding accuracy of pairwise classification of conflict conditions after RT was equalized  
1247 across conditions. Trials were selected such that RTs on si, fl, sf and non-conflict trials were  
1248 equalized ( $p > 0.1$ , t test). Training data and left-out testing data from the four conflict conditions  
1249 are projected to the population vector flanked by averages of non-conflict trials and sf trials,  
1250 shown as the dotted line in Figure 6a. Color code represents decoding accuracy. This coding  
1251 dimension separates the four conflict conditions well.

1252 (d) Testing compositionality of conflict representation with condition generalization of decoding  
1253 on error trials. We tested the condition generalization using raw spike count data from the ex-  
1254 ante and ex-post (1s after button presses) epochs and from the baseline as a control without  
1255 dimensionality reduction. We only used data on error trials for this analysis. Data from the means  
1256 connected by one of the blue edges in Figure 6a were used to train a decoder, which was then  
1257 tested with left-out data from the means connected by the opposite blue edge, and vice versa.  
1258 Blue bars show decoding accuracy. Same was also tested with data connected by the orange  
1259 edges as shown in Figure 6a. Orange bars show decoding accuracy. Decoding accuracy were  
1260 reduced on error trials compared to on correct trials (compare with Figure 6d). Dotted lines show  
1261 97.5<sup>th</sup> percentile of the null distribution from permutation.

1262 (e) Single neuron with nonlinear coding of Simon and Flanker conflict contribute to deviation of  
1263 conflict representation from perfect linearity. Data used here are from the ex-ante epoch.  
1264 Nonlinear coding of conflict by a single neuron is measured by the F statistic of the interaction  
1265 term between Simon and Flanker conflict in an ANOVA model with spike counts as the dependent  
1266 variable. Each neuron’s contribution to the deviation from linear additivity in the high  
1267 dimensional neural space is quantified by the weight of the difference vector between “sf” and  
1268 “si + fl”. Scatter plot shows the relation between these two measures. Red line shows the linear  
1269 fit.

1270 (f) Distance between trajectories and average speed computed from trials grouped by quartiles  
1271 of Simon conflict prior in the baseline (blue) and the ex-ante (orange) epoch, and trials grouped  
1272 by Simon conflict posterior in the ex-post epoch (yellow). Trajectories are visualized in Figure 6f.  
1273 The state space speed stays low during baseline, increases significantly during the ex-ante epoch  
1274 and decreases back to a value similar to that during the baseline. Distance between trajectories  
1275 is stable across time.

1276 (g) Same as in (f) but for Flanker conflict prior.

1277

1278 **Figure S7. Domain-general representation of performance monitoring signals. Related to Figure**  
1279 **7.**

Figure S7

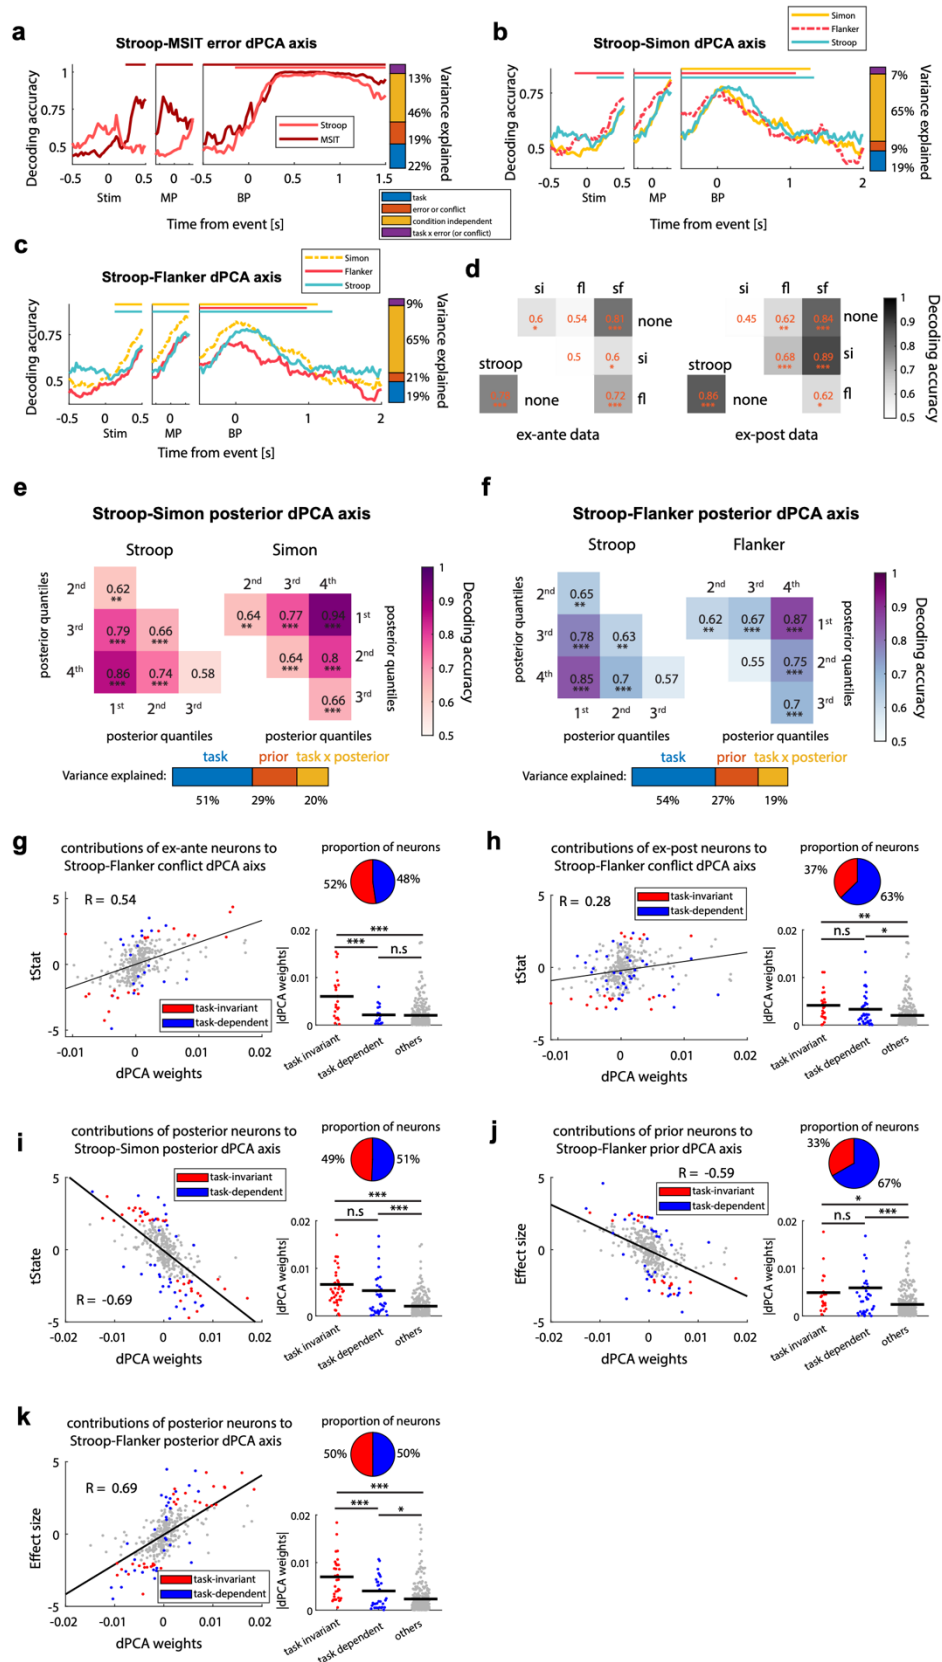

1281 (a) Task-invariant decoding of errors in both MSIT (salmon) and Stroop (crimson) after RTs were  
1282 equalized across conditions. Specifically, trials were selected for Stroop such that the RTs on error  
1283 conflict trials did not differ significantly those from correct conflict trials ( $p > 0.1$ , t-test). For MSIT,  
1284 trials were selected such that RTs on error “sf” trials and correct “sf” trials did not differ  
1285 significantly ( $p > 0.1$ , t test). The task-invariant coding dimension is extracted using dPCA that  
1286 marginalizes out task information and time. This dPCA coding dimension is extracted from the  
1287 error contrast in Stroop (error conflict vs. correct conflict trials) and the error contrast in MSIT  
1288 (error “sf” trials and correct “sf” trials). This controls for trial conflict and isolates effects related  
1289 only to error. Left, Accuracy for decoding errors as a function of time. Bar on the right shows the  
1290 variance explained by the different dPCA components (color code see figure legend).

1291 (b-c) Task-invariant decoding of conflict in both MSIT (Simon, yellow; Flanker red) and Stroop  
1292 (green) after RTs were equalized across conditions. Because MSIT has two conflict conditions,  
1293 Simon and Flanker, task invariance was investigated using Stroop/Simon and Stroop/Flanker  
1294 conflicts separately. Specifically, trials were selected for Stroop such that RTs on conflict and non-  
1295 conflict trials did not differ significantly ( $p > 0.1$ , t test). For MSIT, trials were selected such that  
1296 RTs on Simon and non-Simon trials did not differ significantly ( $p > 0.1$ ) and those on Flanker and  
1297 non-Flanker trials did no differ significantly ( $p > 0.1$ ). This dPCA coding dimension is extracted  
1298 from conflict and non-conflict trials in Stroop and either from Simon and non-Simon trials (b) or  
1299 from Flanker and non-Flanker trials (c), by marginalizing out task information and time. Left-out  
1300 conflict trials and non-conflict trials in Stroop, and left-out Simon, non-Simon, Flanker, non-  
1301 Flanker trials in MSIT are projected and classified by this coding dimension. Left, decoding  
1302 accuracy of conflict as a function of time. The bar on the right shows variance explained by the  
1303 different dPCA components (color code see figure legend).

1304 (d) Testing separability of conflict conditions in Stroop and MSIT using data from the ex-ante (left)  
1305 and ex-post epochs (right) after RTs were equalize across conditions. Here, trials were selected  
1306 for Stroop such that RTs on conflict and non-conflict trials did not differ significantly ( $p > 0.1$ , t  
1307 test). For MSIT, trials were selected such that RTs on si, fl,sf, and non-conflict trials did not differ  
1308 with each other significantly ( $p > 0.1$ , t test). The dPCA coding dimension used in this analysis is  
1309 extracted by using conflict and non-conflict trials in Stroop and sf and non-conflict trials in MSIT  
1310 by marginalizing out task information. Because data from ROIs are used, temporal information is  
1311 already marginalized out before being used by the dPCA algorithm. This coding dimension  
1312 support classification of 75% of pairs of MSIT conflict conditions (upper triangle matrices) as well  
1313 as Stroop conflict (left corner). Color coding represents decoding accuracy, orange numbers  
1314 indicate the numerical values of decoding accuracy of that pair of conflict conditions.

1315 (e) Task-invariant decoding of all pairs of conflict posterior quartiles in Stroop (lower triangle  
1316 matrix) and Simon (upper triangle matrix). The dPCA coding dimension here is extracted using  
1317 the Stroop conflict posterior contrast (the 1<sup>st</sup> vs. 4<sup>th</sup> quartiles of Stroop conflict posterior) and the  
1318 Simon conflict posterior contrast (the 1<sup>st</sup> vs. 4<sup>th</sup> quartiles of Simon conflict posterior),  
1319 marginalizing out task information. Color code represents decoding accuracy. Bar at the bottom  
1320 shows variance explained of dPCA components (for decoding, the component labelled as  
1321 “posterior” is used).

1322 (f) Same as in (e) but for Flanker posterior.

1323 (g-k) Contribution of single neuron coding of Stroop-Flanker ex-ante conflict (g), Stroop-Flanker  
1324 ex-post conflict (h), Stroop-Simon posterior (i), Stroop-Flanker prior (j) and Stroop-Flanker

1325 posterior (k) to the task-invariant population coding of these variables. Because MSIT has two  
1326 conflict conditions, Simon and Flanker, task invariance was tested between Stroop and Simon or  
1327 between Stroop and Flanker separately. We modelled each neuron's baseline (j), ex-ante (g) or  
1328 ex-post (h,i,k) response using linear regression. The main effects are a dummy variable indicating  
1329 Stroop-Flanker conflict (g,h) or Stroop-Simon posterior (i) or Stroop-Flanker prior (j) or Simon-  
1330 Flanker posterior (k) and task ID (Stroop or MSIT), and the interaction term between these two.  
1331 A significant interaction suggests that the coding is more prominent in one task than the other.  
1332 Task-invariant neurons is defined as having a significant main effect of the variable of interest but  
1333 an insignificant interaction with the task ID. Task-dependent neurons is defined as having a  
1334 significant interaction term.

1335 (g) Contribution of single neuron ex-ante coding of Stroop-Flanker conflict to task-invariant  
1336 population coding of Stroop-Flanker conflict. Of the 42 of neurons that were selected as signaling  
1337 conflict in the ex-ante epoch in either task, 52% did so in a task-invariant way (red) and 48% in a  
1338 task-dependent (blue) way (pie chart). There is a strong correlation between the error t-statistic  
1339 and the dPCA weight of a particular neuron (scatter plot on the left;  $r = 0.54$ ). Comparing the  
1340 mean absolute value of dPCA weights between task-invariant, task-dependent and uncategorized  
1341 neurons, the task-invariant neurons had significantly larger absolute weights than the task-  
1342 dependent neurons ( $p < 0.001$ ) and uncategorized neurons ( $p < 0.001$ ).

1343 (h) Contribution of single neuron ex-post coding of Stroop-Flanker conflict to task-invariant  
1344 population coding of Stroop-Flanker conflict. Of the 59 of neurons that were selected as signaling  
1345 conflict in the ex-post epoch in either task, 37% did so in a task-invariant way (red) and 67% in a  
1346 task-dependent (blue) way (pie chart). There is a strong correlation between the error t-statistic  
1347 and the dPCA weight of a particular neuron (scatter plot on the left;  $r = 0.28$ ). Comparing the  
1348 mean absolute value of dPCA weights between task-invariant, task-dependent and uncategorized  
1349 neurons, both the task-invariant ( $p < 0.01$ ) and task-dependent ( $p < 0.05$ ) neurons had  
1350 significantly larger absolute weights than the uncategorized neurons.

1351 (i) Contribution of single neuron ex-post coding of Stroop-Simon conflict posterior to task-  
1352 invariant population coding of Stroop-Simon conflict prior. Of the 79 of neurons that were  
1353 selected as signaling posterior in the ex-post epoch in either task, 49% did so in a task-invariant  
1354 way (red) and 51% in a task-dependent (blue) way (pie chart). There is a strong correlation  
1355 between the error t-statistic and the dPCA weight of a particular neuron (scatter plot on the left;  
1356  $R = 0.51$ ). Comparing the mean absolute value of dPCA weights between task-invariant, task-  
1357 dependent and uncategorized neurons, both the task-invariant ( $p < 0.001$ ) and task-dependent  
1358 ( $p < 0.001$ ) neurons had significantly larger absolute weights than the uncategorized neurons.

1359 (j) Contribution of single neuron baseline coding of Stroop-Flanker conflict prior to task-invariant  
1360 population coding of Stroop-Flanker conflict prior. Of the 58 of neurons that were selected as  
1361 signaling prior in the baseline in either task, 33% did so in a task-invariant way (red) and 67% in  
1362 a task-dependent (blue) way (pie chart). There is a strong correlation between the error t-statistic  
1363 and the dPCA weight of a particular neuron (scatter plot on the left;  $r = -0.59$ ). Comparing the  
1364 mean absolute value of dPCA weights between task-invariant, task-dependent and uncategorized  
1365 neurons, both the task-invariant ( $p < 0.05$ ) and task-dependent ( $p < 0.001$ ) neurons had  
1366 significantly larger absolute weights than the uncategorized neurons.

1367 (k) Contribution of single neuron ex-post coding of Stroop-Flanker conflict posterior to task-  
1368 invariant population coding of Stroop-Flanker conflict posterior. Of the 66 of neurons that were

1369 selected as signaling posterior in the ex-post epoch in either task, 50% did so in a task-invariant  
1370 way (red) and 50% in a task-dependent (blue) way (pie chart). There is a strong correlation  
1371 between the error t-statistic and the dPCA weight of a particular neuron (scatter plot on the left;  
1372  $r = 0.69$ ). Comparing the mean absolute value of dPCA weights between task-invariant, task-  
1373 dependent and uncategorized neurons, both the task-invariant ( $p < 0.001$ ) and task-dependent  
1374 ( $p < 0.05$ ) neurons had significantly larger absolute weights than the uncategorized neurons, and  
1375 the task-invariant had significantly larger values than the task-dependent neurons ( $p < 0.001$ ).

1376  
1377  
1378  
1379

## 1380 **Methods**

1381

### 1382 **Tasks**

1383

1384 Subjects performed a speeded version of the Stroop and Multi-Source Interference (MSIT) tasks.  
1385 For the Stroop task, subjects were shown a series of randomly intermixed color words (“red”,  
1386 “green”, “blue”) printed in either red, green, or blue color (see Figure 1a). Subjects were  
1387 instructed to name the color the word stimulus was printed in while ignoring its meaning and to  
1388 do so as quickly and accurately as possible. For the MSIT task, subjects were shown an array of  
1389 three numbers (0,1,2,3), out of which two were the same and the third of which was different  
1390 (target). Subjects were instructed to press the button identical to the target number (which was  
1391 unique) regardless of the position at which it was shown. For both tasks, all responses were  
1392 recorded as button presses using an external response box (RB-740, Cedrus Corp., San Pedro, CA).  
1393 For both tasks, the stimulus disappeared immediately when a button was pressed and was  
1394 followed by a blank screen for 1s, followed by a feedback screen, which was shown for 1s. Subject  
1395 were given three types of feedback: correct, incorrect or “too slow”. 10-15% of trials were rated  
1396 as “too slow” based on an adaptive response threshold (see (Fu et al., 2019) for details), which  
1397 we used to emphasize the need to respond quickly and thereby resulting in a sufficiently large  
1398 error rate (~10% of trials). The inter-trial interval was sampled randomly from a uniform  
1399 distribution between 1.5s to 2s. Trial sequences were pseudo-randomized and designed to avoid  
1400 back-to-back repetitions of the same stimulus. The proportion of conflict trials in the Stroop task  
1401 was 30-40%; For MSIT, the proportions of Simon only (“si”), Flanker only (“fl”), Simon and Flanker  
1402 coincident (“sf”) trials are 15%, 15%, and 30%, respectively (the remaining 40% of trials have no  
1403 conflict). The tasks were implemented in MATLAB (The Mathworks, Inc., Natick, MA) using  
1404 Psychtoolbox-3 (Brainard, 1997). The two tasks were performed in sequence, i.e., subjects  
1405 finished blocks of one task first and then moved on to blocks of the other task. The order of task  
1406 performed was randomized across experimental sessions.

1407

### 1408 **Behavioral controls**

1409

1410 As a control, we additionally collected behavioral data from  $N = 51$  normal control subjects (24  
1411 females; age mean $\pm$ sd: 44 $\pm$ 11) using the Amazon mTurk platform. We implemented the MSIT  
1412 task as described above using the jsPsych toolbox (de Leeuw, 2015). These behavioral data were

1413 analyzed using the same methods as documented below. These control subjects exhibited a  
1414 robust conflict prior effect like the patients (see Figure S1d).

1415

## 1416 **Subjects**

1417

1418 34 patients (see Table S1 for age and gender) who were evaluated for possible surgical treatment  
1419 of their focal epilepsy using implantation of depth electrodes volunteered for the study and gave  
1420 written informed consent. We only included patients with well-isolated single- neuron activity on  
1421 at least one electrode in the areas of interest. All research protocols were approved by the  
1422 institutional review boards of Cedars-Sinai Medical Center, Huntington Memorial Hospital, and  
1423 California Institute of Technology.

1424

1425

## 1426 **Electrophysiological recordings**

1427

1428 We analyzed data from up to 4 electrodes in each subject (bilateral dACC and pre-SMA) in this  
1429 paper. For each depth electrode, there are eight microwires with high impedance microwires at  
1430 the tip, and eight macro contacts with low impedance along the shaft (AdTech Medical Inc.). Data  
1431 from all microwires and the most medial macro contact (which is placed within dACC or pre-SMA)  
1432 are analyzed in this paper. For recordings from microwires, the sampling rate was 32-40kHz and  
1433 the raw signal was acquired broadband (0.01Hz-9kHz). One microwire on each depth electrode  
1434 was designated as a local reference wire. For intracranial EEG recordings done with macro  
1435 contacts, the sampling rate was 2kHz (ATLAS, Neuralynx, Inc., Bozman, MT).

1436

### 1437 Electrode localization

1438

1439 Electrodes were localized using a combination of a pre-operative MRI and a postoperative  
1440 MRI/CT using standard procedures we described elsewhere (Fu et al., 2019; Minxha et al., 2017).  
1441 Only electrodes that could be clearly localized to the dACC (cingulate gyrus or cingulate sulcus;  
1442 for patients with a paracingulate sulcus, electrodes were assigned to the dACC if they were within  
1443 the paracingulate sulcus or superior cingulate gyrus) or the pre-SMA (superior frontal gyrus) were  
1444 included.

1445

### 1446 Spike detection and sorting

1447

1448 We filtered the raw broadband signal with a zero-phase lag filter in the 300-3000Hz band. Spikes  
1449 were detected and sorted using a template-matching algorithm (Rutishauser et al., 2006). Sorting  
1450 quality is evaluated using the same metrics reported in (Fu et al., 2019) and only well-isolated  
1451 single units are included in this paper. Channels with interictal epileptic events were excluded.

1452

## 1453 **Quantification and statistical analyses**

1454

### 1455 Behavioral modelling and analyses

1456

1457 We developed a series of Bayesian conflict learning models to infer subjects' internal estimate of  
1458 conflict probability (details see below). For this analysis, we concatenated all blocks of an  
1459 experiments done in a single session. For trials with unusually long RTs (> 3 sd from the mean of  
1460 the whole experiment), we replaced the outlier's RT with the average RT computed from the  
1461 neighboring 6 trials. We estimate the Bayesian model parameters using all trials but excluded  
1462 error trials (after fitting) for analyses that focuses on conflict and conflict prior. We then analyzed  
1463 whether the variance of RT was related to the estimated parameters using linear mixed-effect  
1464 models (Aarts et al., 2014). For MSIT, the linear mixed-effect model is specified as follows (all  
1465 models are represented in Wilkinson's notation):

$$1466 \log(RT) \sim \textit{Simon prior} * \textit{Simon conflict} + \textit{Flanker prior} * \textit{Flanker conflict} + (1 \\ 1467 + \textit{Simon prior} + \textit{Flanker prior} | \textit{sessionID: subjectID})$$

1468  
1469 For Stroop, this is specified as:

$$1470 \log(RT) \sim \textit{Stroop prior} * \textit{Stroop conflict} + (1 + \textit{Stroop prior} | \textit{sessionID: subjectID})$$

1471  
1472 Here, the fixed effects of Simon, Flanker and Stroop conflicts are dummy variables indicating  
1473 whether a particular trial involves conflict (value = 1) or not (value = 0). The fixed effects for priors  
1474 are obtained from our Bayesian conflict learning models as detailed below. To test if RT was  
1475 affected by conflict on the immediately preceding trial, represented by *Simon prevConflict*,  
1476 *Flanker prevConflict* and *Stroop prevConflict*, we again constructed a linear mixed-effect  
1477 models for both MSIT and Stroop. For MSIT, the model is specified as follows:

$$1480 \log(RT) \sim \textit{Simon prevConflict} * \textit{Simon conflict} + \textit{Flanker prevConflict} \\ 1481 * \textit{Flanker conflict} + (1 | \textit{sessionID: subjectID})$$

1482  
1483 For Stroop, this is specified as:

$$1484 \log(RT) \sim \textit{Stroop prevConflict} * \textit{Stroop conflict} + (1 | \textit{sessionID: subjectID})$$

1485  
1486 We investigated the effect of conflict prior on the likelihood of making an error using generalized  
1487 linear mixed-effect models. For MSIT, this model is given as

$$1488 \textit{Outcome} \sim \textit{Simon prior} * \textit{SF} + \textit{Flanker prior} * \textit{SF} + (1 + \textit{Simon prior} \\ 1489 + \textit{Flanker prior} | \textit{sessionID: subjectID})$$

1490  
1491 where *SF* is a dummy variable indicating whether the trial has both Simon and Flanker conflict  
1492 (value = 1) or non-conflict (value = 0). We restricted this analysis to sf trials because most errors  
1493 occurred on these trials. For Stroop, this model is given as

$$1494 \textit{Outcome} \sim \textit{Stroop prior} * \textit{Stroop conflict} + (1 + \textit{Stroop prior} | \textit{sessionID: subjectID})$$

1495 The response variable *Outcome* is a categorical variable indicating whether the trial ended in a  
1496 correct (0) or incorrect (1) response.

1500



1501 To determine the statistical significance of each fixed effect, we compared the full model with a  
1502 reduced model where the fixed effect in question was removed using the likelihood ratio test. To  
1503 determine whether RT tuning of the model (see below) is necessary for conflict prior to explain  
1504 RT variance, we switched out the conflict prior with the one estimated without RT tuning and  
1505 kept all other terms the same. Statistical significance determined this way was indicated by stars  
1506 or “n.s” (non-significant) in Figures 1 and S1. To determine whether the conflict prior explains  
1507 variance in RT and error likelihood independent of practice, which is assumed to vary with the  
1508 trial number, we augmented the aforementioned mixed-effect models by including three  
1509 additional trial-ID terms:  $trialID$ ,  $trialID^2$ ,  $trialID^3$  to capture variance related to practice  
1510 effects.

1511

1512

### 1513 Bayesian conflict learning models

1514

1515 Our models are structurally similar to those used in several previous studies (Behrens et al., 2007;  
1516 Jiang et al., 2015). Here, we briefly highlight the modifications we made to extend these existing  
1517 models to model behavior in both the Stroop and MSIT tasks, the latter of which has two types  
1518 of conflicts that are monitored at the same time. Our models have the following parameters (see  
1519 Fig. 1c for a schematic of the model structure): 1) a flexible learning rate  $\alpha$ , which captures the  
1520 subject’s belief in the rate of change in control demand in the environment (i.e., a change in  
1521 conflict probability), and 2) conflict probability ( $q_s$  for Stroop conflict in the model for Stroop,  $q_{si}$   
1522 for Simon and  $q_{fl}$  for Flanker conflicts in the model for MSIT). The models utilize two types of  
1523 data (both of which are only available after a trial’s response has been made): 1) trial congruency  
1524  $o$  (value of 1 indicates an incongruent trial;  $o_s$  for Stroop congruency,  $o_{si}$  for Simon congruency  
1525 and  $o_{fl}$  for Flanker congruency; 2) reaction time  $RT$ , assigning Bernoulli likelihood function to the  
1526 former and the drift-diffusion model likelihood function to the latter (details see below). Prior  
1527 work (Jiang et al., 2015) uses a Gaussian likelihood function to describe RT generation in a  
1528 Bayesian learning framework similar to ours, but we argue that the use of DDM has several  
1529 advantages over the Gaussian approach: 1) fewer parameters are used in the DDM, making it  
1530 computationally possible to model two types of MSIT conflict at the same time; 2) the DDM  
1531 parameters have physiological meaning and thus also provide a clear physiological reasoning for  
1532 conflict prior to affect specific components of the decision process; 3) DDM has been widely used  
1533 and validated as the generative framework to model RT during decision making (Pedersen et al.,  
1534 2017; Wiecki et al., 2013).

1535

1536 Estimating control demand is operationalized as estimating the probability that a certain conflict  
1537 (Stroop, Simon or Flanker) would occur in the block. One advantage of our models is that they  
1538 estimate both the conflict probability and the rate of change in conflict probability in an online  
1539 manner, i.e., the models iteratively update their current estimates after every trial with new  
1540 incoming data (of that trial) using Bayes’ law. This is consistent with the way human subjects  
1541 perform conflict tasks while estimating the associated control demand: they perform and  
1542 estimate trial-by-trial. Note that in this study the conflict probability was constant throughout  
1543 the experiment (but this was not known to subjects). Nevertheless, we allow the model to infer  
1544 the learning rate  $\alpha$  online because humans demonstrate inherent bias in believing that

1545 environmental statistics are not stable (Yu and Cohen, 2008). There is therefore no fitting  
1546 involved for estimating  $\alpha$  and thus the models are not penalized for including this parameter in  
1547 model comparisons. Note that we use a single  $\alpha$  for both types of conflicts in MSIT. To simplify  
1548 model estimation, we made the Markovian assumption that the current estimate of conflict  
1549 probability depends only on the current trial congruency and RT, and the estimated conflict  
1550 probability on the last trial, but not on the full history of past trial conflict probability (Behrens et  
1551 al., 2007). The iterative estimation of conflict probability then involves combining the estimated  
1552 conflict probability from the previous trial (prior), transition functions capturing how the current  
1553 estimate will change from the previous one (the probability of current estimate conditional on  
1554 previous estimate) and the likelihood function.

1555  
1556 The model starts with a transition function for the learning rate  $\alpha$ :

1557  
1558 
$$p(\alpha_{i+1}|\alpha_i) = k\delta(\alpha_{i+1} - \alpha_i) + 1 - k$$

1559  
1560 This formulation assumes that the learning rate has a probability  $k$  of having the same distribution  
1561 as that of the preceding trial but with a probability  $1-k$  of switching to a uniform distribution (over  
1562 all possible  $\alpha$ ), because the learning rate is largely stable across time. The transition function for  
1563 conflict probability concerning the transition from the current estimate to a future estimate is  
1564 computed in two steps. Here, we refer to the current-trial estimate of conflict probability for  
1565 Stroop, Simon or Flanker generically as  $q_i$ , to which we assigned a uniform prior. The transition  
1566 function is thus denoted as  $p(q_{i+1}|q_i, \alpha_i)$ . First, an auxiliary variable  $q_{i+0.5}$  is constructed, which  
1567 is a beta-distributed random variable with its mode being  $q_i$  and the sum of two parameters  
1568 being  $\frac{1}{\alpha_{i+1}}$ :

1569  
1570 
$$v_{i+1} = \frac{1}{\alpha_{i+1}} - 2$$

1571  
1572 
$$q_{i+0.5} \sim \text{Beta}(q_i v_{i+1} + 1, v_{i+1} - q_i v_{i+1} + 1)$$

1573  
1574 The conflict probability transition function is then constructed as

1575  
1576 
$$q_{i+1} \sim q_{i+0.5} + \alpha_{i+1}(o_i - q_{i+0.5})$$

1577  
1578 The transition function adopts a classical update rule used in reinforcement learning models, and  
1579 the learning rate controls the balance between past ( $q_{i+0.5}$ ) and current information ( $o_i$ ). For  
1580 the MSIT model, we take the product of the transition functions computed separately for Simon  
1581 and Flanker predicted conflict. Finally, we consider the likelihood function. Since the trial  
1582 sequences were designed and re-used for different subjects, the estimated conflict probability  
1583 would be the same across subjects for the same sequence, but this is inconsistent with the fact  
1584 that such individual estimates should be subjective and different between participants. We thus  
1585 incorporated RTs from each subject, which are assumed to be generated through a drift-diffusion  
1586 process, to estimate a *subjective* conflict probability based on the assumption that a subjects' RT

1587 reflects the extent to which they engaged control. RT is assumed to be generated by a diffusion  
 1588 process. We used an abstract version of the drift-diffusion model where the two bounds  
 1589 represent the correct and wrong choice (and not the actual choices). The diffusion process  
 1590 accumulated the *difference* in the evidence between the target and distractor response (Fig. 1c,  
 1591 right), which is smaller for conflict trials and thus leads to longer RTs. We refer to the drift-  
 1592 diffusion likelihood function for RT as

1593  $p_{DDM}(v_{si}, v_{fl}, v_{sf}, v_{non-conflict}, vZ_{si}, vZ_{fl}, a, q_{si}, q_{fl})$  for the MSIT model, and  
 1594  $p_{DDM}(v_{conflict}, v_{stroop non-conflict}, vZ, a, q_s)$  for the Stroop model (Navarro and Fuss, 2009). The  
 1595 hyperparameters specifying the DDM are boundary separation ( $a$ ), base drift rates for Simon-  
 1596 only, Flanker-only, both Simon and Flanker present, and non-conflict trials in MSIT  
 1597 ( $v_{si}, v_{fl}, v_{sf}, v_{non-conflict}$ ), base drift rates for conflict and non-conflict trials in Stroop  
 1598 ( $v_{conflict}, v_{stroop non-conflict}$ ), and drift rate bias coefficients that scales the conflict probability  
 1599 of Simon, Flanker and Stroop ( $vZ_{si}, vZ_{fl}, vZ$ ). The effective drift rate is then the sum between the  
 1600 base drift rate and the drift rate bias (see Fig. 1c). Here we made the assumption that conflict  
 1601 prior affects RT by biasing *drift rates* based on a previous work investigating the effect of choice  
 1602 history on RT (Urai et al., 2019). We also assumed that the drift rate diffusion started at the half  
 1603 point of the boundary separation (i.e.,  $z = 0.5$ ). With the Markovian assumption, the updating  
 1604 process for the MSIT model is thus given by

$$1605$$

$$1606 \quad p(k, \alpha_{i+1}, q_{si,i+1}, q_{fl,i+1} | o_{si,\leq i+1}, o_{fl,\leq i+1}, RT_{\leq i+1}) \propto p(o_{si,i+1}, o_{fl,i+1}, RT_{i+1} | q_{si,i+1}, q_{fl,i+1})$$

$$1607 \quad \iint \left[ \int p(k, \alpha_i, q_{si,i}, q_{fl,i} | o_{si,\leq i}, o_{fl,\leq i}, RT_{\leq i}) p(\alpha_{i+1} | \alpha_i, k) d\alpha_i \right] p(q_{si,i+1} | q_{si,i}, \alpha_i) p(q_{fl,i+1} | q_{fl,i}, \alpha_i) dq_{si,i} dq_{fl,i}$$

$$1608$$

1609 The updating process for the Stroop model is given by

$$1610$$

$$1611 \quad p(k, \alpha_{i+1}, q_{s,i+1} | o_{s,\leq i+1}, RT_{\leq i+1})$$

$$1612 \quad \propto p(o_{s,i+1}, RT_{i+1} | q_{s,i+1}) \int \left[ \int p(k, \alpha_i, q_i | o_{s,\leq i}, RT_{\leq i}) p(\alpha_{i+1} | \alpha_i, k) d\alpha_i \right] p(q_{s,i+1} | q_{s,i}, \alpha_i) dq_{s,i}$$

$$1613$$

1614 The likelihood function is the product of Bernoulli likelihood for trial congruency and DDM  
 1615 likelihood for RT. For MSIT, the likelihood function is given as:

$$1616$$

$$1617 \quad p(o_{si,i+1}, o_{fl,i+1}, RT_{i+1} | q_{si,i+1}, q_{fl,i+1}) = (1 - |o_{si,i+1} - q_{si,i+1}|)(1 - |o_{fl,i+1} - q_{fl,i+1}|) p_{DDM}$$

$$1618$$

1619 For Stroop, the likelihood function is given as:

$$1620$$

$$1621 \quad p(o_{s,i+1}, RT_{i+1} | q_{s,i+1}) = (1 - |o_{s,i+1} - q_{s,i+1}|) p_{DDM}$$

$$1622$$

1623 These hyperparameters are estimated using an expectation-maximization (EM) algorithm as  
 1624 shown in earlier work (Jiang et al., 2015). Briefly, the model parameters were at first estimated  
 1625 *without* incorporating the DDM likelihood for RT (“E” step). Hyperparameters were then fit by  
 1626 maximizing the DDM likelihood for the observed RT using the conflict prior (s) obtained (“M”  
 1627 step). The DDM likelihood function with the fitted hyperparameters were then incorporated into

1628 the Bayesian updating process (“E” step) to generate a new set of conflict prior (s), which were  
1629 then used to maximize the DDM likelihood over observed RT again. These steps were repeated  
1630 until the convergence of both model parameters and hyperparameters (Euclidean distance  
1631 between parameter vectors from successive iterations  $< 10^{-5}$ ).

1632

1633 We considered three alternative classes of models: 1) reinforcement learning (RL) models; 2)  
1634 constant model; 3) Bayesian learning model without RT tuning. For the RL model, we constructed  
1635 a value function corresponding to the estimated conflict probability, and this estimate is also  
1636 updated trial-by-trial using a Rescorla-Wagner rule. For MSIT, the update rule is:

1637

$$1638 \quad q_{si,i+1} = q_{si,i} + \alpha(o_{si,i+1} - q_{si,i})$$

1639

$$1640 \quad q_{fl,i+1} = q_{fl,i} + \alpha(o_{fl,i+1} - q_{fl,i})$$

1641

1642 For Stroop, the update rule is:

1643

$$1644 \quad q_{s,i+1} = q_{s,i} + \alpha(o_{s,i+1} - q_{s,i})$$

1645

1646 The free parameter  $\alpha$  in the RL models was fit by maximizing the data likelihood (Bernoulli) for  
1647 trial congruency. For the constant model,  $q_s$ ,  $q_{si}$ ,  $q_{fl}$  were fit directly by maximizing the data  
1648 likelihood for trial congruency. For Bayesian conflict learning models without RT tuning,  $q_s$ ,  $q_{si}$ ,  
1649  $q_{fl}$  were estimated online but the likelihood function for RT was not incorporated in the process.

1650

1651 We used the Bayesian Information Criterion (BIC) to compare the RT-tuned Bayesian conflict  
1652 learning models with the RL models, constant models and the non-RT tuned Bayesian conflict  
1653 learning models. We compared these models separately for their ability to explain trial  
1654 congruency and RT. For this analysis, we pooled all data from all sessions and computed the BIC  
1655 for each model and for each data type (RT or trial congruency), consistent with a previous study  
1656 (Behrens et al., 2007). Results of model comparisons can be found in Tables S2 and S3.

1657

1658

### 1659 Selection of neurons

1660

1661 We defined the epochs of interests according to events in the tasks (see Figure 3a for an  
1662 illustration). The baseline epoch starts at 1.5s before stimulus onset and ends at stimulus onset.  
1663 This epoch is used to analyze encoding of conflict prior. The ex-ante epoch is anchored to the  
1664 midpoint of a period of time starting at 100ms after stimulus onset (to account for the minimal  
1665 delay needed for visual information to reach the MFC) and ending at the time of button presses.  
1666 We then defined the ex-ante epoch as a 500ms window centered on the midpoint of this period.  
1667 The rationale for analyzing conflict signals in this epoch is as follows: at the early stage of stimulus  
1668 processing, information about the different response options is not yet fully processed and hence  
1669 minimal conflict; the conflict signal should reach its maximum when the different stimulus

1670 dimensions that drive competing responses are fully available; and finally, it should subside after  
1671 a response is selected.

1672 We counted the number of spikes in these epochs and regressed the spike counts against the  
1673 different regressors (error, conflict, conflict surprise, conflict prior and conflict posterior) using  
1674 linear regression. For each regressor, we extracted a p value computed from the F test. A neuron  
1675 was deemed selective for this regressor when  $p < 0.05$ . For MSIT, since there were both Simon  
1676 and Flanker conflicts, neurons were selected when regressors related to either Simon or Flanker  
1677 conflict were significant (e.g., ex-ante conflict cells in MSIT were the union of neurons selective  
1678 for Simon conflict and Flanker conflict during the ex-ante epoch). To assess whether a neuronal  
1679 class is significantly present in the population, we derive a null distribution by permuting the  
1680 relation between spike counts and the regressor of interest for 1000 times. A p value is computed  
1681 by comparing the true proportion of selected neurons against this null distribution. The 95<sup>th</sup>  
1682 interval of the null distribution for each neuronal class is plotted as dotted lines in Figure 3b.  
1683 To statistically compare the extent of multiplexing between two groups of cells active in different  
1684 epochs (Figure 3d), we used the chi-squared test and reported the p-value and effect size of the  
1685 test.

1686

#### 1687 Single-trial spike train latency

1688

1689 We estimated the onset latency in individual trials using Poisson spike-train analysis (Figure 3e)  
1690 (Hanes et al., 1995). This method detects the moments when the observed inter-spike intervals  
1691 (ISI) deviate significantly from that assumed by a constant-rate baseline Poisson process. We  
1692 used the spike rate averaged across the whole block of experiment as a baseline spike rates for  
1693 each neuron. This baseline rate was then used to compute a Poisson surprise metric across the  
1694 spike train. We started our detection algorithm from the onset of stimulus for each trial. For the  
1695 ex-ante conflict neurons (two columns on the left), we restricted the range in which the detection  
1696 algorithm looks for bursts to after stimulus onset and before button presses. This is because, by  
1697 their definition, ex-ante conflict neurons carried a conflict signal before action. For the ex-post  
1698 conflict neurons (two columns on the right), we restricted the range to 200ms before button  
1699 presses and before end of trial. We then extract the latency of the first significant burst. The  
1700 statistical threshold for detecting an onset was  $p < 0.01$ . Repeating the same procedure with a  
1701 threshold of  $p < 0.001$  did not affect our conclusions. For these analyses, we only used the conflict  
1702 trials as we focused on the single-trial conflict response of selected conflict-encoding neurons.

1703

#### 1704 Correct-related potential (CRP) analyses

1705

1706 We simultaneously also recorded the intracranial electroencephalography (iEEG) while we  
1707 recorded single unit activity. iEEG data were acquired from low-impedance macro contacts  
1708 closest to the microwires. We focused on the contacts that were directly placed in dACC and pre-  
1709 SMA (as confirmed by post-operative imaging, see (Fu et al., 2019)). To extract the CRP, we  
1710 downsampled the iEEG data to a sampling frequency of 100Hz (using MATLAB “resample”) and  
1711 then bandpass filtered (0.1Hz-10Hz) the data with a finite impulse response filter (MATLAB  
1712 function “fir1”). Filtered data were then shifted in time to account for average filter delay

1713 (computed using MATLAB function “*grpdelay*”). We then computed the CRP amplitude for each  
1714 trial by averaging the filtered iEEG data within [0,250ms] after button presses.

1715

1716 To analyze whether the CRP amplitude was related to conflict and/or RT, we used a linear mixed-  
1717 effect model, pooling experimental sessions and electrodes. The model in Wilkinson’s notation  
1718 is given by

1719

$$1720 \quad \text{CRP} \sim \textit{Stroop prior} * \textit{Stroop conflict} + \textit{RT}$$
$$1721 \quad \quad \quad + (1 + \textit{Stroop prior} + \textit{RT} | \textit{sessionID}: \textit{subjectID})$$

1722

1723 The fixed effect of *Stroop conflict* is a dummy variable indicating whether a trial is a conflict  
1724 trial (value = 1) or not (value = 0). We analyzed the relation between spike counts of prior neurons  
1725 in dACC and pre-SMA and the simultaneously recorded CRP using a Poisson mixed-effect model.  
1726 Spike counts were gathered using a 500ms bin swept across the trial in steps of 25ms. The model  
1727 was computed for spike counts in each bin. The full model is given by:

1728

$$1729 \quad \text{Spike counts}(t) \sim \textit{CRP} + \textit{Stroop prior} + \textit{RT} + (1 | \textit{cellID})$$

1730

1731 To determine the statistical significance of each fixed effect, we compare the full model with a  
1732 reduced model with the fixed effect of interest removed and tested the likelihood ratio between  
1733 the full and reduced model using a likelihood ratio test. For the CRP-spike count relation model,  
1734 the reduced model is the same as the full model except that the fixed effect of *CRP* is removed.  
1735 We plotted the likelihood ratio from this model comparison as a function of time in Figure 3l. The  
1736 p-values were obtained from the likelihood ratio tests and corrected using false discovery rate  
1737 method.

1738

### 1739 *Detrended fluctuation analysis*

1740

1741 Detrended fluctuation analysis (DFA) was first developed by Peng and colleagues (Hardstone et  
1742 al., 2012; Peng et al., 1994) to quantify long-range temporal correlations (LRTC). We use DFA to  
1743 quantify the extent of LRTC in baseline spike counts on the scale of *trials*. First, the cumulative  
1744 sum of the spike counts during baseline was computed. To be consistent with prior literature we  
1745 refer to this cumulative sum as the *signal profile*. A set of trial window sizes were defined  
1746 between the lower bound of 4 trials and the upper bound of the block length. For each window  
1747 size, we then partitioned the signal profile into a series of data snippets. Partitioning was done  
1748 such that two adjacent snippets had an overlap of half the window size. We then removed the  
1749 linear trend from each data snippet (using least square regression) and computed the standard  
1750 deviation across time. The mean of the standard deviations across all snippets of identical  
1751 window size was then computed (y axis of Fig. 4f). Finally, the mean standard deviations were  
1752 regressed linearly against the logarithmically scaled time windows and the slope was extracted  
1753 as the DFA  $\alpha$  value (Fig. 4f shows the fluctuations as a function of logarithmically transformed  
1754 trial window sizes for two example neurons).

1755 For Fig 4a-b, we tested the relation between a neuron’s baseline DFA  $\alpha$  value and its tendency to  
1756 encode conflict prior. To avoid selection bias, we split trials into two sets of equal size, with one

1757 half consisting of a consecutive run of trials. This is because DFA is used for time series data and  
1758 thus required the data be consecutive and temporally ordered. For randomization, we first  
1759 randomly sampled one trial from the first half of the block. Then a consecutive run of trials  
1760 starting with this randomly picked trial as the starting point were extracted. The consecutive set  
1761 was used to compute DFA  $\alpha$  value while the rest of the trials were used to correlate with conflict  
1762 prior (Simon, Flanker or Stroop) using Spearman rank correlation.

1763

#### 1764 Decoding analysis (Support-vector machine)

1765

1766 Data were aggregated from different experimental sessions to create pseudo-population data  
1767 matrices. We constructed for each trial a peri-stimulus time histogram (PSTH) using 500ms bins  
1768 in steps of 25ms. For all conflict or conflict prior -related decoding, we used correct trials only.  
1769 Since different behavioral sessions had different number of trials (some subjects participated in  
1770 less sessions than the others), we subsampled the same number of trials from each condition for  
1771 each neuron and repeat this process 50 times. For error decoding, we subsampled 10 error trials  
1772 and 10 correct conflict trials for Stroop and 10 correct sf trials for MSIT. Since most errors  
1773 occurred on high conflict trials, these contrasts isolate the effect of error while controlling for the  
1774 effect of conflict. For conflict decoding, we subsampled 30 trials from each conflict conditions:  
1775 conflict and non-conflict trials for Stroop; Simon and non-Simon trials, Flanker and non-Flanker  
1776 trials for MSIT. For each time bin, we performed 5-fold cross validation using LIBSVM (Chang and  
1777 Lin, 2011). We used the linear kernel and set the  $c$  parameter to 1 for all analyses. In brief, trials  
1778 were first randomly split into 5 equal parts; each part was used in turn as the testing data while  
1779 the rest of the four parts were used as training data. Decoding accuracy was the proportion of  
1780 correct classifications among the 250 samples (50 resamples x 5 folds). Note that the resampling  
1781 was done once to generate testing and training sets for the whole time series and used for both  
1782 within-time and across-time decoding. For within-time decoding (All plots with dotted lines in Fig.  
1783 5), the SVM classifier trained using the training data from each time bin was tested using the  
1784 testing data from the same time bin. For cross-temporal decoding (temporal generalization; all  
1785 plots with solid lines in Fig. 5), the SVM classifier trained using the training data from each time  
1786 bin were tested across the trial using testing data gathered from other time bins.

1787

1788

#### 1789 Reaction times equalization

1790

1791 For analyses shown in Figures S6c and S7a-d, we selected a subset of trials from each condition  
1792 so that the RTs did not differ significantly across conditions (e.g., equalizing RTs between conflict  
1793 and non-conflict trials in the Stroop data). Here we detail the RT equalization procedure we used  
1794 to create “RT equalized sets”. We first selected a condition as the “anchor” condition. We sorted  
1795 the RTs of the anchor condition, and for each RT we searched in the target (to-be-equalized)  
1796 condition(s) for a trial whose RT did not differ from the anchor RT by more than 0.1s. If all RTs in  
1797 the target condition differed from the anchor RT by  $> 0.1s$ , the anchor RT was not included in the  
1798 RT equalized set. Once selected, the anchor RT and the target RT were both removed from the  
1799 original set to ensure that no trials were included twice in any RT equalized trial sets. This  
1800 procedure was repeated until one of the conditions considered were emptied. We confirmed

1801 post hoc that RT equalization was successful by testing whether RTs were not significantly  
1802 different using ANOVA ( $p > 0.5$  for all the RT equalized sets).

1803

1804

### 1805 *Decoding analysis (population activity vectors and demixed PCA)*

1806

1807 Data were aggregated from different experimental sessions to create a pseudo-population. We  
1808 randomly selected one trial for each neuron from one condition and concatenate the data from  
1809 each neuron to form a single-trial testing data matrix. The rest of the trials were averaged for  
1810 each condition and concatenated to form a training data matrix. Coding dimensions were defined  
1811 based on the condition-averaged training data. To define the coding dimensions used to decode  
1812 conflict conditions within MSIT, we used the population activity vectors (a high dimensional  
1813 vector in the raw firing rate space) defined by the difference between the two condition means.  
1814 To define coding dimensions for the cross-task decoding problems we used dPCA to extract  
1815 demixed principal components (dPC). Details of which trials were used to define the coding  
1816 dimensions used to generate Figures 6,7, S6 and S7 are given in the sections to follow. Both  
1817 testing and training data were projected onto the identified coding dimensions. The labels for  
1818 testing data were assigned according to the label of the nearest neighbor of the training data. To  
1819 test condition generalization, we projected the testing data from one pair of conditions to a  
1820 coding dimension defined by another pair of conditions (e.g., a Simon trial and non-Simon trial  
1821 projected to the population vector flanked by Flanker and non-Flanker trial averages) and  
1822 classified using the labels of the nearest projected training data. This decoding procedure was  
1823 repeated 1000 times (resulting in 1000 single-trial testing data matrices and the corresponding  
1824 training data matrices), and the decoding accuracy was defined by the proportion of correct  
1825 classifications among these 1000 repetitions. To determine statistical significance, we permuted  
1826 the trial labels for 500 times and for each permutation, we repeated all above steps to generate  
1827 a null distribution. A p-value was computed from comparing the true decoding accuracy with the  
1828 null distribution.

1829

### 1830 *Pseudo-population matrices for MSIT analyses*

1831

1832 For Figure 6a, we formed the pseudo-population data matrix by taking the average of spike  
1833 counts within the ex-ante or ex-post (1s after button presses) epoch across all Simon-only,  
1834 Flanker-only, Simon+ Flanker, and non-conflict trials, respectively. We then used PCA on this  
1835 condition-averaged data matrix to extract the three principal components (PC) that explained  
1836 most variance to visualize the geometric arrangement of the four conflict types. For Figure 6f-h,  
1837 trials were binned by quartiles of prior and posterior into four bins separately. However, because  
1838 conflict prior was updated into conflict posterior after each button press, binning priors does not  
1839 guarantee that the posteriors would fall into the same bins. This is because updating is specific  
1840 to each behavioral session and thus differs between neurons. Averaging trials using only bins  
1841 formed by prior quartiles would thus mix trials with different levels of posterior for each neuron.  
1842 To avoid this problem, we thus formed the data matrix (which now includes the time dimension  
1843 rather than a single ROI; spikes were counted in 500ms bins swept across the whole trial in steps  
1844 of 25ms; spike trains were aligned to button presses) by concatenating two submatrices: one that



1845 was constructed by averaging trials within bins defined by prior quartiles using data *before* button  
1846 presses, and one that was constructed from averaging trials within bins defined by posterior  
1847 quartiles for neural data *after* the button press. We then used PCA to find the three PCs that  
1848 explained the most variance for this matrix. The concatenated data matrix was then projected  
1849 onto these PCs to generate the visualization of trajectory corresponding to prior/posterior levels.

1850

### 1851 Vectors in the state space to quantify population geometry within MSIT

1852

1853 We next describe how coding dimensions were defined in each case using population activity  
1854 vectors in the raw firing rate space. For Figure 6b, the coding dimension was the population  
1855 vector flanked by the trial averages of sf and non-conflict trials (Fig. 6a, dashed lines).  
1856 Classifications were carried out between pairs of conflict conditions (e.g., between si and fl trials)  
1857 as detailed above. For Figure 6c, we took a bin-wise approach to investigate whether Simon  
1858 conflict representation generalize to Flanker representation, and vice versa. For this, we split  
1859 trials into four non-overlapping groups: Simon, Flanker, non-Simon, non-Flanker trial sets. We  
1860 split sf and non-conflict trials randomly in half. One half of sf trials were pooled with si trials to  
1861 form the Simon trial set, and one half of non-conflict trials were pooled with fl trials to form the  
1862 non-Simon trial set. The other half of sf trials were then pooled with fl trials to form the Flanker  
1863 trial set, and the other half of non-conflict trials were pooled with si trials to form non-Flanker  
1864 trial set. Using these trial sets, for each time bin we extracted two coding dimensions from the  
1865 training data: one population vector flanked by trial averages of Simon and non-Simon trials  
1866 (Simon coding dimension), and one population vector flanked by the trial averages of Flanker and  
1867 non-Flanker trials (Flanker coding dimension). We then projected the testing data from  
1868 Simon/non-Simon trials onto the Flanker coding dimension and classified the testing data using  
1869 the closest projected training data, and vice versa. For details of this classification procedure see  
1870 above paragraph. This assesses the extent to which coding of Simon and Flanker conflict is  
1871 abstract.

1872

### 1873 Compositionality of conflict representation

1874

1875 For Figure 6d, the coding dimension were taken to be the blue and orange edges as shown in  
1876 Figure 6a. The purpose of this analysis is to assess to what extent the representation of conflict  
1877 is compositional (within a task). We assumed that in the neuronal firing rate space, the  
1878 representation of Simon/Flanker conflict is a vector pointing from non-conflict trial averages to  
1879 the si/fl trial averages. Compositionality of such conflict representation would imply that the sf  
1880 representation (vector pointing from non-conflict trial average to the sf trial average) is equal to  
1881 the sum of the Simon and Flanker representations. According to the parallelogram law of vector  
1882 addition, this then corresponds to the blue and orange edges in Figure 6a forming a parallelogram.  
1883 We tested the extent of parallelism in the data using decoding. The coding dimensions here were  
1884 defined by the following population vectors using training data: one flanked by non-conflict and  
1885 si trial averages (Fig. 6a, blue), one flanked by fl and sf trial averages (blue), one flanked by fl and  
1886 non-conflict trial averages (orange) and one flanked by si and sf trial averages (orange). Left-out  
1887 testing data from conditions flanking one of the blue or orange pair of edges were then projected  
1888 to the other edge in the pair and classified by the training data defining this edge. For example,

1889 single-trial testing data of non-conflict and si trials were projected to the coding dimension  
1890 flanked by fl and sf trial averages and were classified by fl or sf trial averages.

1891

### 1892 Relationship of single neuron tuning with parallelism in geometry

1893

1894 For Figure 6e and Figure S6e, the goal is to investigate the relation between the nonlinearity in  
1895 single neuron conflict coding and the deviation from perfect compositionality in state space  
1896 representation of conflict. We denote the state-space representation of Simon and Flanker -only  
1897 conflict as the population vectors flanked by the trial averages of si and non-conflict and by the  
1898 trial averages of fl and non-conflict. We refer to the state space location occupied by the linear  
1899 sum of Simon and Flanker representation defined above as “s+f”. The deviation from perfect  
1900 compositionality is then given by the population vector flanked by “sf” and “s+f”. The loading of  
1901 “sf” to the “s+f” vector reflects the single neuron contribution to the deviation at the population  
1902 level. To quantify nonlinearity of conflict coding for each neuron, we first regressed the spike  
1903 counts in the ex-ante or ex-post epoch (1s) against three fixed effects: a Simon effect (dummy  
1904 variable indicating the presence or absence of Simon conflict on a trial), a Flanker effect (dummy  
1905 variable indicating the presence or absence of Flanker conflict on a trial) and the interaction term  
1906 between these two. We extracted the F statistic related to the interaction term, which captures  
1907 the effect of nonlinear mixing of Simon and Flanker conflict. We then extracted a population  
1908 vector flanked by the sf trial average and and “s+f”, the sum of two population vectors one  
1909 flanked by trial averages of si trials and non-conflict trials, and one flanked by trial averages of fl  
1910 trials and non-conflict trials. We then correlated the loading of “sf” - “s+f” vector and the F  
1911 statistics from a particular neuron.

1912

### 1913 Quantification of state space dynamics

1914

1915 For Figure 6i, we binned spike counts using 250ms bins swept across the trial in steps of 10ms.  
1916 The state-space speed was defined to be the Euclidean distance between population vectors of  
1917 adjacent time bins divided by the step size. We averaged the state-space speed across time within  
1918 an epoch. We also computed the Euclidean distance between pairs of trajectories (1<sup>st</sup> and 2<sup>nd</sup>,  
1919 2<sup>nd</sup> and 3<sup>rd</sup>, 3<sup>rd</sup> and 4<sup>th</sup>) and averaged this across trajectories and across time bins within an epoch.  
1920 State-space speed and the averaged distance between trajectories were plotted against each  
1921 other in Figure 6l. Our method for extracting speed in state-space follows prior work (Stokes et  
1922 al., 2013).

1923

### 1924 Testing ordinal relationship of prior/posterior projections

1925

1926 We analyzed the ordinal relation between neural projections of prior/posterior as shown in  
1927 Figure 6j-l. PCA axes encoding prior/posterior variance were extracted from spike count data  
1928 collected in ROIs (baseline for prior and the ex-post epoch (0-1s after button presses) for  
1929 posterior). Since prior/posterior is continuously valued, we created four trial conditions by  
1930 binning the trials using quartiles of prior/posterior. For each type of prior or posterior (Simon,  
1931 Flanker and Stroop), we projected the left-out trial (not used for computing the PCA axis) onto  
1932 the PCA axis for each trial condition and this procedure was repeated 1000 times, yielding 1000

1933 projected values for each trial condition. We then regressed the projected values (concatenated  
1934 into a vector) against their trial condition labels (1<sup>st</sup>, 2<sup>nd</sup>, 3<sup>rd</sup>, 4<sup>th</sup> quartile bins) using a multinomial  
1935 logistic regression with the assumption of ordinal relation between trial groups. Essentially, we  
1936 were testing whether the out-of-sample project values can reliably predict the trial condition  
1937 they belong to assuming that the conditions were ordinal. We reported the p-value and t-statistic  
1938 of the effect of projected values.

1939  
1940

#### 1941 Demixed Principal Component Analyses (dPCA)

1942

1943 We used dPCA to extract task-invariant representation of performance monitoring signals. For  
1944 Figures 7 and S7, we investigated task-invariant coding of error, conflict and conflict prior  
1945 separately, resulting in three separate optimization problems. For Figure S6, we investigated the  
1946 invariance coding of error and conflict. Analyses on conflict and conflict prior used only correct  
1947 trials. We used dPCA as described previously (Kobak et al., 2016), with the following adaptations  
1948 made for our purposes. The dPCA algorithm first decomposes population neural activity into  
1949 marginalized data matrices with respect to the variables of interest. For analyses in Figure 7a-c,  
1950 we constructed the marginalized population activity (referred generically as  $\overline{X_\phi}$ ) with respect to  
1951 error ( $\overline{X_{error}}$  in Fig. 7a) or conflict ( $\overline{X_{conflict}}$ , Fig. 7b-c) by marginalizing out time and task  
1952 dimensions (denoted by " $\langle \cdot \rangle_{task,t}$ ").

1953 For interpretability, we investigated whether the neural representation is abstract across tasks  
1954 separately between Stroop and Simon conflict (" $s$  &  $si$  conflict" is the task-invariant dimension  
1955 indicating presence of absence of conflict for both tasks) and between Stroop and Flanker  
1956 (" $s$  &  $fl$  conflict" is the task-invariant dimension indicating presence of absence of conflict for  
1957 both tasks). Set up this way, the "task" dimension captures variance related to task set  
1958 differences (Stroop vs. MSIT). To compute marginalized averages, we use N-dimensional  
1959 population activity

1960

$$1961 \overline{X_{Stroop\ error\ \&\ MSIT\ error}} = \langle r(error, task, t) - \bar{r}(t) \rangle_{task,t}$$

1962

$$1963 \overline{X_{s\ \&\ si\ conflict}} = \langle r(s\ \&\ si\ conflict, task, t) - \bar{r}(t) \rangle_{task,t}$$

1964

$$1965 \overline{X_{s\ \&\ fl\ conflict}} = \langle r(s\ \&\ fl\ conflict, task, t) - \bar{r}(t) \rangle_{task,t}$$

1966

1967 , where  $\bar{r}(t)$  is the firing rate averaged across trials and time bins. For Figure S7a-c, these  
1968 definitions are the same except that RT equalized trial sets were used.

1969 For Figure S6a-b, we sought a common coding dimension between error and conflict separately  
1970 for MSIT and Stroop, by marginalizing out the information about time and which pair of  
1971 conditions were contrasted ("contrast" indicator, for MSIT it indicates whether the contrast  
1972 considered is sf vs. non-conflict or error sf vs. correct sf; for Stroop it indicates whether the  
1973 contrast considered is correct conflict vs. correct non-conflict or error vs. correct conflict).

1974 we constructed the marginalized population activity with respect to error vs conflict in both

1975 MSIT ( $\overline{X_{MSIT\ error/sf}}$  in Fig. S6a,  $MSIT\ error/sf$  is the contrast-invariant dimension indicating

1976 presence or absence of errors and presence or absence of sf conflict) and Stroop  
 1977 ( $\overline{X_{Stroop\ error/conflict}}$  in Fig. S6b, *Stroop error/conflict* is the contrast-invariant dimension  
 1978 indicating presence or absence of errors and presence or absence of sf conflict) as follows:

1979  
 1980 
$$\overline{X_{MSIT\ error/sf}} = \langle r(MSIT\ error/sf, contrast, t) - \bar{r}(t) \rangle_{contrast, t}$$

1981  
 1982 
$$\overline{X_{Stroop\ error/conflict}} = \langle r(Stroop\ error/conflict, contrast, t) - \bar{r}(t) \rangle_{contrast, t}$$

1983  
 1984 For analyses in Figure 7d-f and Figure S7e-f investigating task-invariant coding of conflict prior,  
 1985 we used data from a single ROI (ex-ante or ex-epoch) and hence only the task but not time  
 1986 dimension was marginalized out. Here again for interpretability, we investigated cross-task  
 1987 representation between Stroop prior and Simon prior and between Stroop prior and Flanker  
 1988 prior separately, ensuring that the task dimension captures task set difference

1989  
 1990 
$$\overline{X_{s\ \&\ si\ conflict}} = \langle r(s\ \&\ si\ conflict, task) - \bar{r}(t) \rangle_{task}$$

1991  
 1992 
$$\overline{X_{s\ \&\ fl\ conflict}} = \langle r(s\ \&\ fl\ conflict, task) - \bar{r}(t) \rangle_{task}$$

1993  
 1994 
$$\overline{X_{s\ \&\ si\ prior}} = \langle r(s\ \&\ si\ conflict, task) - \bar{r}(t) \rangle_{task}$$

1995  
 1996 
$$\overline{X_{s\ \&\ fl\ prior}} = \langle r(s\ \&\ fl\ conflict, task) - \bar{r}(t) \rangle_{task}$$

1997  
 1998 For analyses in Figure S7d, these definitions are the same except that RT equalized trial sets were  
 1999 used.

2000 The algorithm then finds encoding ( $F_\phi$ ) and decoding ( $D_\phi$ ) matrices separately for each  
 2001 marginalized averages using the regularized reduced-rank regression:

2002  
 2003 
$$L_\phi = \|\overline{X_\phi} - F_\phi D_\phi \bar{X}\|^2 + \mu \|F_\phi D_\phi\|^2$$

2004  
 2005 We assigned a regularization coefficient  $\mu$  to avoid overfitting ( $\mu = 6e^{-6}$  determined from  
 2006 results reported in (Kobak et al., 2016)). We used the columns of  $D_\phi$  as the demixed principal  
 2007 components (dPC) and projected N-dimensional data (single-trial data for testing and trial-  
 2008 averaged data for training) to these dPCs. The numerical values of  $D_\phi$  reflects the contribution  
 2009 for each neuron to task-invariant representation.

2010  
 2011 To test the statistical significance of coding dimensions, we randomly chose one trial for each  
 2012 trial type (e.g., one error trial and one correct trial) and constructed a single-trial activity matrix  
 2013  $X_{test}$ . We then used the remaining trials to form the trial-averaged training data  $\overline{X_{train}}$ , which is  
 2014 used to find the dPCA coding dimensions. The left-out single-trial data  $X_{test}$  is then projected  
 2015 onto the first coding dimension that captures the most variance computed from  $X_{train}$ , and  
 2016 classified according to the closest class mean. We repeated this procedure 1000 times and  
 2017 determined the decoding accuracy as the proportion of correct classification among the 1000  
 2018 test trials. We then generated the null distribution by shuffling the trial labels and then repeated

2019 the decoding procedure 500 times. For Figure 7d-f, statistical significance is determined by  
2020 comparing the true decoding accuracy with this null distribution. For Figure 7a-c, statistical  
2021 significance is determined by the cluster-based permutation test using this null distribution  
2022 (Maris and Oostenveld, 2007). The fraction of explained variance (Bars in Figures 7a-c,e-f and  
2023 S7a-c,e-f) for each marginalization is given by:

2024 
$$R_{\phi}^2 = \frac{\|\bar{X}_{\phi}\|^2 - \|\bar{X}_{\phi} - F_{\phi} D_{\phi} \bar{X}\|^2}{\|\bar{X}_{\phi}\|^2}$$

2025  
2026 For analyses in Figure 7g-j and Figure S7 g-k, we first quantify for each single neuron its task-  
2027 invariant coding strength of error, conflict or conflict prior within a certain ROI. Spike counts  
2028 within the baseline, ex-ante or ex-post epochs from MSIT and Stroop were concatenated and  
2029 were regressed against three fixed effects: a cognitive effect (trial outcome, trial congruency or  
2030 conflict prior), a task effect (a dummy variable with value 1 for MSIT and value 0 for Stroop) and  
2031 an interaction between these two. The signed effect size is taken to be the t-statistic computed  
2032 from this linear regression. The t-statistic related to the cognitive effect characterizes the  
2033 strength of task-invariant coding of cognitive variables (error, conflict and conflict prior). The task  
2034 dependency of such coding is captured by the t-statistic of the interaction term (which indicates  
2035 that a neuron exhibits non-linear mixing).

2036 Neurons with a significant cognitive effect but a non-significant task effect and a non-significant  
2037 interaction term were classified as “task-invariant” neurons. Neurons with a significant  
2038 interaction term are classified as “task-dependent” neurons.

2039  
2040

## 2041 **References**

2042  
2043 Aarts, E., Verhage, M., Veenvliet, J.V., Dolan, C.V., and van der Sluis, S. (2014). A solution to  
2044 dependency: using multilevel analysis to accommodate nested data. *Nat. Neurosci.* *17*, 491–  
2045 496.

2046 Aron, A.R., Behrens, T.E., Smith, S., Frank, M.J., and Poldrack, R.A. (2007). Triangulating a  
2047 cognitive control network using diffusion-weighted magnetic resonance imaging (MRI) and  
2048 functional MRI. *J. Neurosci. Off. J. Soc. Neurosci.* *27*, 3743–3752.

2049 Bach, D.R., and Dayan, P. (2017). Algorithms for survival: a comparative perspective on  
2050 emotions. *Nat. Rev. Neurosci.* *18*, 311–319.

2051 Bean, B.P. (2007). The action potential in mammalian central neurons. *Nat. Rev. Neurosci.* *8*,  
2052 451–465.

2053 Behrens, T.E.J., Woolrich, M.W., Walton, M.E., and Rushworth, M.F.S. (2007). Learning the  
2054 value of information in an uncertain world. *Nat. Neurosci.* *10*, 1214–1221.

2055 Bernacchia, A., Seo, H., Lee, D., and Wang, X.-J. (2011). A reservoir of time constants for  
2056 memory traces in cortical neurons. *Nat. Neurosci.* *14*, 366–372.

- 2057 Bernardi, S., Benna, M.K., Rigotti, M., Munuera, J., Fusi, S., and Salzman, C.D. (2020). The  
2058 Geometry of Abstraction in the Hippocampus and Prefrontal Cortex. *Cell* *183*, 954-967.e21.
- 2059 Bonini, F., Burle, B., Liégeois-Chauvel, C., Régis, J., Chauvel, P., and Vidal, F. (2014). Action  
2060 Monitoring and Medial Frontal Cortex: Leading Role of Supplementary Motor Area. *Science*  
2061 *343*, 888–891.
- 2062 Botvinick, M.M., Braver, T.S., Barch, D.M., Carter, C.S., and Cohen, J.D. (2001). Conflict  
2063 monitoring and cognitive control. *Psychol. Rev.* *108*, 624–652.
- 2064 Brainard, D.H. (1997). The Psychophysics Toolbox. *Spat. Vis.* *10*, 433–436.
- 2065 Braver, T.S. (2012). The variable nature of cognitive control: a dual mechanisms framework.  
2066 *Trends Cogn. Sci.* *16*, 106–113.
- 2067 Bush, G., and Shin, L.M. (2006). The Multi-Source Interference Task: an fMRI task that reliably  
2068 activates the cingulo-frontal-parietal cognitive/attention network. *Nat. Protoc.* *1*, 308–313.
- 2069 Buzsáki, G., Anastassiou, C.A., and Koch, C. (2012). The origin of extracellular fields and currents  
2070 — EEG, ECoG, LFP and spikes. *Nat. Rev. Neurosci.* *13*, 407–420.
- 2071 Carter, C.S., Braver, T.S., Barch, D.M., Botvinick, M.M., Noll, D., and Cohen, J.D. (1998). Anterior  
2072 Cingulate Cortex, Error Detection, and the Online Monitoring of Performance. *Science* *280*,  
2073 747–749.
- 2074 Carter, C.S., Macdonald, A.M., Botvinick, M., Ross, L.L., Stenger, V.A., Noll, D., and Cohen, J.D.  
2075 (2000). Parsing executive processes: Strategic vs. evaluative functions of the anterior cingulate  
2076 cortex. *Proc. Natl. Acad. Sci.* *97*, 1944–1948.
- 2077 Cavanagh, J.F., Wiecki, T.V., Cohen, M.X., Figueroa, C.M., Samanta, J., Sherman, S.J., and Frank,  
2078 M.J. (2011). Subthalamic nucleus stimulation reverses mediofrontal influence over decision  
2079 threshold. *Nat. Neurosci.* *14*, 1462–1467.
- 2080 Cavanagh, S.E., Wallis, J.D., Kennerley, S.W., and Hunt, L.T. (2016). Autocorrelation structure at  
2081 rest predicts value correlates of single neurons during reward-guided choice. *ELife* *5*, e18937.
- 2082 Cavanagh, S.E., Towers, J.P., Wallis, J.D., Hunt, L.T., and Kennerley, S.W. (2018). Reconciling  
2083 persistent and dynamic hypotheses of working memory coding in prefrontal cortex. *Nat.*  
2084 *Commun.* *9*, 3498.
- 2085 Chang, C.-C., and Lin, C.-J. (2011). LIBSVM: A library for support vector machines. *ACM Trans.*  
2086 *Intell. Syst. Technol.* *2*, 27:1-27:27.
- 2087 Crone, E.A., Somsen, R.J.M., Beek, B.V., and Molen, M.W.V.D. (2004). Heart rate and skin  
2088 conductance analysis of antecedents and consequences of decision making. *Psychophysiology*  
2089 *41*, 531–540.

- 2090 Crosson, B., Sadek, J.R., Bobholz, J.A., Gökçay, D., Mohr, C.M., Leonard, C.M., Maron, L.,  
2091 Auerbach, E.J., Browd, S.R., Freeman, A.J., et al. (1999). Activity in the Paracingulate and  
2092 Cingulate Sulci during Word Generation: An fMRI Study of Functional Anatomy. *Cereb. Cortex* *9*,  
2093 307–316.
- 2094 Danielmeier, C., Eichele, T., Forstmann, B.U., Tittgemeyer, M., and Ullsperger, M. (2011).  
2095 Posterior Medial Frontal Cortex Activity Predicts Post-Error Adaptations in Task-Related Visual  
2096 and Motor Areas. *J. Neurosci.* *31*, 1780–1789.
- 2097 Darlington, T.R., Beck, J.M., and Lisberger, S.G. (2018). Neural implementation of Bayesian  
2098 inference in a sensorimotor behavior. *Nat. Neurosci.* *21*, 1442–1451.
- 2099 DiCarlo, J.J., and Cox, D.D. (2007). Untangling invariant object recognition. *Trends Cogn. Sci.* *11*,  
2100 333–341.
- 2101 Dubois, J., de Berker, A.O., and Tsao, D.Y. (2015). Single-unit recordings in the macaque face  
2102 patch system reveal limitations of fMRI MVPA. *J. Neurosci. Off. J. Soc. Neurosci.* *35*, 2791–2802.
- 2103 Duthoo, W., Abrahamse, E.L., Braem, S., Boehler, C.N., and Notebaert, W. (2014). The  
2104 heterogeneous world of congruency sequence effects: an update. *Front. Psychol.* *5*.
- 2105 Ebitz, R.B., and Platt, M.L. (2015). Neuronal Activity in Primate Dorsal Anterior Cingulate Cortex  
2106 Signals Task Conflict and Predicts Adjustments in Pupil-Linked Arousal. *Neuron* *85*, 628–640.
- 2107 Egner, T. (2007). Congruency sequence effects and cognitive control. *Cogn. Affect. Behav.*  
2108 *Neurosci.* *7*, 380–390.
- 2109 Egner, T., and Hirsch, J. (2005). Cognitive control mechanisms resolve conflict through cortical  
2110 amplification of task-relevant information. *Nat. Neurosci.* *8*, 1784–1790.
- 2111 Eldar, E., Rutledge, R.B., Dolan, R.J., and Niv, Y. (2016). Mood as Representation of Momentum.  
2112 *Trends Cogn. Sci.* *20*, 15–24.
- 2113 Fan, J., Flombaum, J.I., McCandliss, B.D., Thomas, K.M., and Posner, M.I. (2003). Cognitive and  
2114 Brain Consequences of Conflict. *NeuroImage* *18*, 42–57.
- 2115 Friston, K.J. (2002). Bayesian Estimation of Dynamical Systems: An Application to fMRI.  
2116 *NeuroImage* *16*, 513–530.
- 2117 Fu, Z., Wu, D.-A.J., Ross, I., Chung, J.M., Mamelak, A.N., Adolphs, R., and Rutishauser, U. (2019).  
2118 Single-Neuron Correlates of Error Monitoring and Post-Error Adjustments in Human Medial  
2119 Frontal Cortex. *Neuron* *101*, 165-177.e5.
- 2120 Fusi, S., Miller, E.K., and Rigotti, M. (2016). Why neurons mix: high dimensionality for higher  
2121 cognition. *Curr. Opin. Neurobiol.* *37*, 66–74.

- 2122 Gratton, G., Coles, M.G., and Donchin, E. (1992). Optimizing the use of information: strategic  
2123 control of activation of responses. *J. Exp. Psychol. Gen.* *121*, 480–506.
- 2124 Hanes, D.P., Thompson, K.G., and Schall, J.D. (1995). Relationship of presaccadic activity in  
2125 frontal eye field and supplementary eye field to saccade initiation in macaque: Poisson spike  
2126 train analysis. *Exp. Brain Res.* *103*, 85–96.
- 2127 Hardstone, R., Poil, S.-S., Schiavone, G., Jansen, R., Nikulin, V.V., Mansvelder, H.D., and  
2128 Linkenkaer-Hansen, K. (2012). Detrended Fluctuation Analysis: A Scale-Free View on Neuronal  
2129 Oscillations. *Front. Physiol.* *3*.
- 2130 Heilbronner, S.R., and Hayden, B.Y. (2016). Dorsal Anterior Cingulate Cortex: A Bottom-Up  
2131 View. *Annu. Rev. Neurosci.* *39*, 149–170.
- 2132 Heitz, R.P., and Schall, J.D. (2012). Neural Mechanisms of Speed-Accuracy Tradeoff. *Neuron* *76*,  
2133 616–628.
- 2134 Herrera, B., Sajad, A., Woodman, G.F., Schall, J.D., and Riera, J.J. (2020). A Minimal Biophysical  
2135 Model of Neocortical Pyramidal Cells: Implications for Frontal Cortex Microcircuitry and Field  
2136 Potential Generation. *J. Neurosci.* *40*, 8513–8529.
- 2137 Higgins, I., Matthey, L., Pal, A., Burgess, C., Glorot, X., Botvinick, M., Mohamed, S., and Lerchner,  
2138 A. (2016). beta-VAE: Learning Basic Visual Concepts with a Constrained Variational Framework.
- 2139 Higgins, I., Amos, D., Pfau, D., Racaniere, S., Matthey, L., Rezende, D., and Lerchner, A. (2018).  
2140 Towards a Definition of Disentangled Representations. *ArXiv181202230 Cs Stat.*
- 2141 Ide, J.S., Shenoy, P., Yu, A.J., and Li, C.R. (2013). Bayesian Prediction and Evaluation in the  
2142 Anterior Cingulate Cortex. *J. Neurosci.* *33*, 2039–2047.
- 2143 Ito, S., Stuphorn, V., Brown, J.W., and Schall, J.D. (2003). Performance Monitoring by the  
2144 Anterior Cingulate Cortex During Saccade Countermanding. *Science* *302*, 120–122.
- 2145 Jiang, J., and Egner, T. (2014). Using Neural Pattern Classifiers to Quantify the Modularity of  
2146 Conflict–Control Mechanisms in the Human Brain. *Cereb. Cortex* *24*, 1793–1805.
- 2147 Jiang, J., Heller, K., and Egner, T. (2014). Bayesian modeling of flexible cognitive control.  
2148 *Neurosci. Biobehav. Rev.* *46*, 30–43.
- 2149 Jiang, J., Beck, J., Heller, K., and Egner, T. (2015). An insula-frontostriatal network mediates  
2150 flexible cognitive control by adaptively predicting changing control demands. *Nat. Commun.* *6*,  
2151 8165.
- 2152 Kawai, T., Yamada, H., Sato, N., Takada, M., and Matsumoto, M. (2019). Preferential  
2153 Representation of Past Outcome Information and Future Choice Behavior by Putative Inhibitory



- 2154 Interneurons Rather Than Putative Pyramidal Neurons in the Primate Dorsal Anterior Cingulate  
2155 Cortex. *Cereb. Cortex* 29, 2339–2352.
- 2156 Kerns, J.G., Cohen, J.D., MacDonald, A.W., Cho, R.Y., Stenger, V.A., and Carter, C.S. (2004).  
2157 Anterior Cingulate Conflict Monitoring and Adjustments in Control. *Science* 303, 1023–1026.
- 2158 King, J.A., Korb, F.M., von Cramon, D.Y., and Ullsperger, M. (2010). Post-Error Behavioral  
2159 Adjustments Are Facilitated by Activation and Suppression of Task-Relevant and Task-Irrelevant  
2160 Information Processing. *J. Neurosci.* 30, 12759–12769.
- 2161 Kobak, D., Brendel, W., Constantinidis, C., Feierstein, C.E., Kepecs, A., Mainen, Z.F., Qi, X.-L.,  
2162 Romo, R., Uchida, N., and Machens, C.K. (2016). Demixed principal component analysis of  
2163 neural population data. *ELife* 5, e10989.
- 2164 de Leeuw, J.R. (2015). jsPsych: A JavaScript library for creating behavioral experiments in a Web  
2165 browser. *Behav. Res. Methods* 47, 1–12.
- 2166 Liu, X., Banich, M.T., Jacobson, B.L., and Tanabe, J.L. (2004). Common and distinct neural  
2167 substrates of attentional control in an integrated Simon and spatial Stroop task as assessed by  
2168 event-related fMRI. *NeuroImage* 22, 1097–1106.
- 2169 Lo, C.-C., and Wang, X.-J. (2006). Cortico–basal ganglia circuit mechanism for a decision  
2170 threshold in reaction time tasks. *Nat. Neurosci.* 9, 956–963.
- 2171 Logan, G.D., and Zbrodoff, N.J. (1979). When it helps to be misled: Facilitative effects of  
2172 increasing the frequency of conflicting stimuli in a Stroop-like task. *Mem. Cognit.* 7, 166–174.
- 2173 Maris, E., and Oostenveld, R. (2007). Nonparametric statistical testing of EEG- and MEG-data. *J.*  
2174 *Neurosci. Methods* 164, 177–190.
- 2175 McDougale, S.D., Boggess, M.J., Crossley, M.J., Parvin, D., Ivry, R.B., and Taylor, J.A. (2016). Credit  
2176 assignment in movement-dependent reinforcement learning. *Proc. Natl. Acad. Sci.* 113, 6797–  
2177 6802.
- 2178 Miller, E.K., and Cohen, J.D. (2001). An Integrative Theory of Prefrontal Cortex Function. *Annu.*  
2179 *Rev. Neurosci.* 24, 167–202.
- 2180 Minxha, J., Mosher, C., Morrow, J.K., Mamelak, A.N., Adolphs, R., Gothard, K.M., and  
2181 Rutishauser, U. (2017). Fixations Gate Species-Specific Responses to Free Viewing of Faces in  
2182 the Human and Macaque Amygdala. *Cell Rep.* 18, 878–891.
- 2183 Minxha, J., Adolphs, R., Fusi, S., Mamelak, A.N., and Rutishauser, U. (2020). Flexible recruitment  
2184 of memory-based choice representations by the human medial frontal cortex. *Science* 368.
- 2185 Morales, J., Lau, H., and Fleming, S.M. (2018). Domain-General and Domain-Specific Patterns of  
2186 Activity Supporting Metacognition in Human Prefrontal Cortex. *J. Neurosci.* 38, 3534–3546.

- 2187 Mosher, C.P., Wei, Y., Kamiński, J., Nandi, A., Mamelak, A.N., Anastassiou, C.A., and Rutishauser,  
2188 U. (2020). Cellular Classes in the Human Brain Revealed In Vivo by Heartbeat-Related  
2189 Modulation of the Extracellular Action Potential Waveform. *Cell Rep.* *30*, 3536-3551.e6.
- 2190 Murphy, P.R., Boonstra, E., and Nieuwenhuis, S. (2016). Global gain modulation generates time-  
2191 dependent urgency during perceptual choice in humans. *Nat. Commun.* *7*, 13526.
- 2192 Navarro, D.J., and Fuss, I.G. (2009). Fast and accurate calculations for first-passage times in  
2193 Wiener diffusion models. *J. Math. Psychol.* *53*, 222–230.
- 2194 Niv, Y., Daw, N.D., Joel, D., and Dayan, P. (2007). Tonic dopamine: opportunity costs and the  
2195 control of response vigor. *Psychopharmacology (Berl.)* *191*, 507–520.
- 2196 Pedersen, M.L., Frank, M.J., and Biele, G. (2017). The drift diffusion model as the choice rule in  
2197 reinforcement learning. *Psychon. Bull. Rev.* *24*, 1234–1251.
- 2198 Peng, C.K., Buldyrev, S.V., Havlin, S., Simons, M., Stanley, H.E., and Goldberger, A.L. (1994).  
2199 Mosaic organization of DNA nucleotides. *Phys. Rev. E Stat. Phys. Plasmas Fluids Relat.*  
2200 *Interdiscip. Top.* *49*, 1685–1689.
- 2201 Pouget, P., Logan, G.D., Palmeri, T.J., Boucher, L., Paré, M., and Schall, J.D. (2011). Neural basis  
2202 of adaptive response time adjustment during saccade countermanding. *J. Neurosci. Off. J. Soc.*  
2203 *Neurosci.* *31*, 12604–12612.
- 2204 Purcell, B.A., and Kiani, R. (2016). Neural Mechanisms of Post-error Adjustments of Decision  
2205 Policy in Parietal Cortex. *Neuron* *89*, 658–671.
- 2206 Rigotti, M., Barak, O., Warden, M.R., Wang, X.-J., Daw, N.D., Miller, E.K., and Fusi, S. (2013). The  
2207 importance of mixed selectivity in complex cognitive tasks. *Nature* *497*, 585–590.
- 2208 Rutishauser, U., Schuman, E.M., and Mamelak, A.N. (2006). Online detection and sorting of  
2209 extracellularly recorded action potentials in human medial temporal lobe recordings, in vivo. *J.*  
2210 *Neurosci. Methods* *154*, 204–224.
- 2211 Sajad, A., Godlove, D.C., and Schall, J.D. (2019). Cortical microcircuitry of performance  
2212 monitoring. *Nat. Neurosci.* *22*, 265–274.
- 2213 Sarafyazd, M., and Jazayeri, M. (2019). Hierarchical reasoning by neural circuits in the frontal  
2214 cortex. *Science* *364*.
- 2215 Schmidt, J.R., and De Houwer, J. (2011). Now you see it, now you don't: Controlling for  
2216 contingencies and stimulus repetitions eliminates the Gratton effect. *Acta Psychol. (Amst.)* *138*,  
2217 176–186.

- 2218 Shackman, A.J., Salomons, T.V., Slagter, H.A., Fox, A.S., Winter, J.J., and Davidson, R.J. (2011).  
2219 The integration of negative affect, pain and cognitive control in the cingulate cortex. *Nat. Rev.*  
2220 *Neurosci.* *12*, 154–167.
- 2221 Shenhav, A., Botvinick, M.M., and Cohen, J.D. (2013). The Expected Value of Control: An  
2222 Integrative Theory of Anterior Cingulate Cortex Function. *Neuron* *79*, 217–240.
- 2223 Sheth, S.A., Mian, M.K., Patel, S.R., Asaad, W.F., Williams, Z.M., Dougherty, D.D., Bush, G., and  
2224 Eskandar, E.N. (2012). Human dorsal anterior cingulate cortex neurons mediate ongoing  
2225 behavioural adaptation. *Nature* *488*, 218–221.
- 2226 Sohn, H., Narain, D., Meirhaeghe, N., and Jazayeri, M. (2019). Bayesian Computation through  
2227 Cortical Latent Dynamics. *Neuron* *103*, 934-947.e5.
- 2228 Stokes, M.G., Kusunoki, M., Sigala, N., Nili, H., Gaffan, D., and Duncan, J. (2013). Dynamic  
2229 Coding for Cognitive Control in Prefrontal Cortex. *Neuron* *78*, 364–375.
- 2230 Stroop, J.R. (1935). Studies of interference in serial verbal reactions. *J. Exp. Psychol.* *18*, 643–  
2231 662.
- 2232 Stuphorn, V., Taylor, T.L., and Schall, J.D. (2000). Performance monitoring by the supplementary  
2233 eye field. *Nature* *408*, 857–860.
- 2234 Tang, H., Yu, H.-Y., Chou, C.-C., Crone, N.E., Madsen, J.R., Anderson, W.S., and Kreiman, G.  
2235 (2016). Cascade of neural processing orchestrates cognitive control in human frontal cortex.  
2236 *ELife* *5*, e12352.
- 2237 Thura, D., and Cisek, P. (2017). The Basal Ganglia Do Not Select Reach Targets but Control the  
2238 Urgency of Commitment. *Neuron* *95*, 1160-1170.e5.
- 2239 Tzelgov, J., Henik, A., and Berger, J. (1992). Controlling Stroop effects by manipulating  
2240 expectations for color words. *Mem. Cognit.* *20*, 727–735.
- 2241 Ullsperger, M. (2017). Neural bases of performance monitoring. In *The Wiley Handbook of*  
2242 *Cognitive Control*, (Wiley Blackwell), pp. 292–313.
- 2243 Ullsperger, M., Danielmeier, C., and Jocham, G. (2014). Neurophysiology of Performance  
2244 Monitoring and Adaptive Behavior. *Physiol. Rev.* *94*, 35–79.
- 2245 Urai, A.E., de Gee, J.W., Tsetsos, K., and Donner, T.H. (2019). Choice history biases subsequent  
2246 evidence accumulation. *ELife* *8*, e46331.
- 2247 Vigneswaran, G., Kraskov, A., and Lemon, R.N. (2011). Large Identified Pyramidal Cells in  
2248 Macaque Motor and Premotor Cortex Exhibit “Thin Spikes”: Implications for Cell Type  
2249 Classification. *J. Neurosci.* *31*, 14235–14242.

- 2250 Vogt, B.A., Nimchinsky, E.A., Vogt, L.J., and Hof, P.R. (1995). Human cingulate cortex: Surface  
2251 features, flat maps, and cytoarchitecture. *J. Comp. Neurol.* *359*, 490–506.
- 2252 Wang, X.-J. (2002). Probabilistic Decision Making by Slow Reverberation in Cortical Circuits.  
2253 *Neuron* *36*, 955–968.
- 2254 Wang, J., Narain, D., Hosseini, E.A., and Jazayeri, M. (2018a). Flexible timing by temporal scaling  
2255 of cortical responses. *Nat. Neurosci.* *21*, 102–110.
- 2256 Wang, S., Mamelak, A.N., Adolphs, R., and Rutishauser, U. (2018b). Encoding of Target  
2257 Detection during Visual Search by Single Neurons in the Human Brain. *Curr. Biol.* *28*, 2058-  
2258 2069.e4.
- 2259 Wessel, J.R., and Aron, A.R. (2017). On the Globality of Motor Suppression: Unexpected Events  
2260 and Their Influence on Behavior and Cognition. *Neuron* *93*, 259–280.
- 2261 Wiecki, T.V., Sofer, I., and Frank, M.J. (2013). HDDM: Hierarchical Bayesian estimation of the  
2262 Drift-Diffusion Model in Python. *Front. Neuroinformatics* *7*.
- 2263 Woodman, G.F. (2010). A brief introduction to the use of event-related potentials in studies of  
2264 perception and attention. *Atten. Percept. Psychophys.* *72*, 2031–2046.
- 2265 Yeung, N., and Summerfield, C. (2012). Metacognition in human decision-making: confidence  
2266 and error monitoring. *Philos. Trans. R. Soc. B Biol. Sci.* *367*, 1310–1321.
- 2267 Yu, A.J., and Cohen, J.D. (2008). Sequential effects: Superstition or rational behavior? *Adv.*  
2268 *Neural Inf. Process. Syst.* *21*, 1873–1880.
- 2269
